# Supplementary material for: Highly regio- and diastereoselective [3 + 2]-cycloadditions involving indolediones and α,β-disubstituted nitroethylenes
Source: Royal Society of Chemistry journal article supplement (doi:10.1039/c9ob01429b), 2019-01-01
Supplement: c9ob01429b1.pdf [file c9ob01429b1.pdf]

## Supporting Information

### Diastereoselective [3+2]-Cycloaddition of Oxindoles with $\alpha,\beta$ -Disubstituted Nitroethylenes: Regioreversed Spiropyrrolidines Posed Potent MRSA Activity

Madhuri P. Rao<sup>a</sup>, Shubha S. Gunaga<sup>b</sup>, Johannes Zuegg<sup>c</sup>, Rambabu Pamarthi<sup>a</sup> and Madhu Ganesh<sup>\*a</sup>

<sup>a</sup>Department of Chemistry, B.M.S. College of Engineering, Bull Temple Rd, Bengaluru 560019, India

<sup>b</sup>Solid State & Structural Chemistry Unit, Indian Institute of Science, CV Raman Rd, Bengaluru 560012, India

<sup>c</sup>CO-ADD, Institute of Molecular Bioscience, University of Queensland, Carmody Rd 306, Brisbane 4072, Australia

E-mail: [madhug.chem@bmsce.ac.in](mailto:madhug.chem@bmsce.ac.in)

#### Contents

|      |                                                                                   |         |
|------|-----------------------------------------------------------------------------------|---------|
| I    | X-ray crystal structures and data of <b>13a</b> , <b>13l</b> & <b>14a</b>         | S2-S5   |
| II   | Copies of NMR Spectra of <b>13a-13k</b>                                           | S6-S17  |
| III  | Copies of NMR Spectra of <b>14a-14h</b>                                           | S18-S26 |
| IV   | Copies of NMR Spectra of <b>13l-13s</b>                                           | S2-S34  |
| V    | Copies of NMR Spectra of <b>15</b> & <b>16</b>                                    | S35-S36 |
| VI   | Copies of 2D-NMR spectra of <b>13l</b>                                            | S37-S39 |
| VII  | Copies of HPLC chromatograms for starting materials <b>6b-6j</b> & <b>12a-12i</b> | S40-S50 |
| VIII | Chem3D GS Single point MM2 Calculations on the Intermediate Structures            | S51-S54 |

## I. X-ray crystal structure and data of **13a**, **13l** & **14a**

### Instrumental details about crystal **13a**

Good quality single crystals were collected under an optical microscope equipped with polarizer. A high resolution data set of crystal  $C_{18}H_{16}BrN_3O_3$  was collected on Bruker APEX-II CCD diffractometer using  $MoK\alpha$  radiation ( $\lambda=0.71073 \text{ \AA}$ ) at 298K. The single crystal was affixed to a Hampton Research cryoloop using Paratone-N oil. Data collection and reduction was performed using Bruker APEX2 and Bruker SAINT, respectively. The structure was solved by patterson methods using SHELXS-97 (Sheldrick, 2008) and were refined by SHELXL-97 (Sheldrick, 2008). The computing molecular graphics were prepared with ORTEP diagram using Mercury software (Mercury CSD 3.10.3 (Build 205818)).

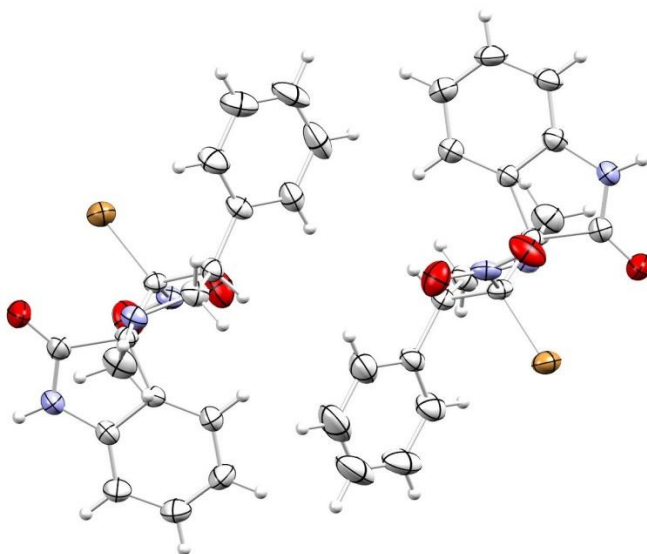

Figure S1: ORTEP representation of compound **13a**

### Instrumental details about crystal **13I**

Good quality single crystals were collected under an optical microscope equipped with polarizer. A high resolution data set of crystal  $C_{19}H_{18}FN_3O_3$  was collected on an Oxford Xcaliber Mova diffractometer equipped with an EOS CCD detector using  $MoK\alpha$  radiation ( $\lambda=0.71073 \text{ \AA}$ ) and a Mova microsource. The single crystal was affixed to a Hampton Research cryoloop using Paratone-N oil and was cooled with a liquid nitrogen stream using an Oxford Cryosystem nitrogen gas-stream cooling device. Data collection and reduction was performed using CrysAlisPro (version 1.171.38.43). The structure was solved by direct methods using SHELXS-2013/1 (Sheldrick, 2008) and structures were refined by SHELXL-2016/6 (Sheldrick, 2016). The computing molecular graphics were with ORTEP diagram using Mercury software (Mercury CSD 3.10.3 (Build 205818)).

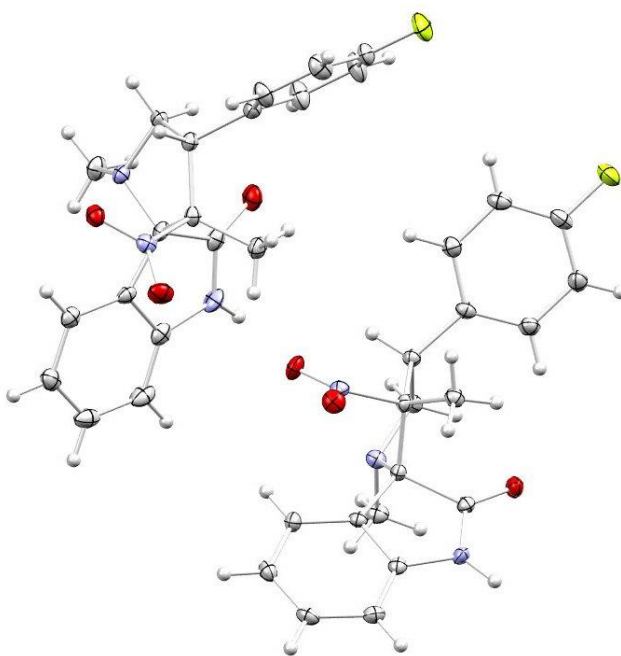

Figure S2: ORTEP representation of compound **13I**

### Instrumental details about crystal **14a**

Good quality single crystals were collected under an optical microscope equipped with polarizer. A high resolution data set of crystal  $C_{46}H_{45}Br_2N_6O_6$  was collected on an Oxford Xcaliber Mova diffractometer equipped with an EOS CCD detector using MoK $\alpha$  radiation ( $\lambda=0.71073 \text{ \AA}$ ) and a Mova microsource. The single crystal was affixed to a Hampton Research cryoloop using Paratone-N oil and was cooled with a liquid nitrogen stream using an Oxford Cryosystem nitrogen gas-stream cooling device. Data collection and reduction was performed using CrysAlisPro (version 1.171.38.43) and WINGX(version 2018.3). All non-hydrogen atoms were refined anisotropically. Hydrogen atoms on heteroatoms were located from difference electron density maps. All C-H atoms were fixed geometrically. The structure was solved by direct methods using SHELXS-2013/1 (Sheldrick, 2008) and structures were refined by SHELXL-2016/6 (Sheldrick, 2016). The computing molecular graphics were with Ortep diagram using Mercury software (Mercury CSD 3.10.3 (Build 205818)).

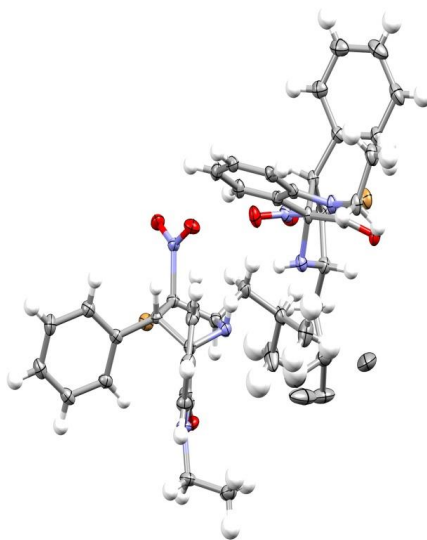

Figure S3: ORTEP representation of compound **14a**

| Identification code                     | <b>13a</b>                                                       | <b>13l</b>                                                     | <b>14a</b>                                                                    |
|-----------------------------------------|------------------------------------------------------------------|----------------------------------------------------------------|-------------------------------------------------------------------------------|
| Empirical formula                       | C <sub>18</sub> H <sub>16</sub> Br N <sub>3</sub> O <sub>3</sub> | C <sub>19</sub> H <sub>18</sub> FN <sub>3</sub> O <sub>3</sub> | C <sub>23</sub> H <sub>26</sub> Br <sub>2</sub> N <sub>3</sub> O <sub>3</sub> |
| Formula weight                          | 804.50                                                           | 355.36                                                         | 937.70                                                                        |
| Temperature/K                           | 296(2) K                                                         | 99.97(10)                                                      | 99.97(10)                                                                     |
| Crystal system                          | Monoclinic                                                       | Monoclinic                                                     | Monoclinic                                                                    |
| Space group                             | P12(1)/n1                                                        | P 21/n                                                         | C 2/c                                                                         |
| a/Å                                     | 15.516(5) Å                                                      | 19.0038(6) Å                                                   | 24.8162(5) Å                                                                  |
| b/Å                                     | 9.876(4) Å                                                       | 7.3040(2) Å                                                    | 11.0757(2) Å                                                                  |
| c/Å                                     | 23.035(7) Å                                                      | 25.2096(7) Å                                                   | 34.2851(7) Å                                                                  |
| α/°                                     | 90°                                                              | 90°                                                            | 90°                                                                           |
| β/°                                     | 104.61(2)°                                                       | 108.964(3)°                                                    | 100.280(2)°                                                                   |
| γ/°                                     | 90°                                                              | 90°                                                            | 90°                                                                           |
| Volume/Å <sup>3</sup>                   | 3415.8(19) Å <sup>3</sup>                                        | 3309.26(18) Å <sup>3</sup>                                     | 9272.2(3) Å <sup>3</sup>                                                      |
| Z                                       | 4                                                                | 8                                                              | 8                                                                             |
| ρ <sub>calc</sub> /cm <sup>3</sup>      | 1.564 x 10 <sup>-9</sup>                                         | 1.427 x 10 <sup>-9</sup>                                       | 1.343 x 10 <sup>-9</sup>                                                      |
| μ/mm <sup>-1</sup>                      | 2.429 mm <sup>-1</sup>                                           | 0.106 mm <sup>-1</sup>                                         | 1.801 mm <sup>-1</sup>                                                        |
| F(000)                                  | 1632                                                             | 1488                                                           | 3848                                                                          |
| Crystal size/mm <sup>3</sup>            | 0.262 x 0.243 x 0.236                                            | 0.263 x 0.251 x 0.238                                          | 0.275 x 0.269 x 0.257                                                         |
| Radiation                               | MoKα ( □ □ 0.71073 Å)                                            | MoKα ( □ □ 0.71073 Å)                                          | MoKα ( □ □ 0.71073 Å)                                                         |
| 2θ range for data collection/°          | 1.82 to 27.75°                                                   | 3.418 to 27.482°                                               | 3.337 to 27.483°                                                              |
| Index ranges                            | -20<=h<=20, -<br>12<=k<=12, -<br>29<=l<=29                       | -24<=h<=24, -<br>9<=k<=9,<br>32<=l<=32                         | -32<=h<=32, -<br>-14<=k<=14,<br>-44<=l<=44                                    |
| Reflections collected                   | 54024                                                            | 46806                                                          | 67257                                                                         |
| Independent reflections                 | 7878 [R <sub>int</sub> = 0.0960]                                 | 7580 [R(int)= 0.0679]                                          | 10619 [R(int)= 0.0476]                                                        |
| Data/restraints/parameters              | 7878 / 0 / 453                                                   | 7580 / 0 / 480                                                 | 10619 / 0 / 568                                                               |
| Goodness-of-fit on F <sup>2</sup>       | 0.897                                                            | 1.036                                                          | 1.077                                                                         |
| Final R indexes [I>=2σ(I)]              | R <sub>1</sub> = 0.0499, wR2 = 0.1295                            | R <sub>1</sub> = 0.0464, wR2 = 0.0959                          | R <sub>1</sub> = 0.0512, wR2 = 0.1577                                         |
| Final R indexes [all data]              | R <sub>1</sub> = 0.0991, wR2 = 0.1566                            | R <sub>1</sub> = 0.0639, wR2 = 0.1069                          | R <sub>1</sub> = 0.0604, wR2 = 0.1653                                         |
| Largest diff. peak/hole/eÅ <sup>3</sup> | 0.524 and -0.669 e.Å <sup>-3</sup>                               | 0.301 and -0.239 e.Å <sup>-3</sup>                             | 3.621 and -0.407 e.Å <sup>-3</sup>                                            |
| <b>CCDC</b>                             | 1887027                                                          | 1886930                                                        | 1895444                                                                       |

## II. Copies of NMR Spectra of 13a-13k

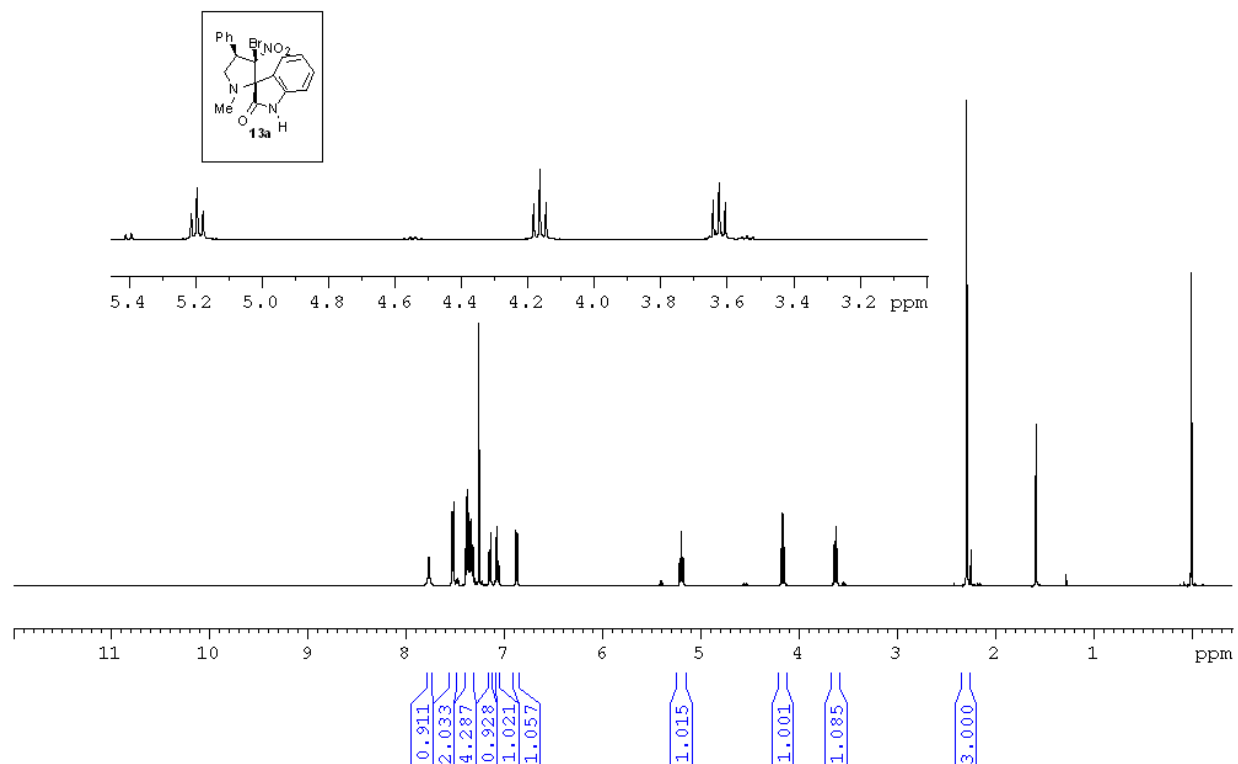

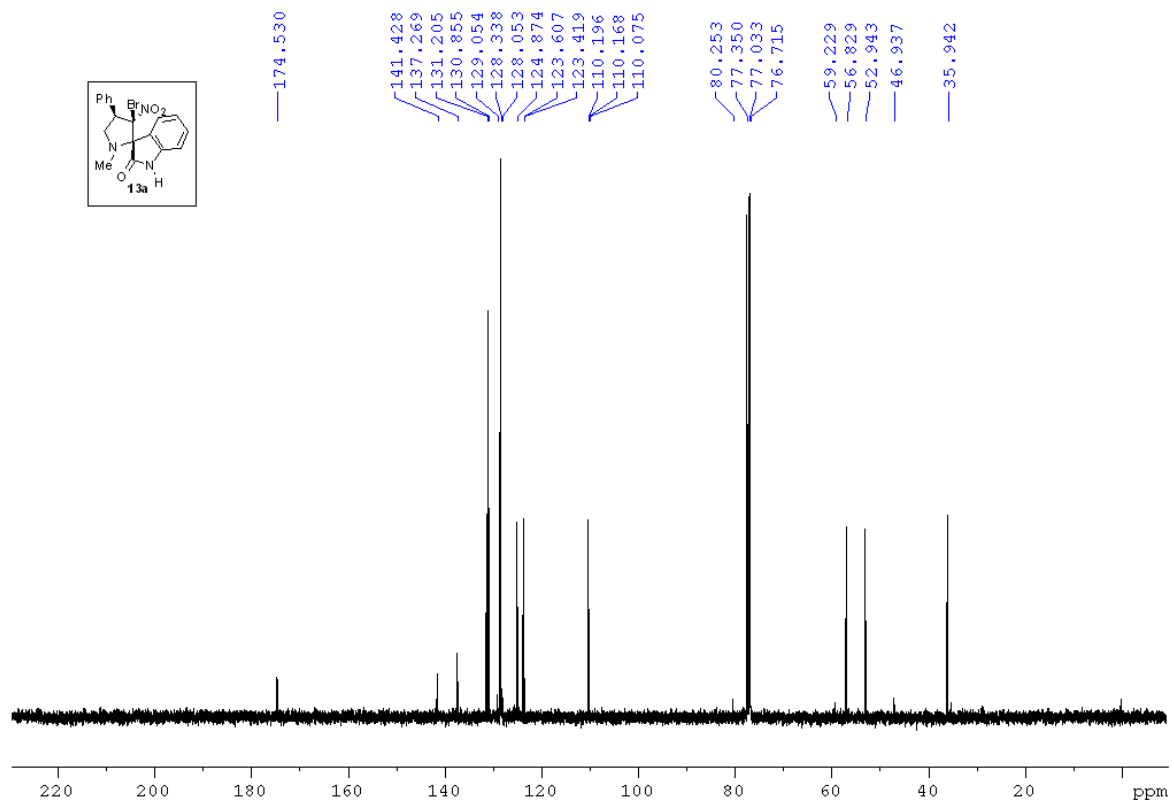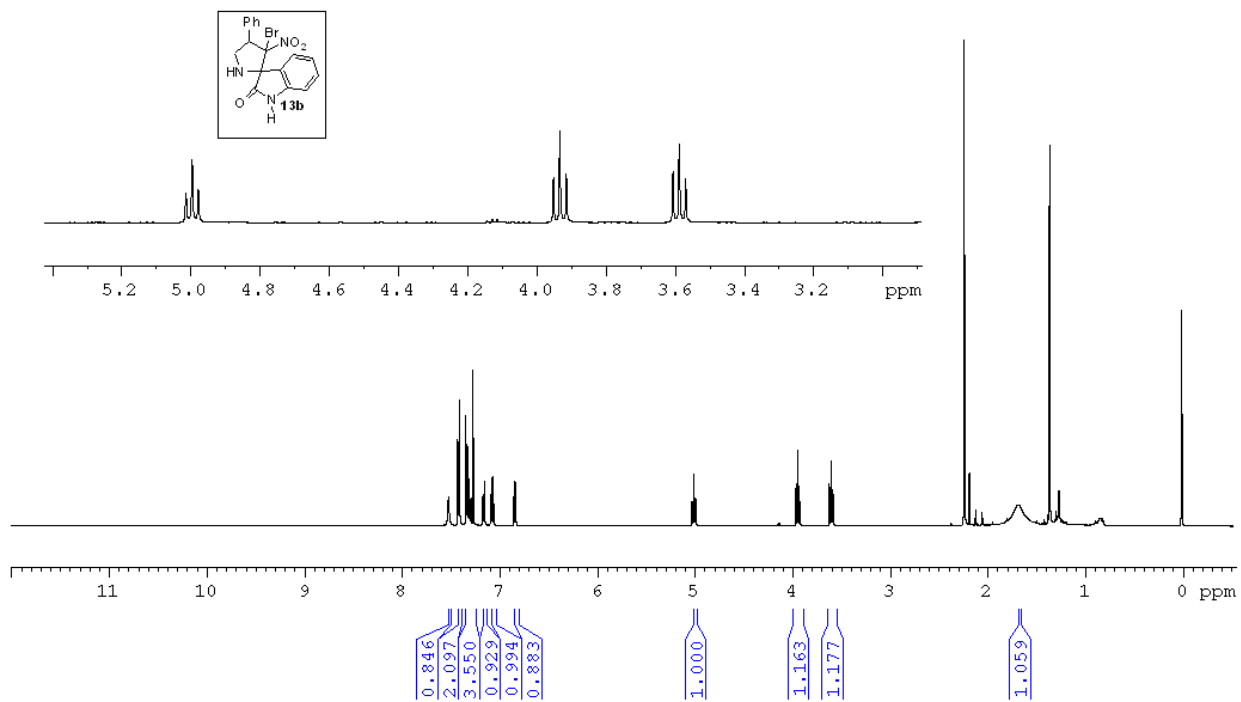

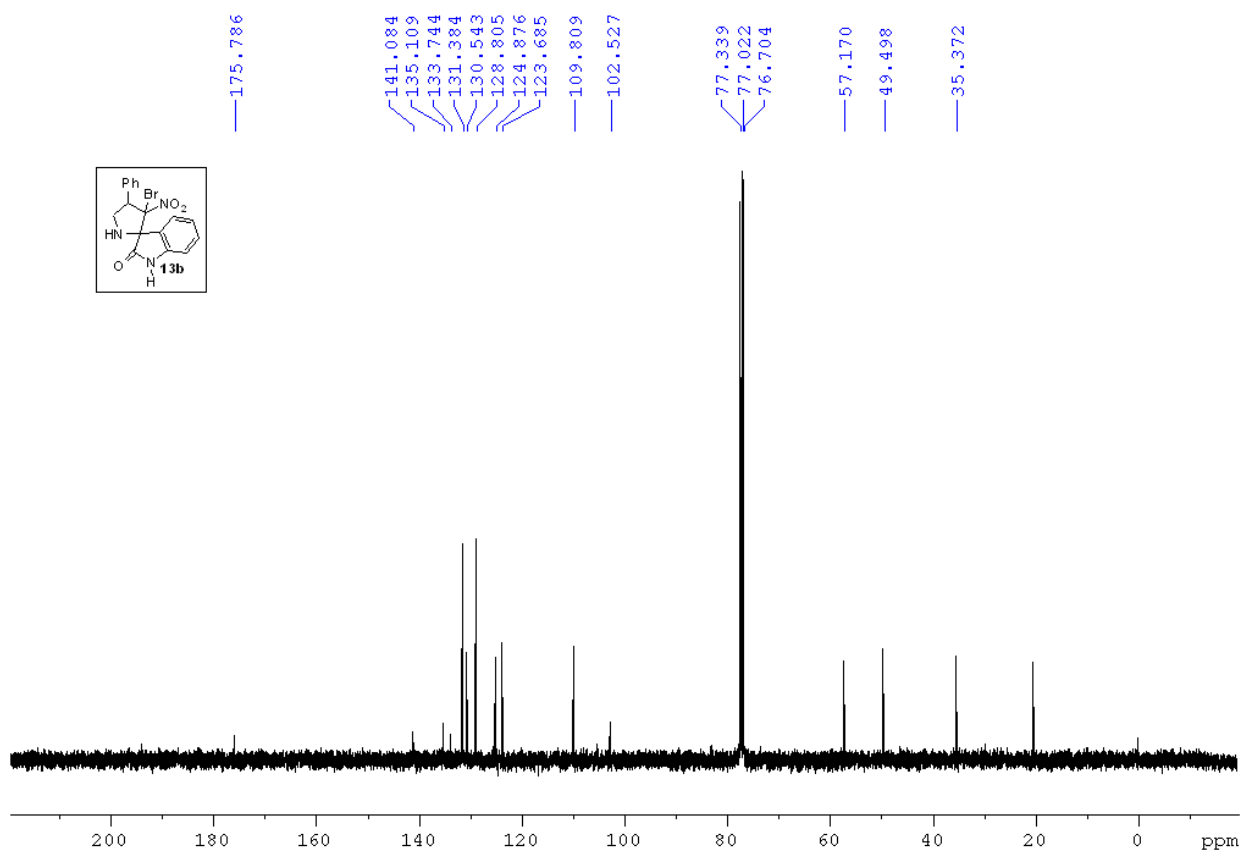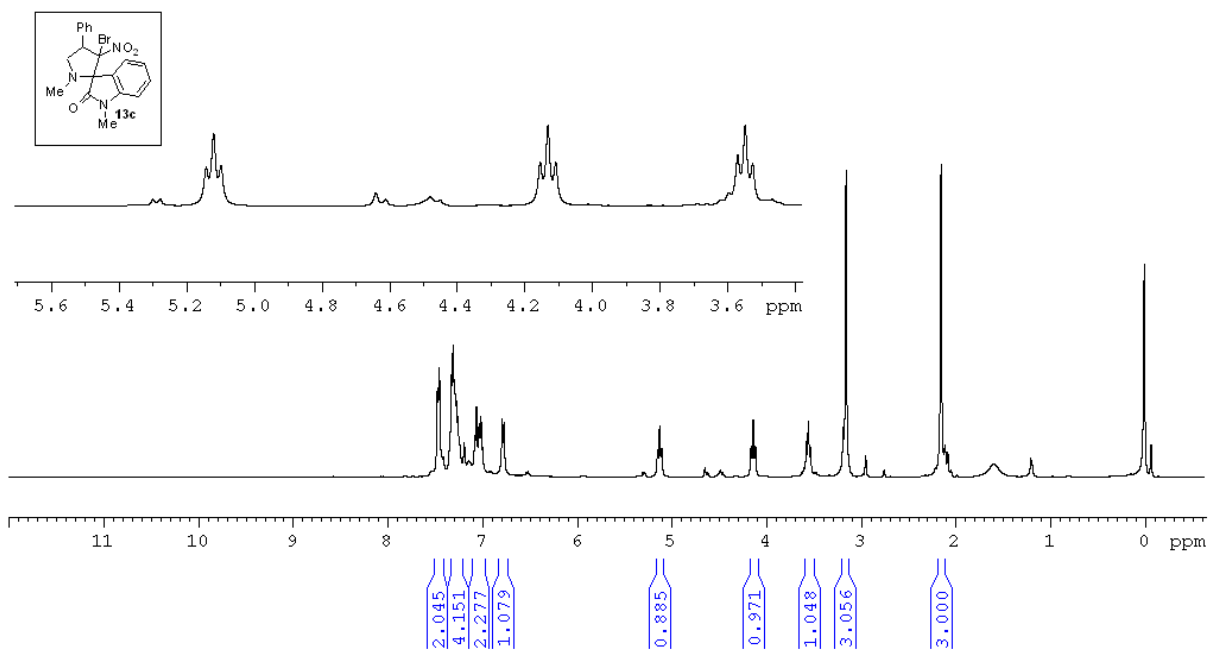



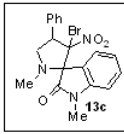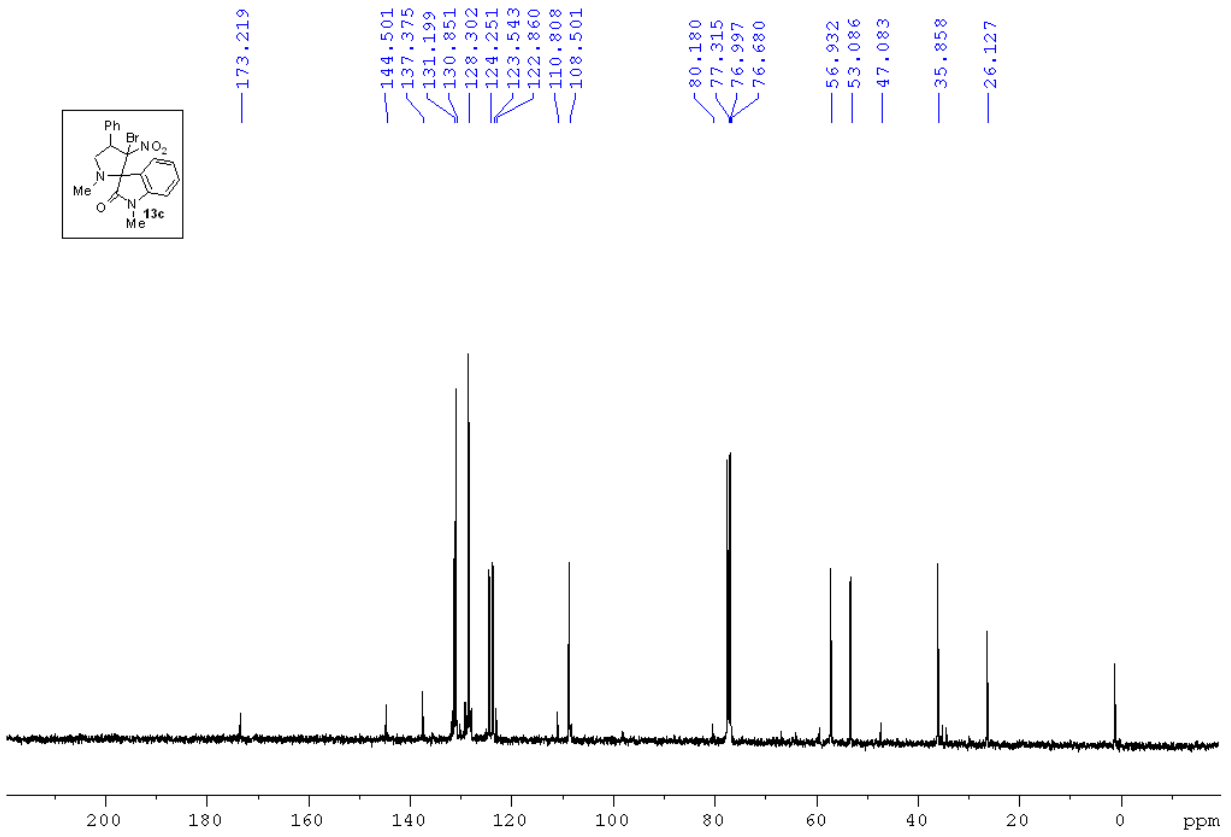

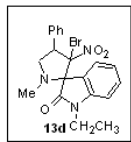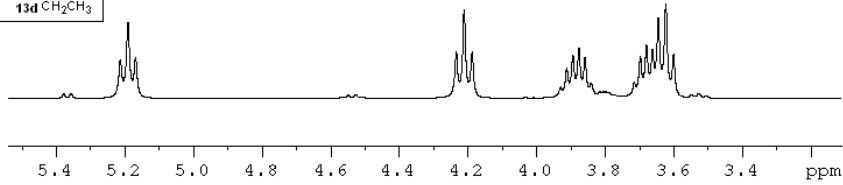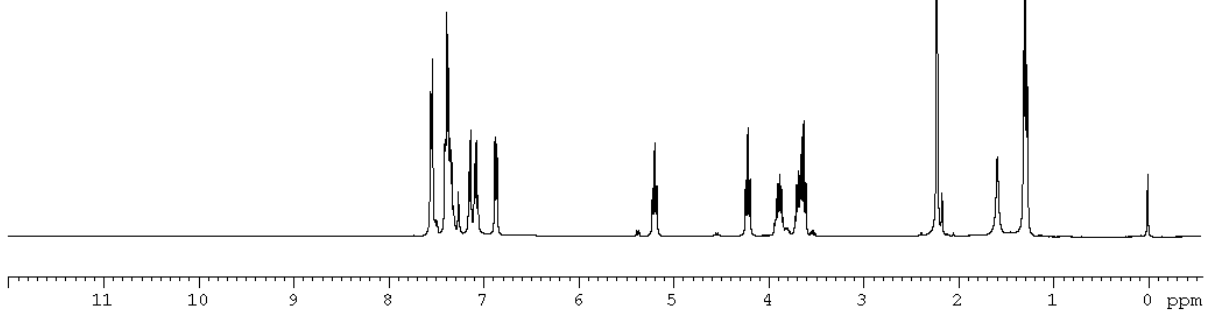

1.867  
3.747  
2.034  
0.990

0.949

1.047  
1.043  
2.067

2.997

3.137

172.756

143.595  
137.465  
131.149  
130.912  
128.295  
128.230  
124.438  
123.337  
123.039  
110.969  
108.575

79.841  
77.312  
76.994  
76.677

59.238  
56.981  
53.129  
46.920

35.764  
34.834

12.546

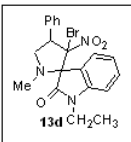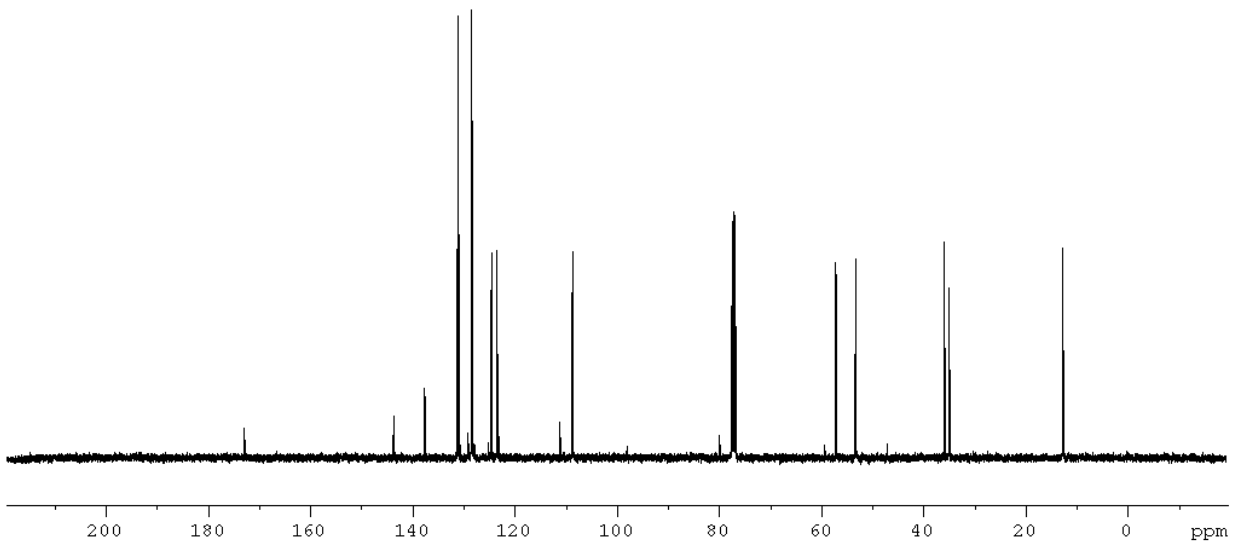

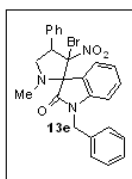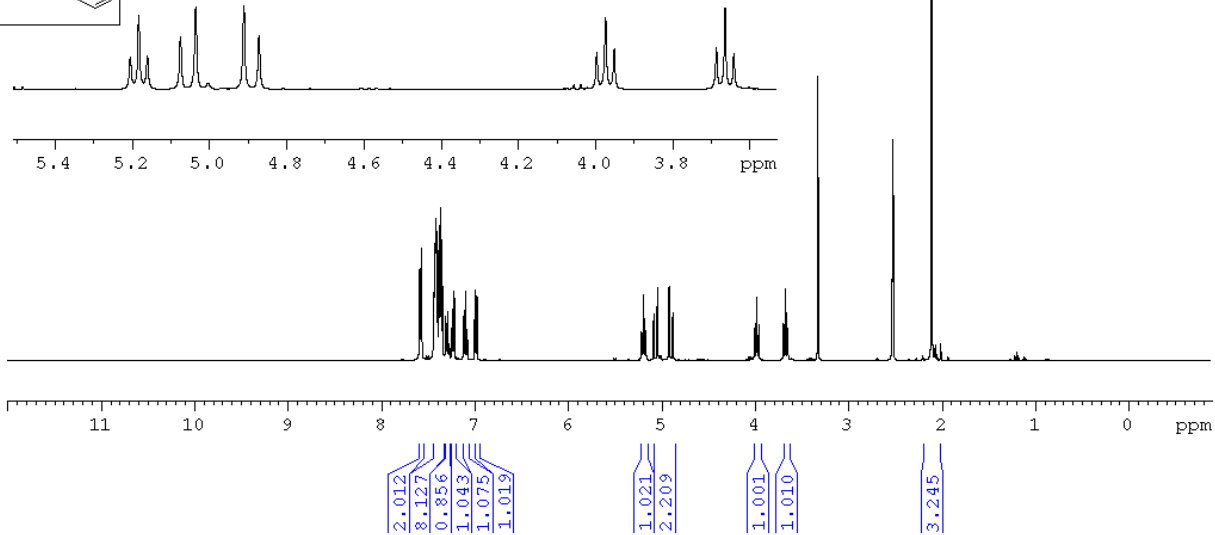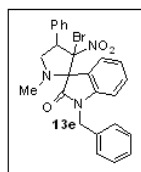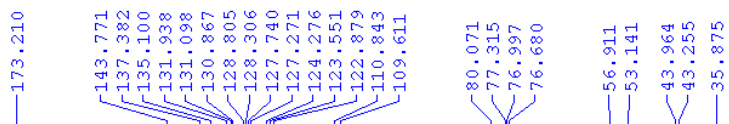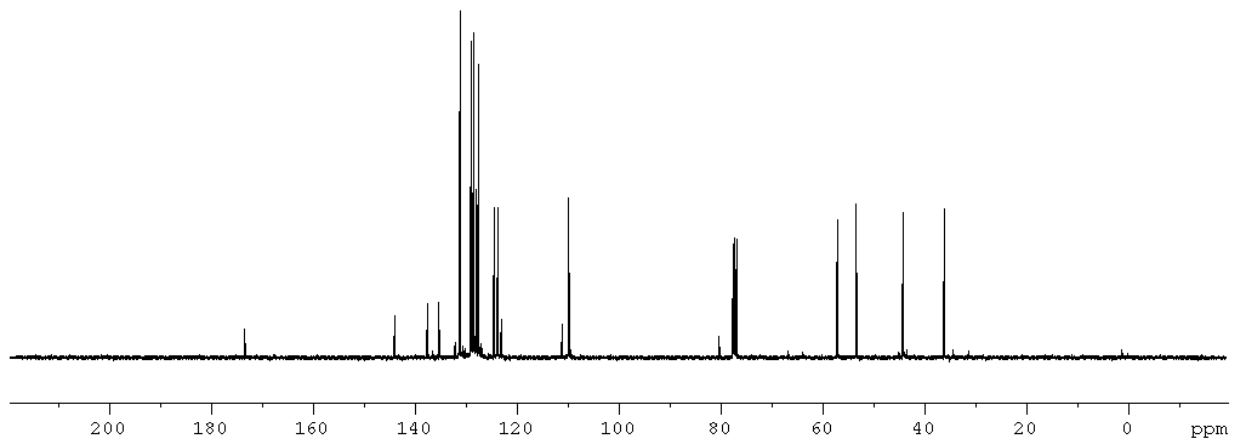

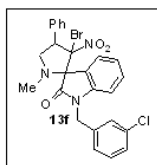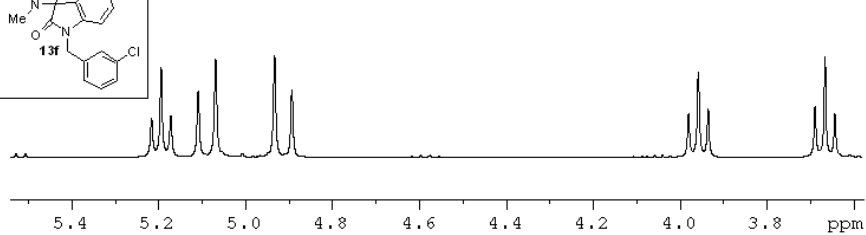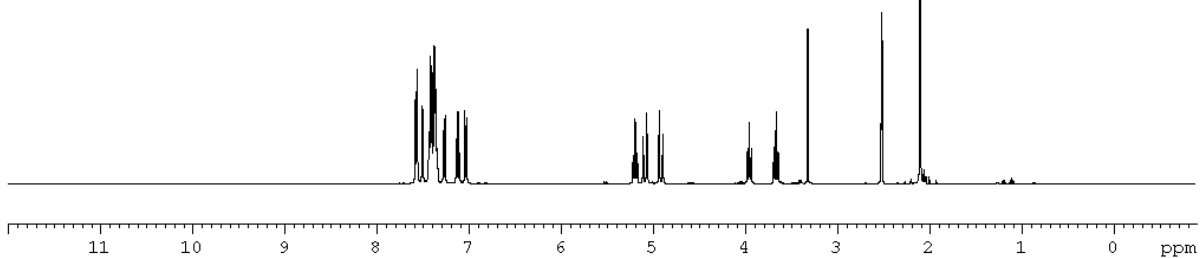

Integration values for the <sup>1</sup>H NMR spectrum:

- 2.153
- 0.999
- 7.065
- 1.068
- 1.135
- 1.090
- 1.076
- 2.331
- 1.064
- 1.073
- 3.041

Chemical shift values (ppm) for the <sup>13</sup>C NMR spectrum:

- 173.233
- 143.403
- 137.273
- 137.192
- 134.759
- 131.206
- 130.826
- 130.136
- 128.326
- 128.045
- 127.435
- 125.340
- 124.456
- 123.774
- 122.914
- 110.712
- 109.374
- 80.058
- 77.315
- 76.997
- 76.679
- 56.865
- 53.074
- 43.416
- 35.867
- 31.190

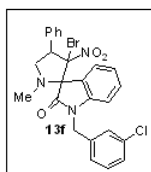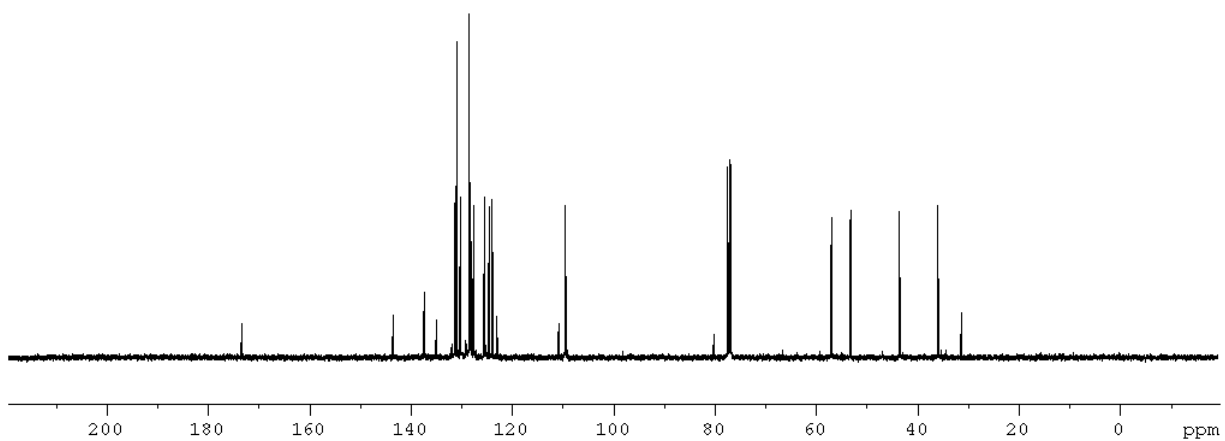

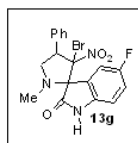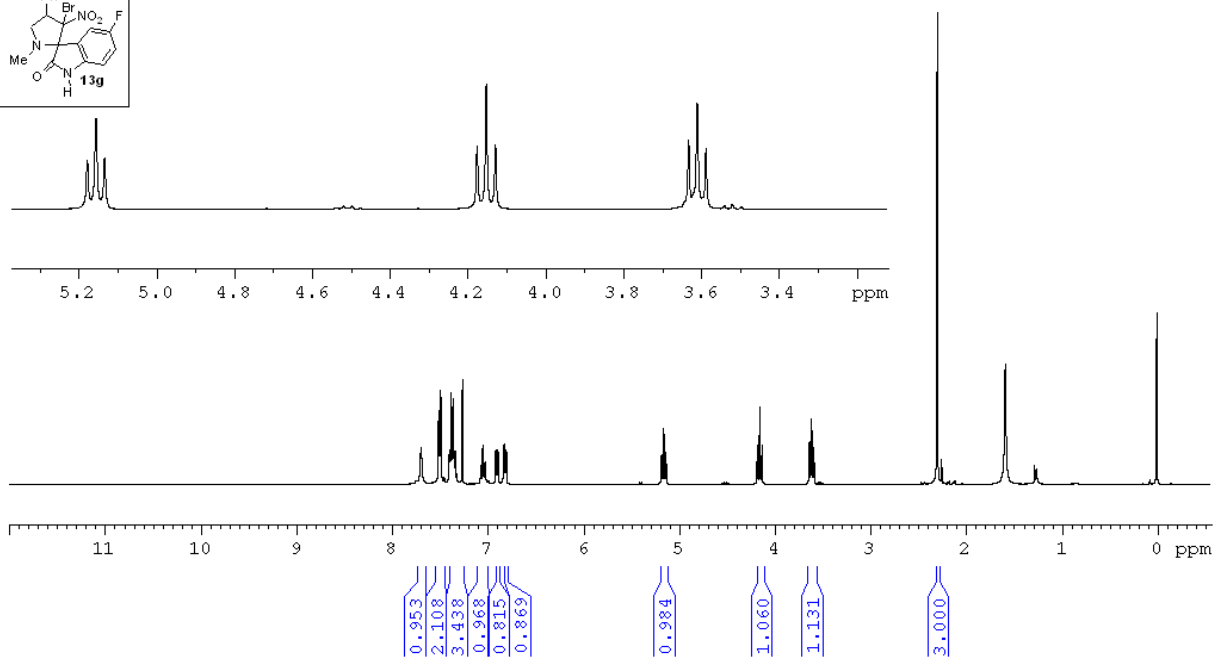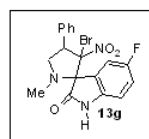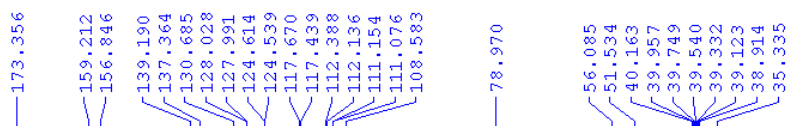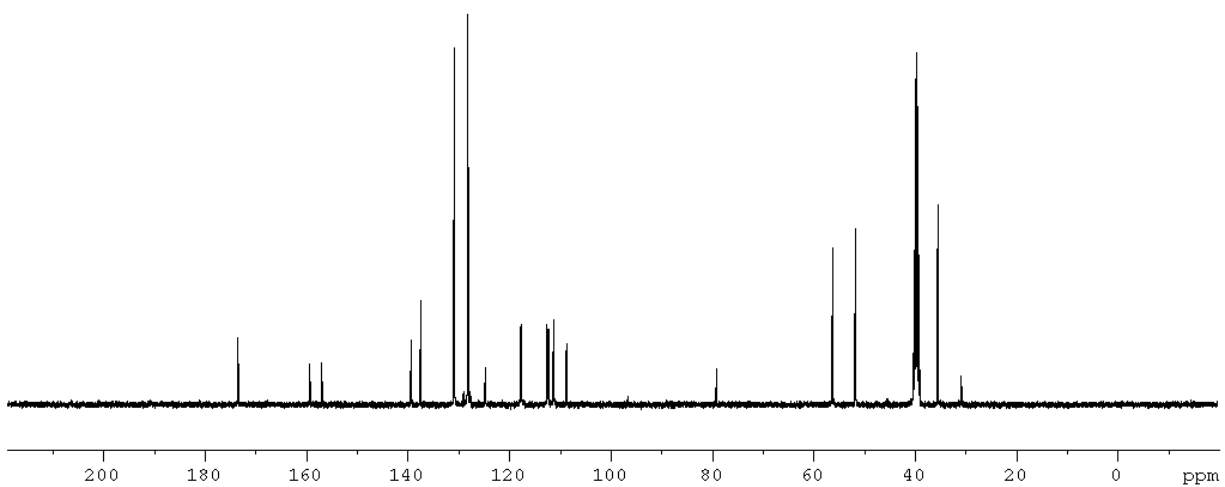

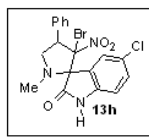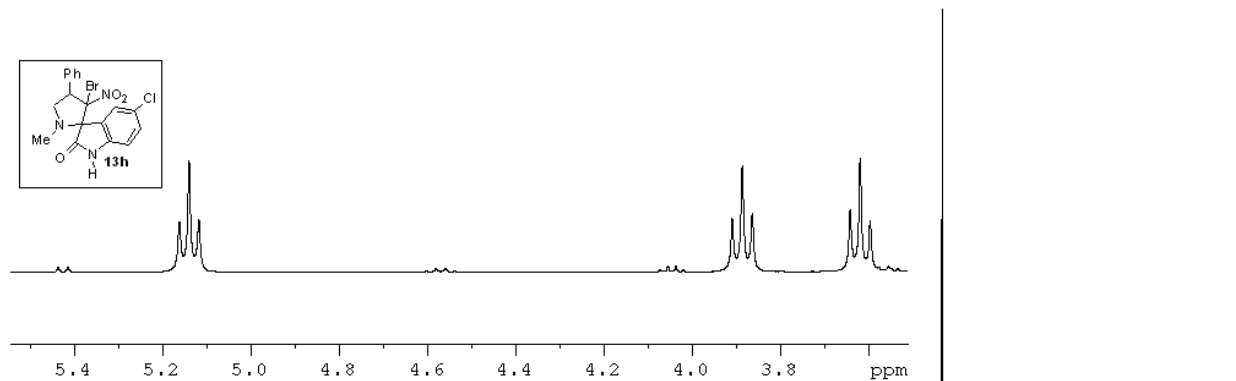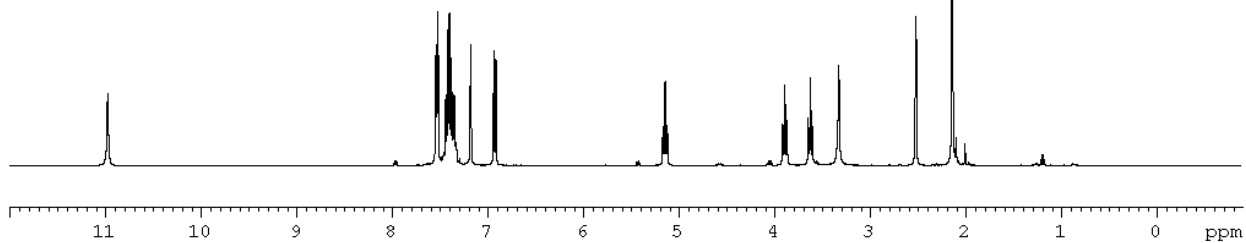

Integration values for the <sup>1</sup>H NMR spectrum:

- 1.002
- 2.262
- 4.257
- 1.018
- 1.127
- 1.133
- 1.118
- 1.135
- 3.241

Chemical shift values (ppm) for the <sup>13</sup>C NMR spectrum:

- 173.166
- 141.889
- 137.345
- 130.652
- 128.894
- 128.050
- 128.001
- 127.593
- 126.302
- 124.330
- 111.668
- 108.782
- 78.927
- 56.100
- 51.628
- 39.733
- 39.524
- 39.315
- 35.359

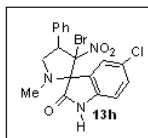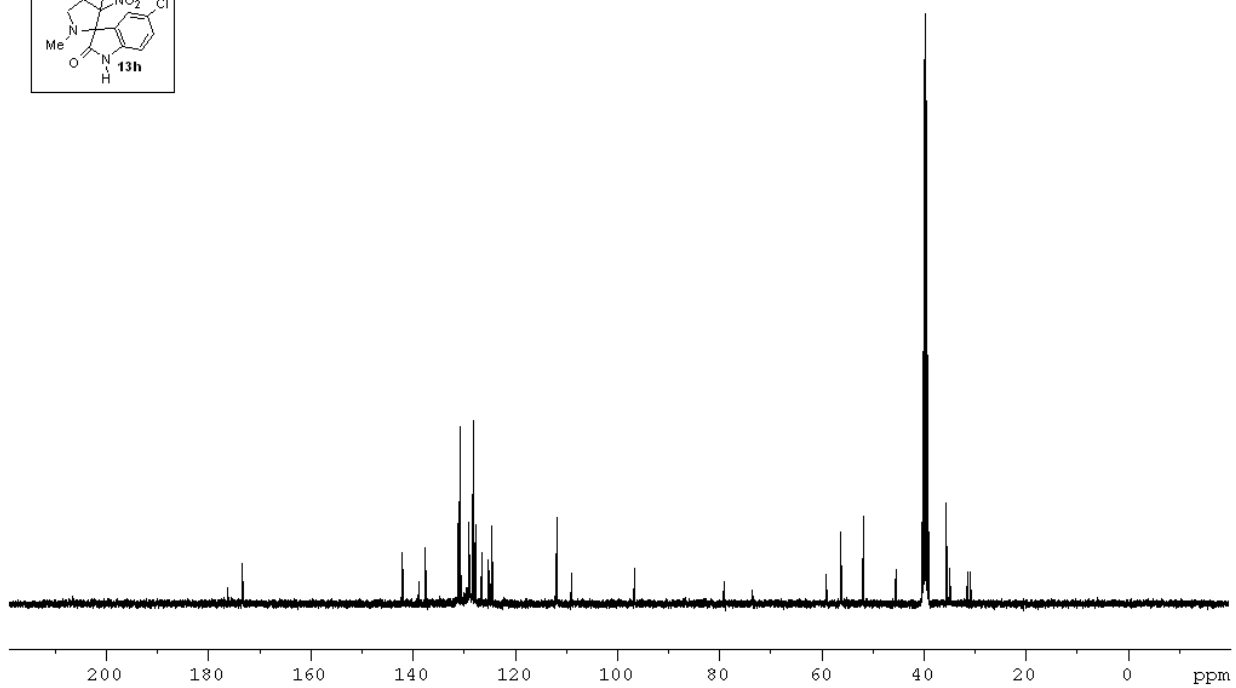

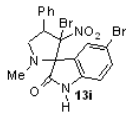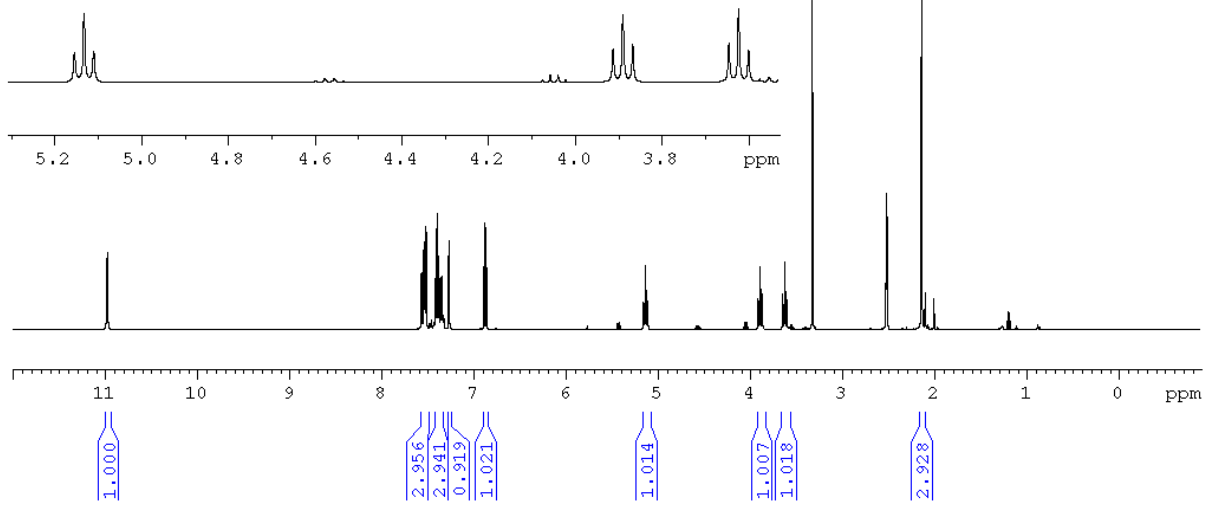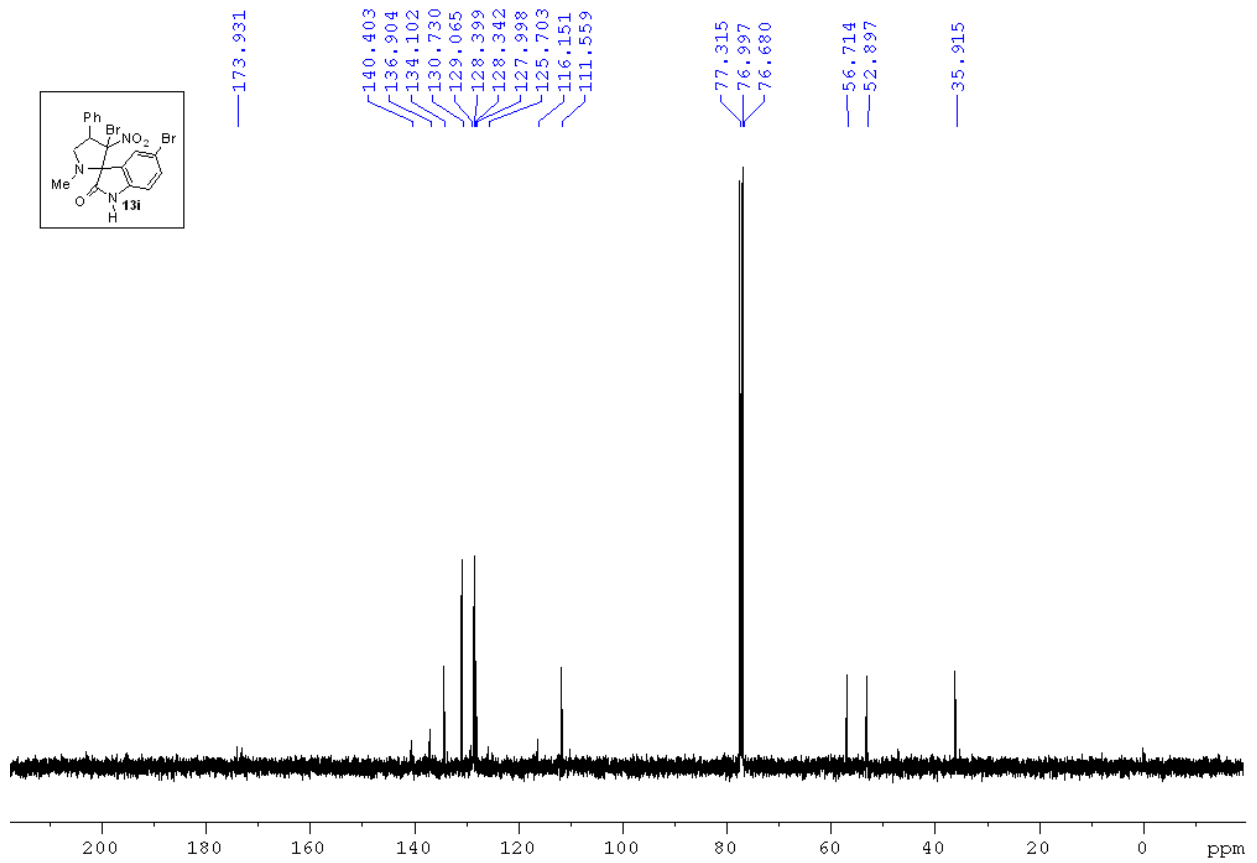

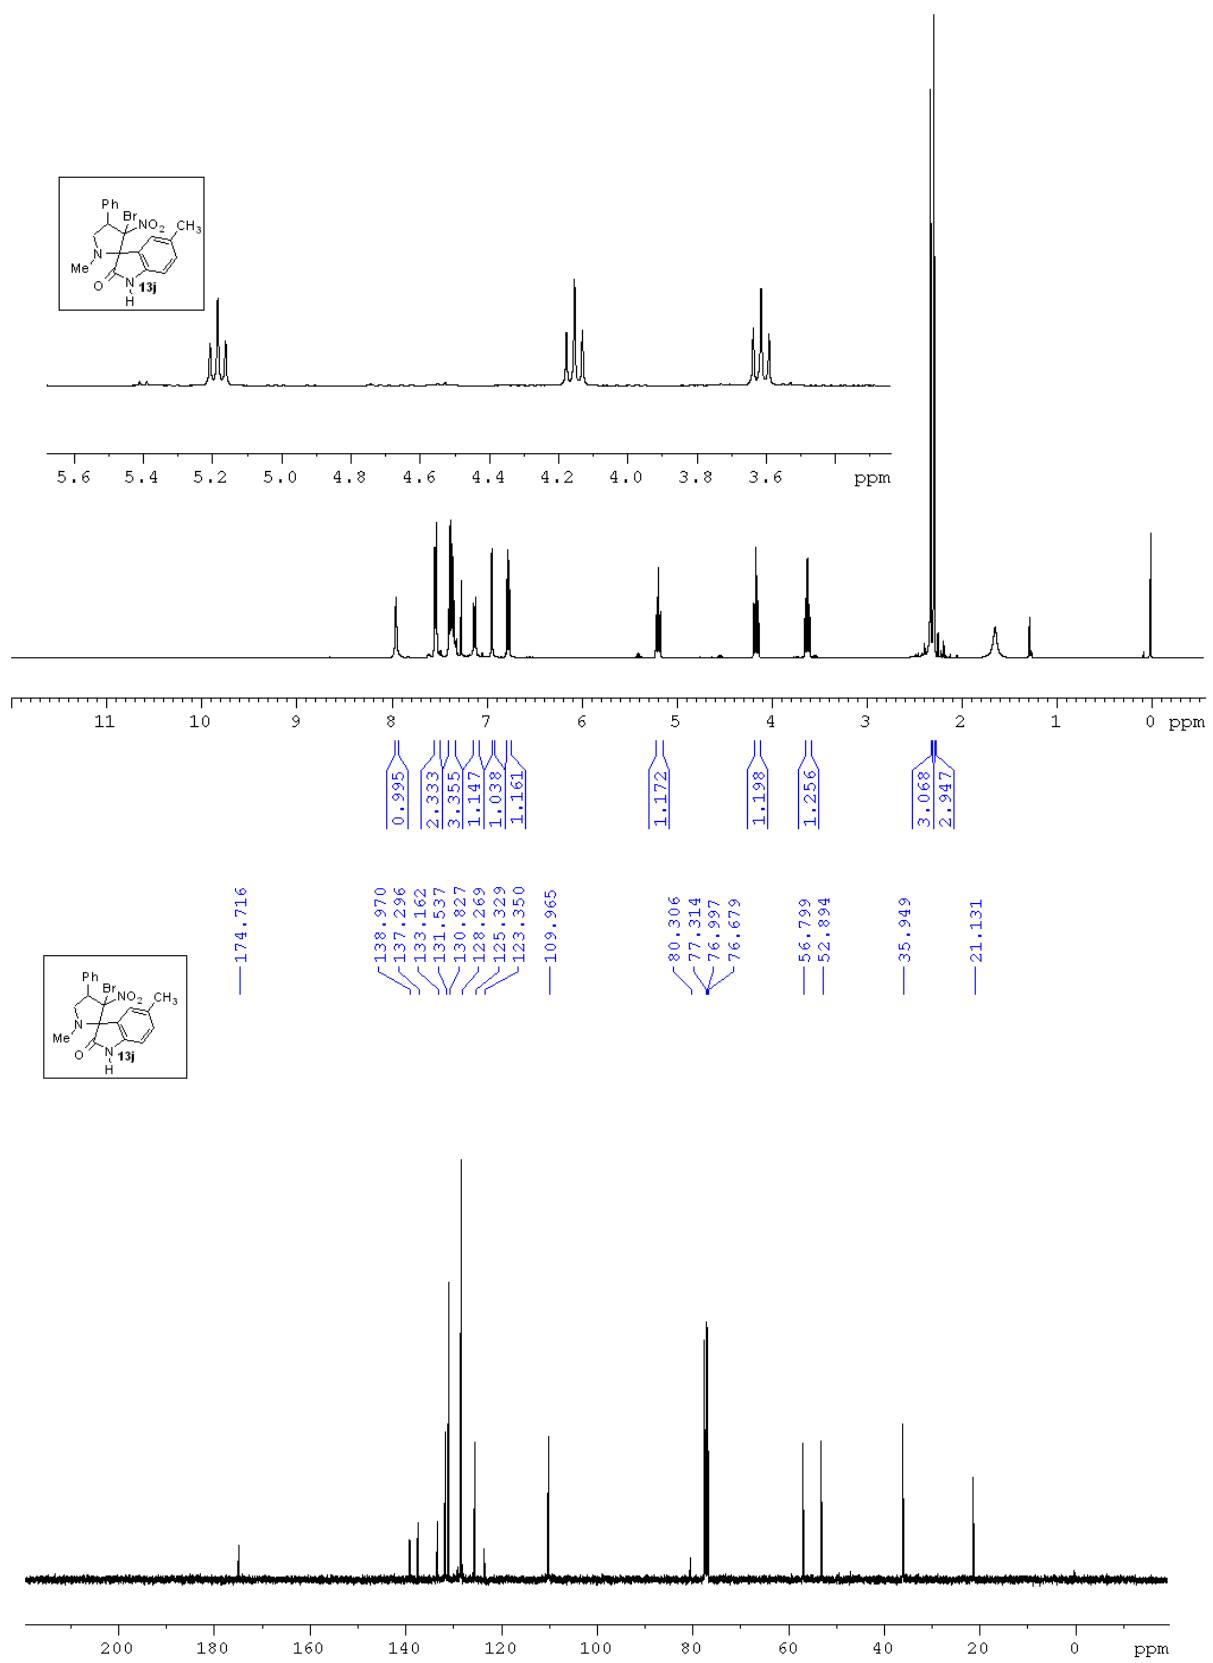



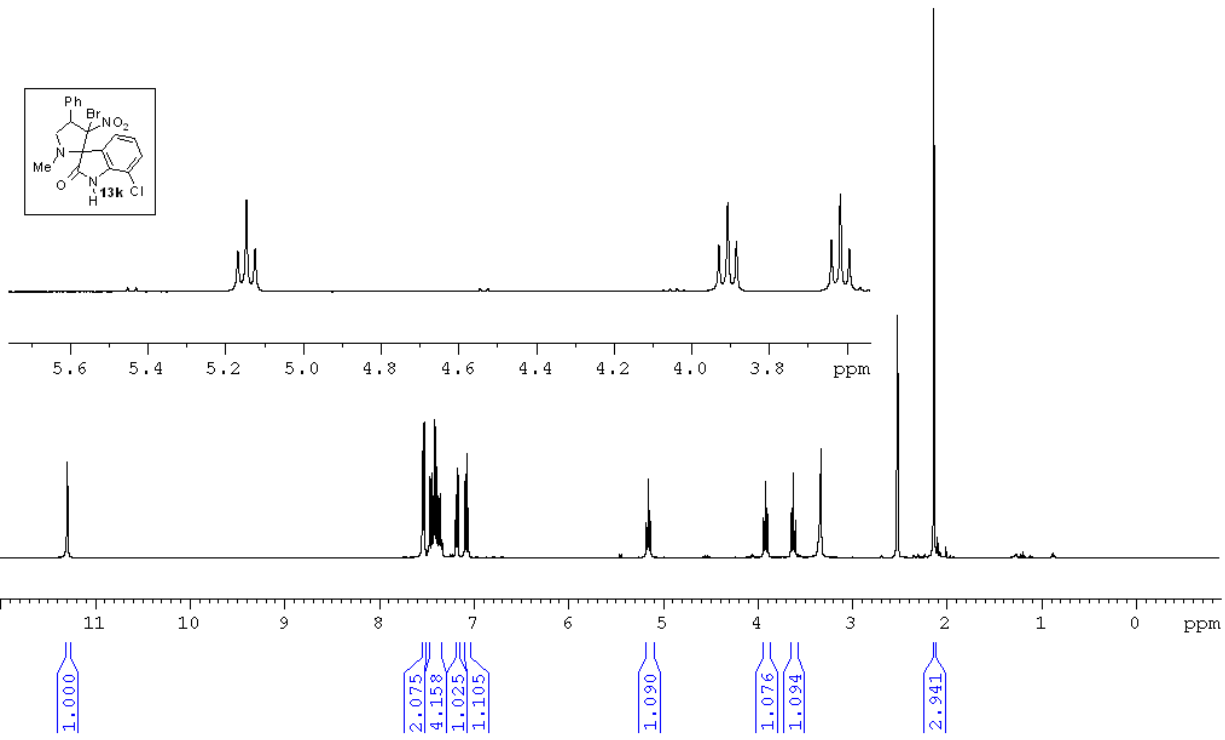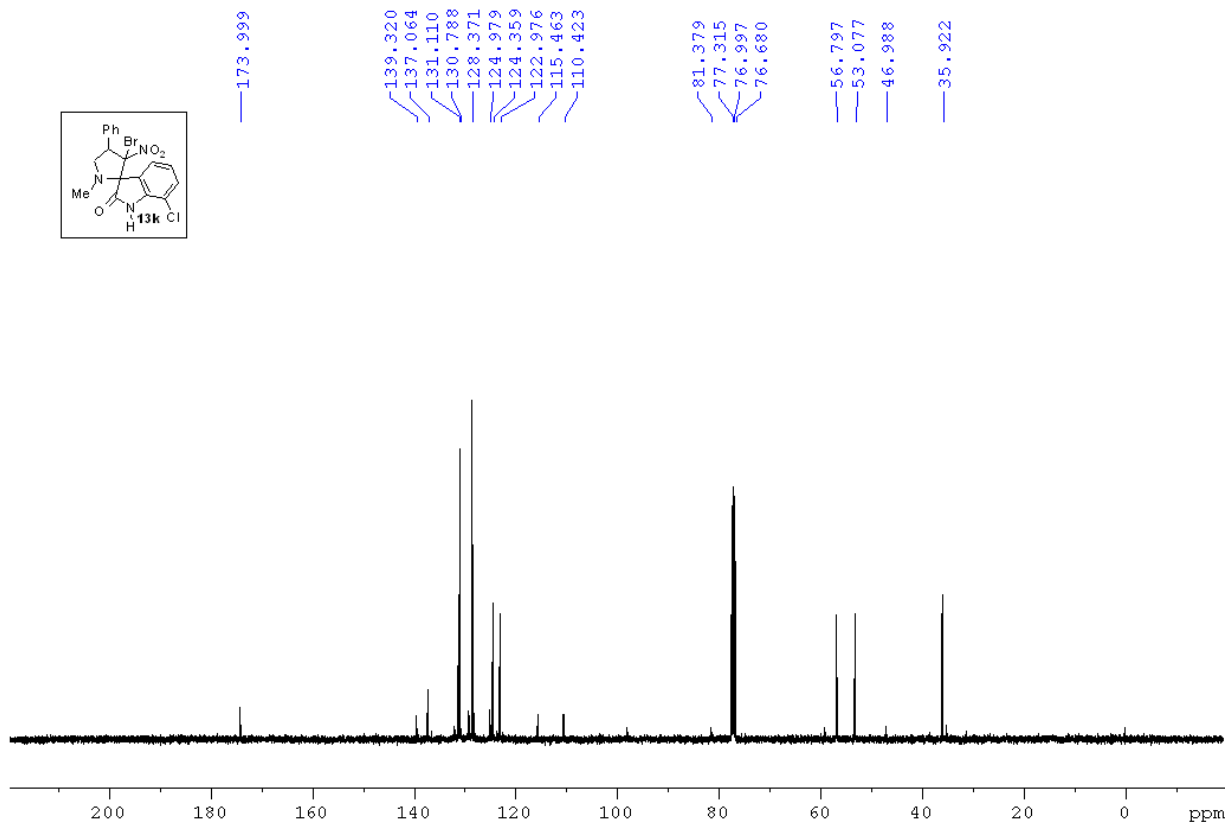



D<sub>2</sub>O exchange experiment for the compound **14a**

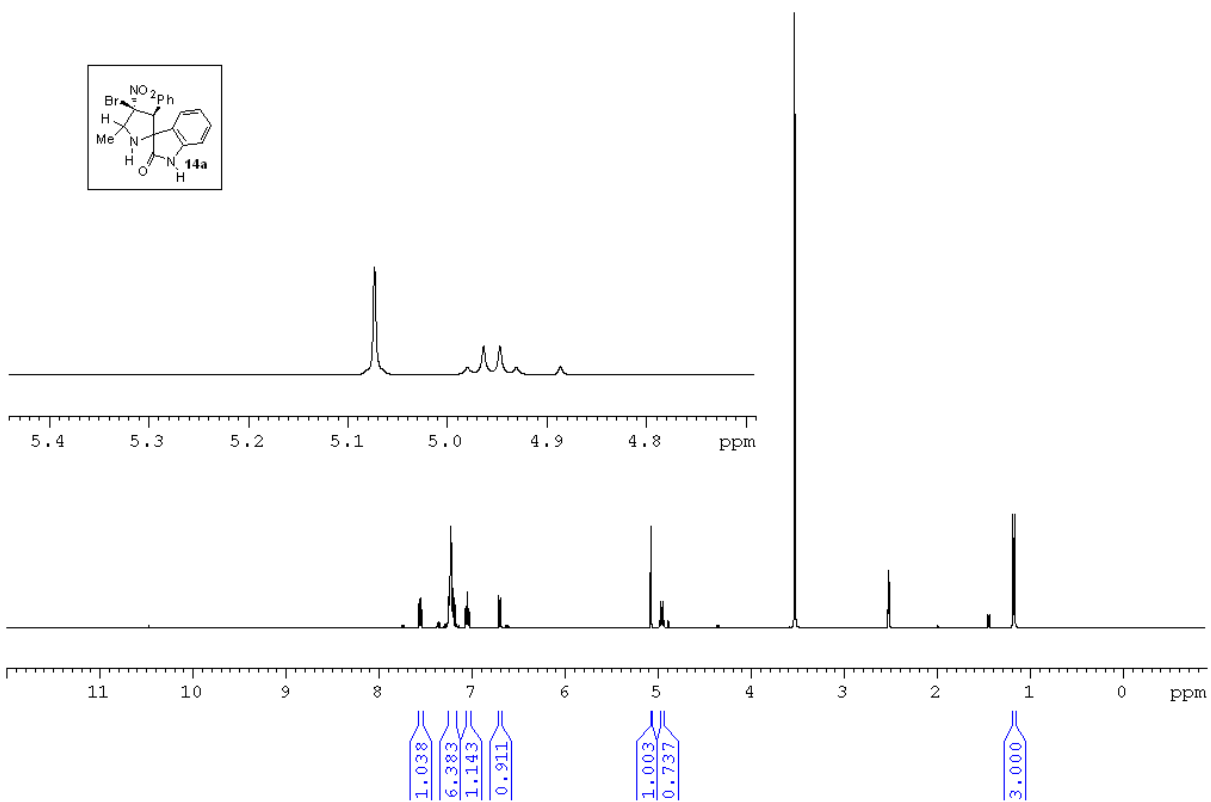

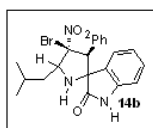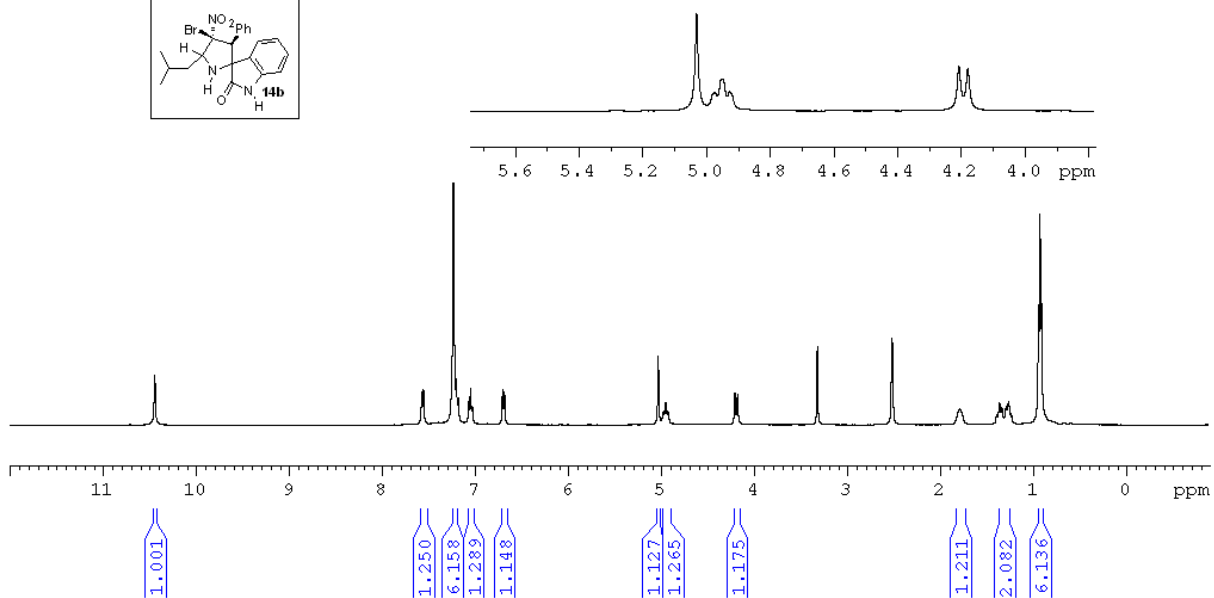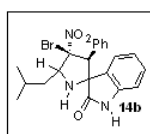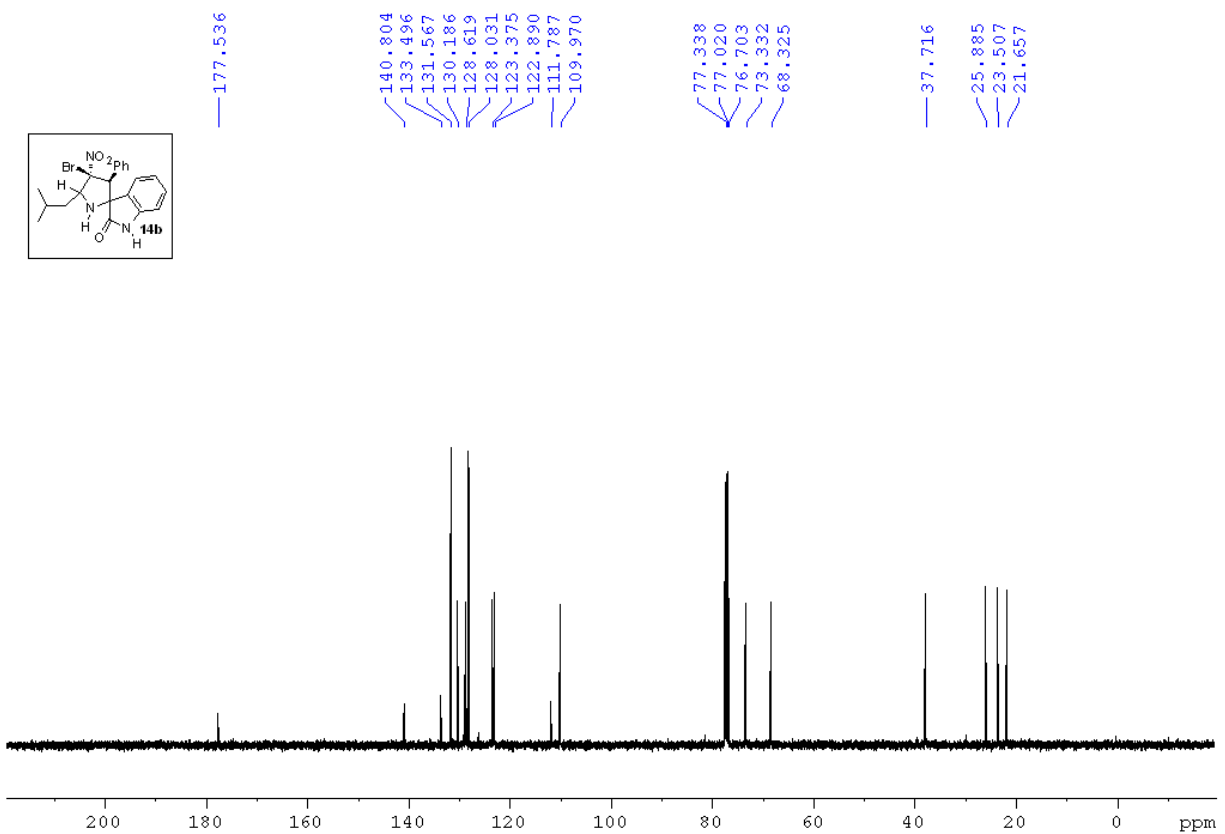

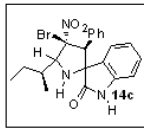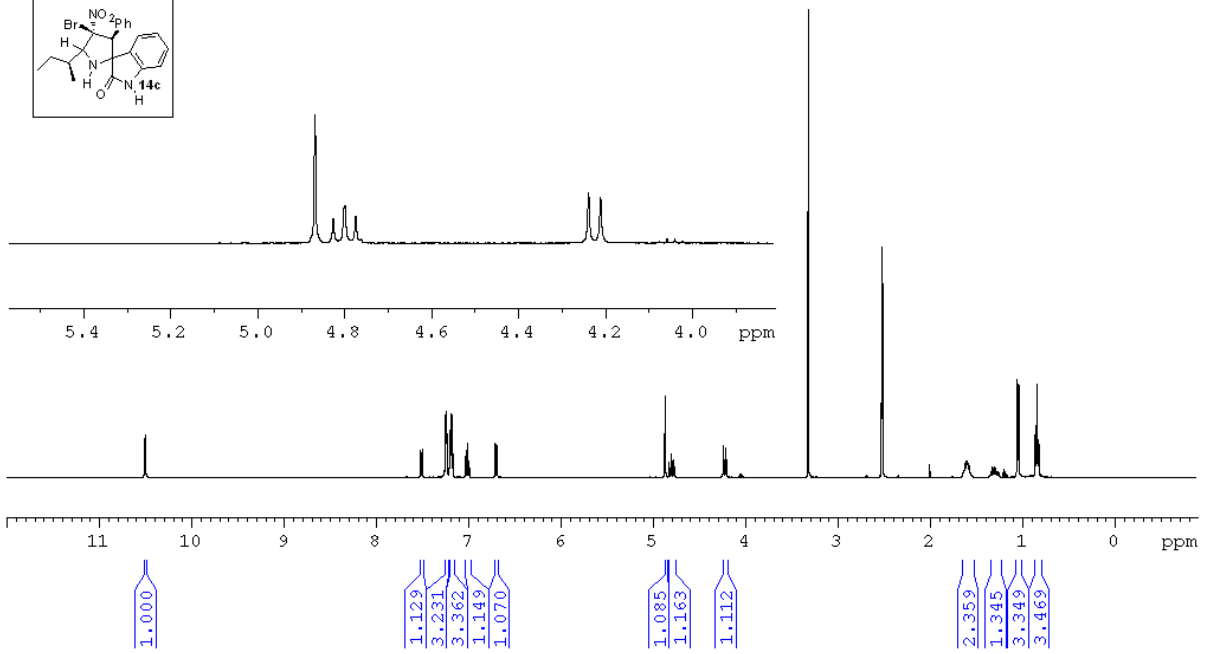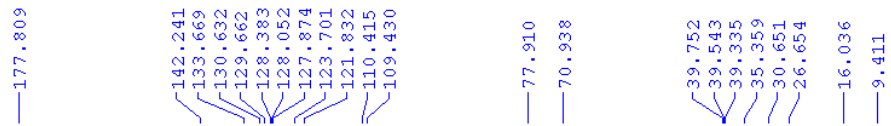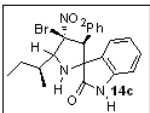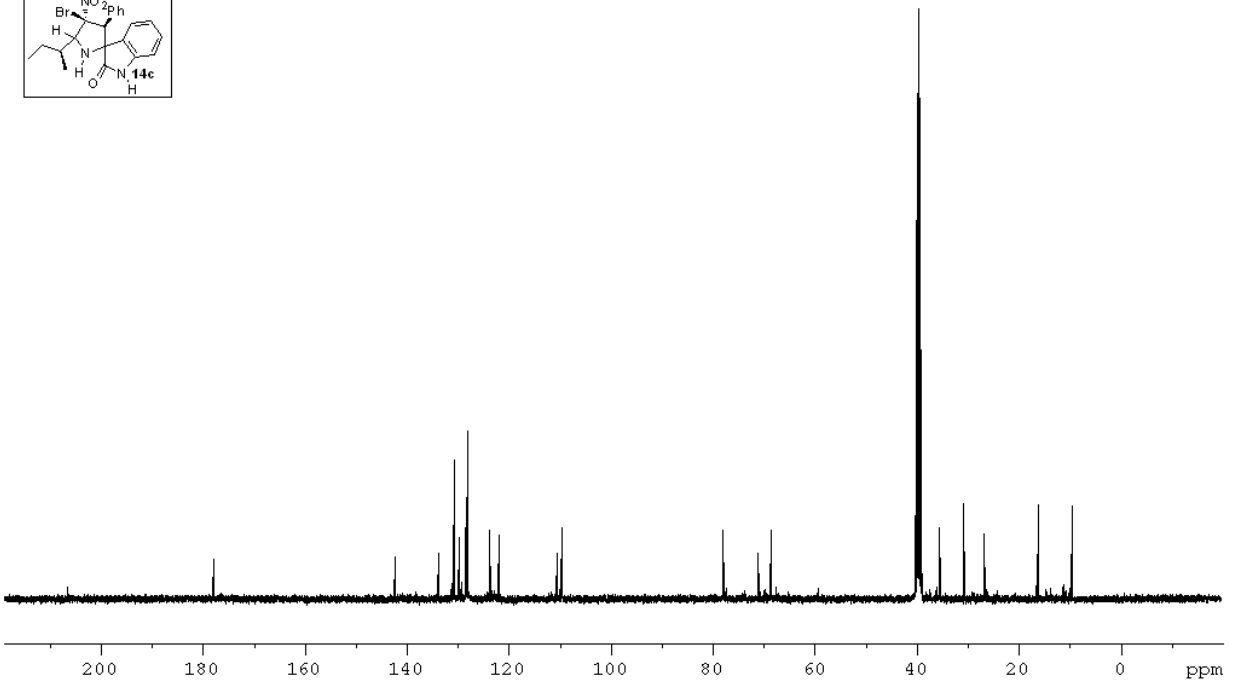

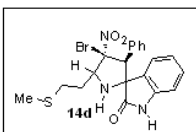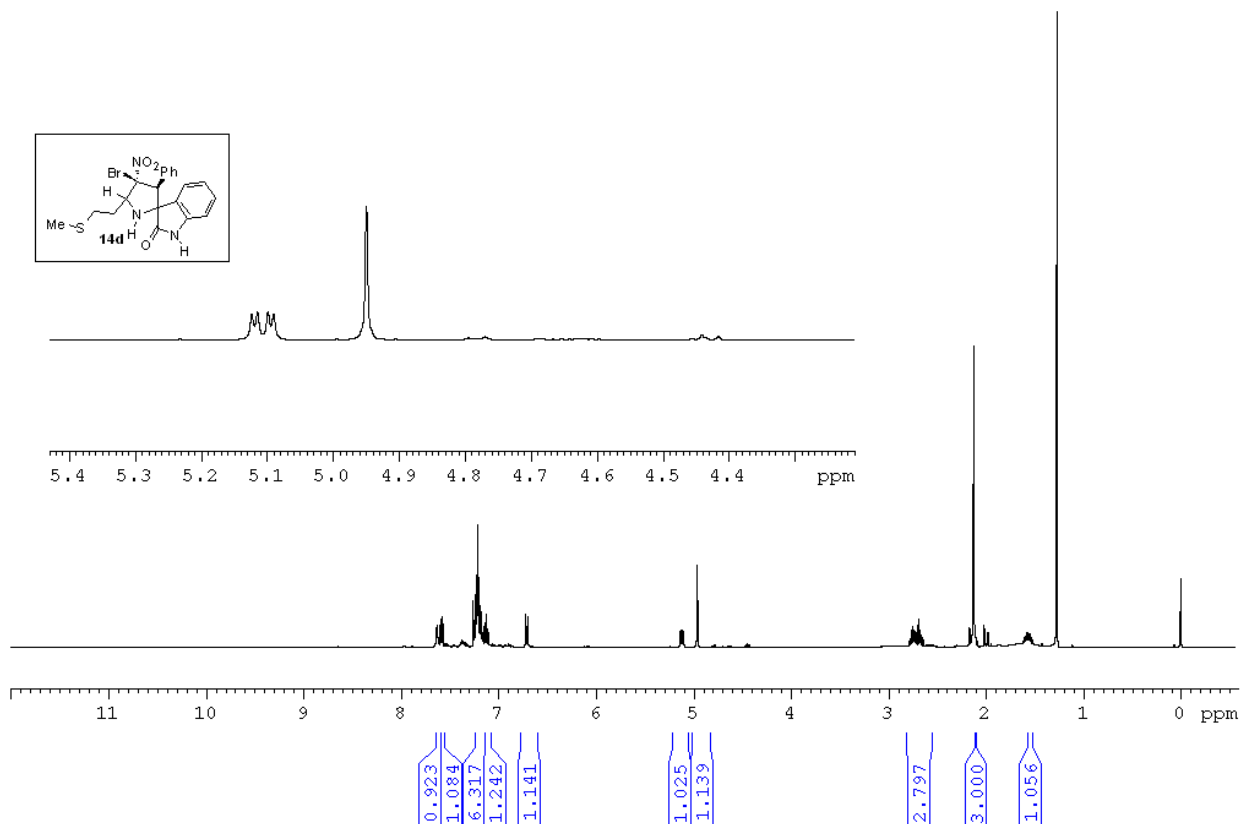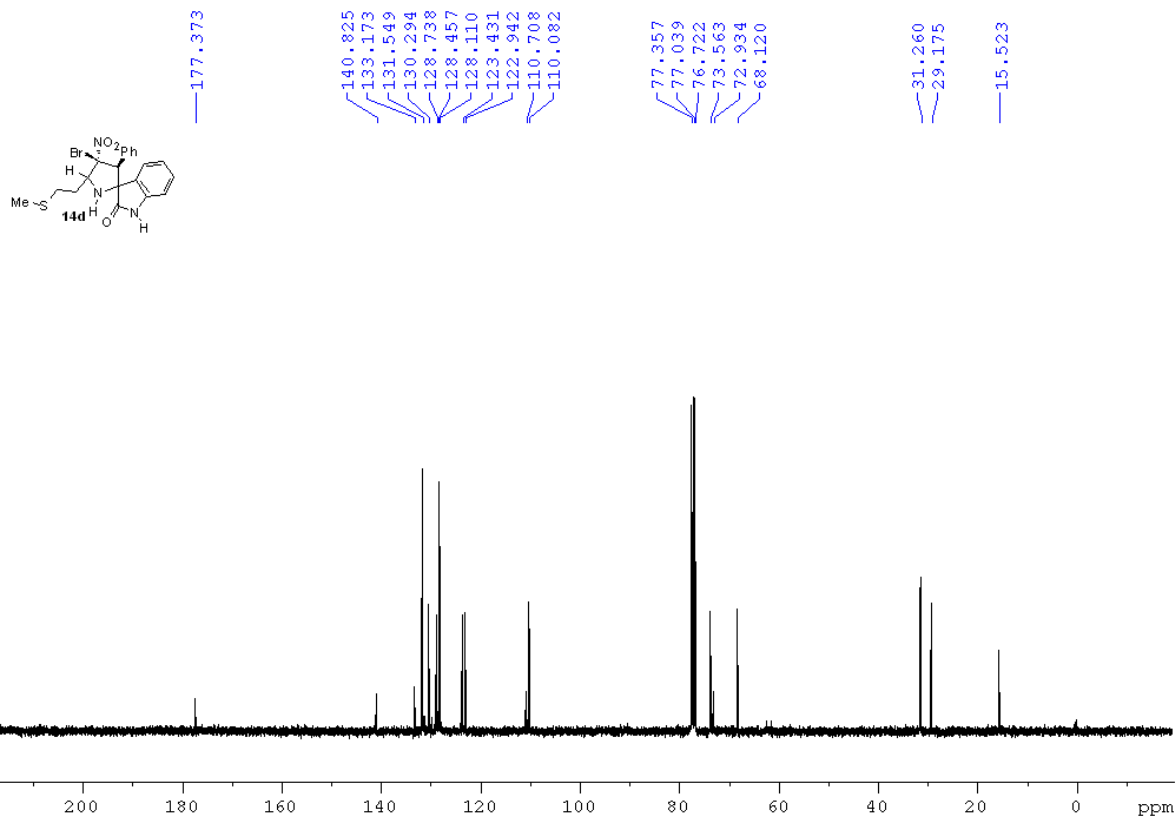

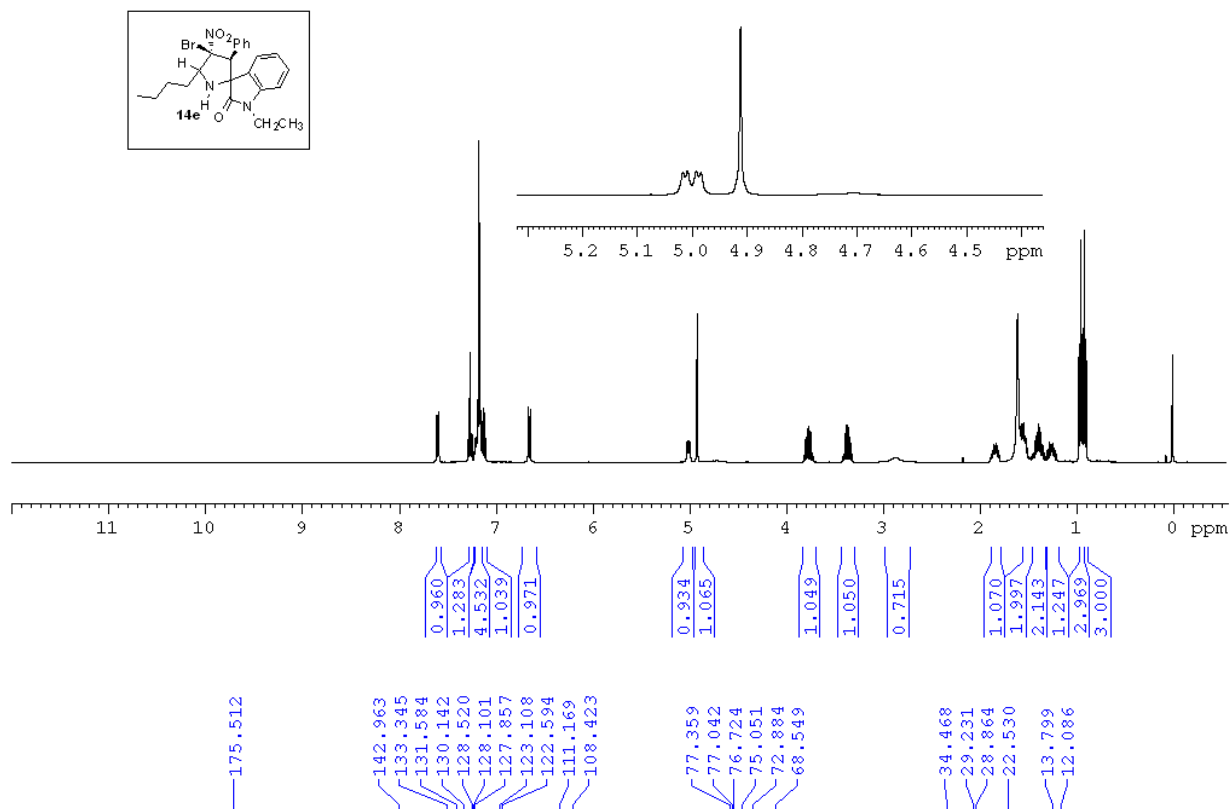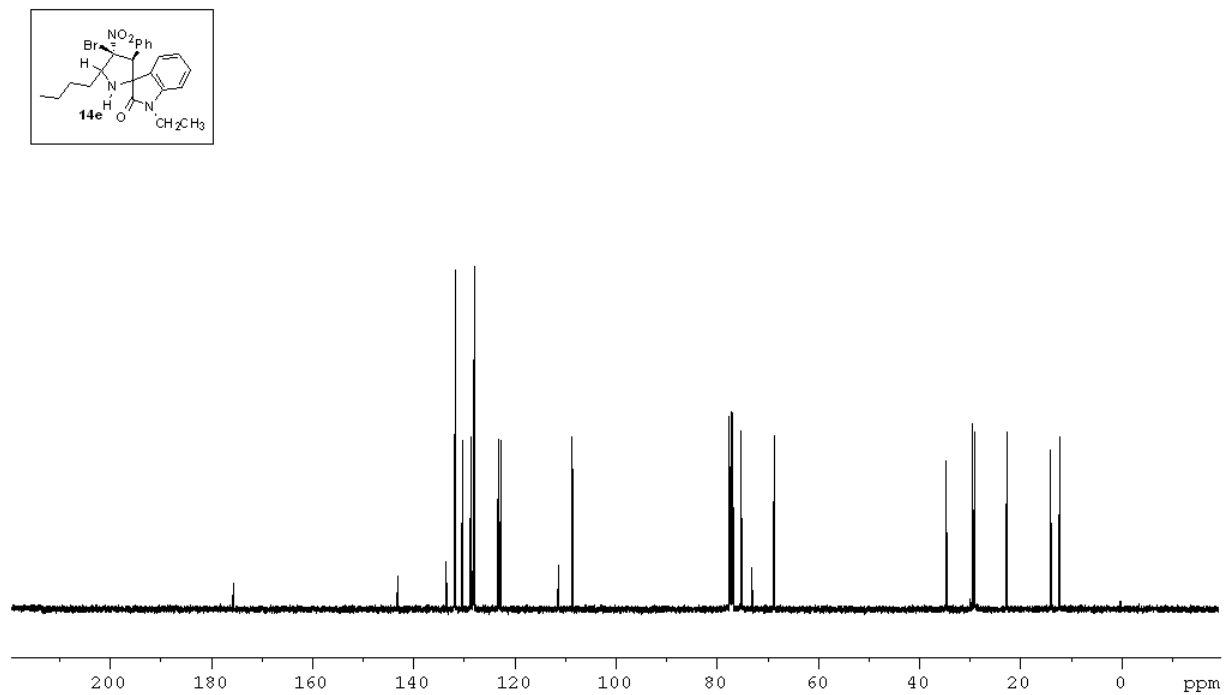

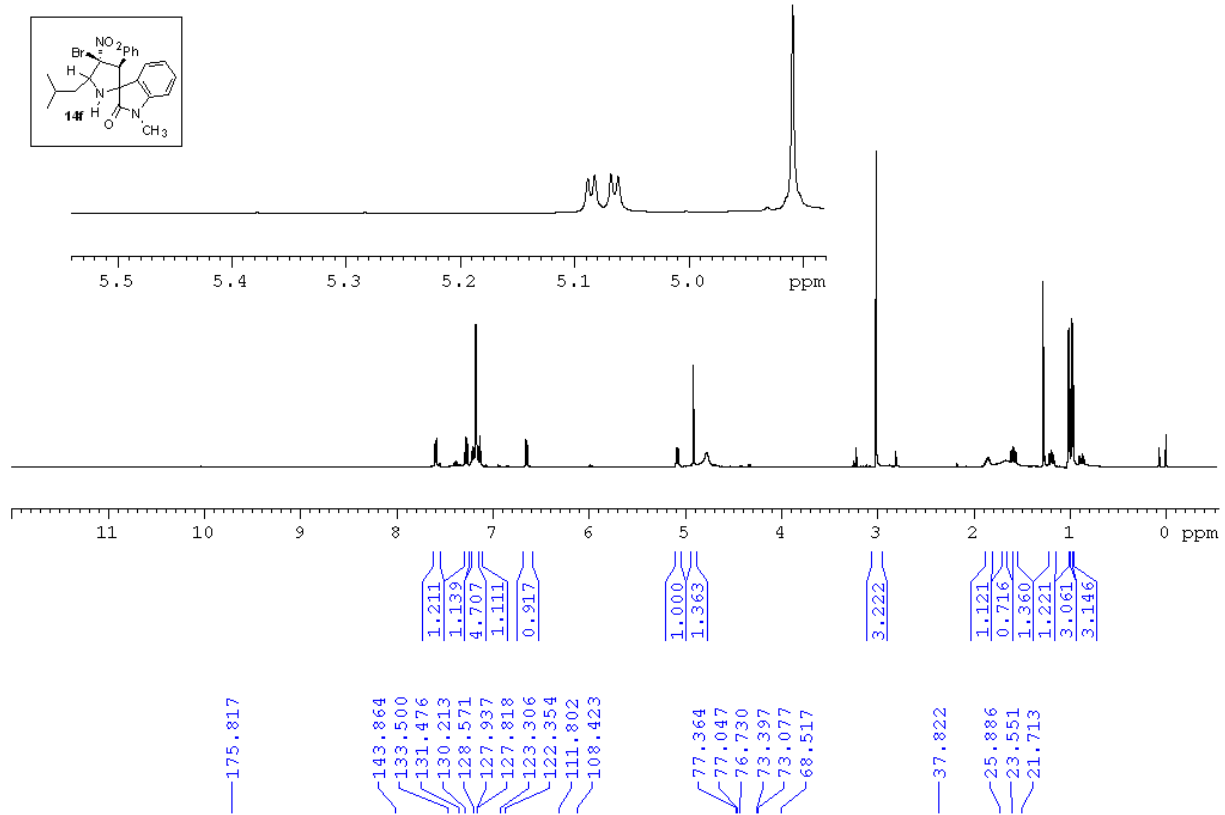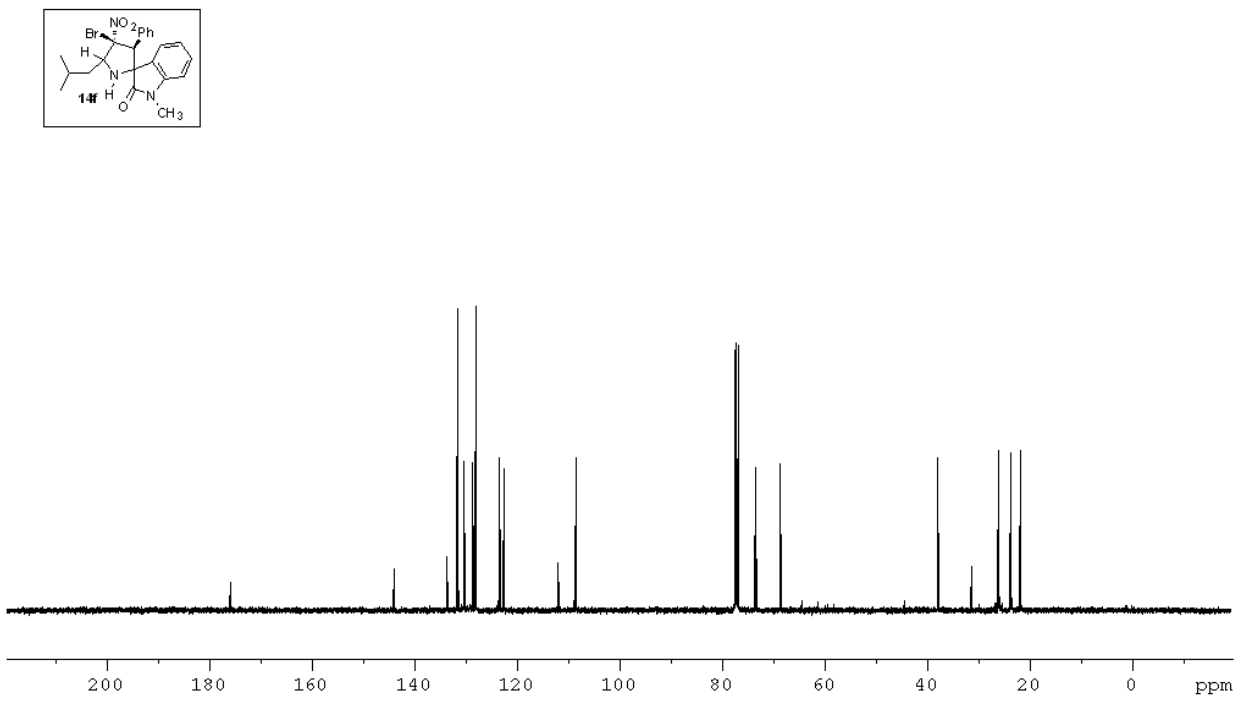



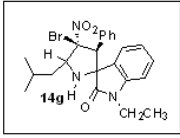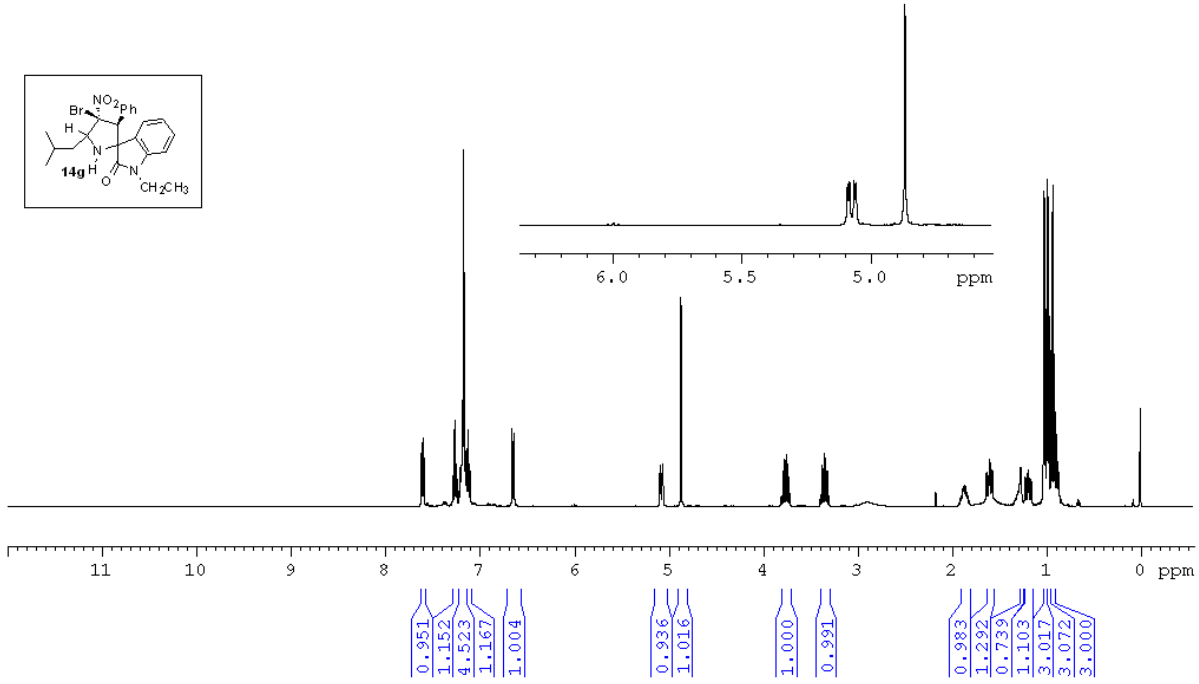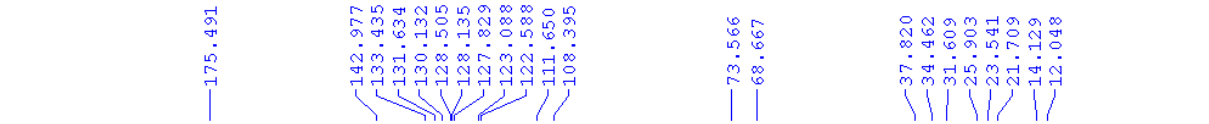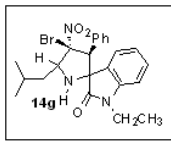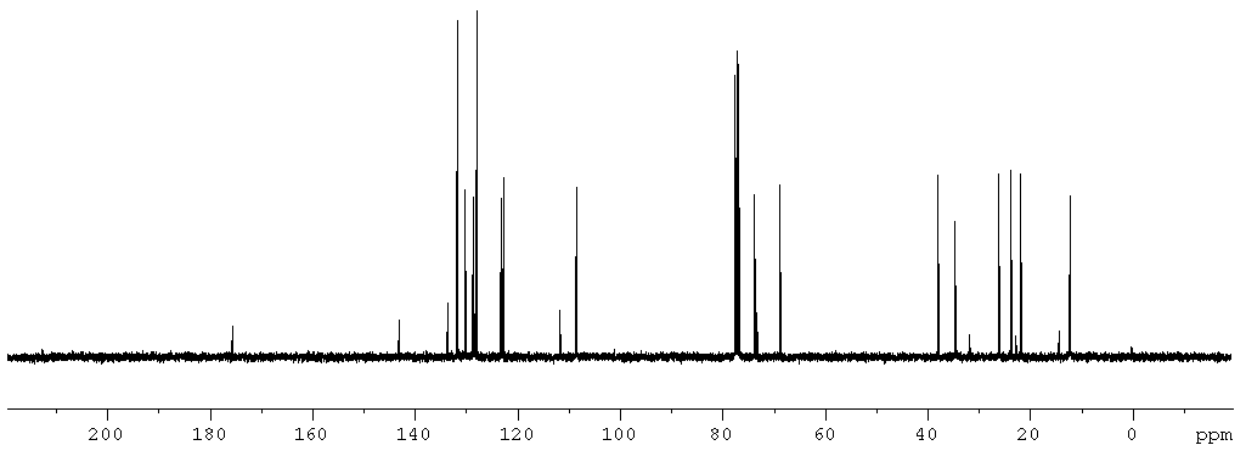

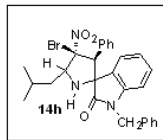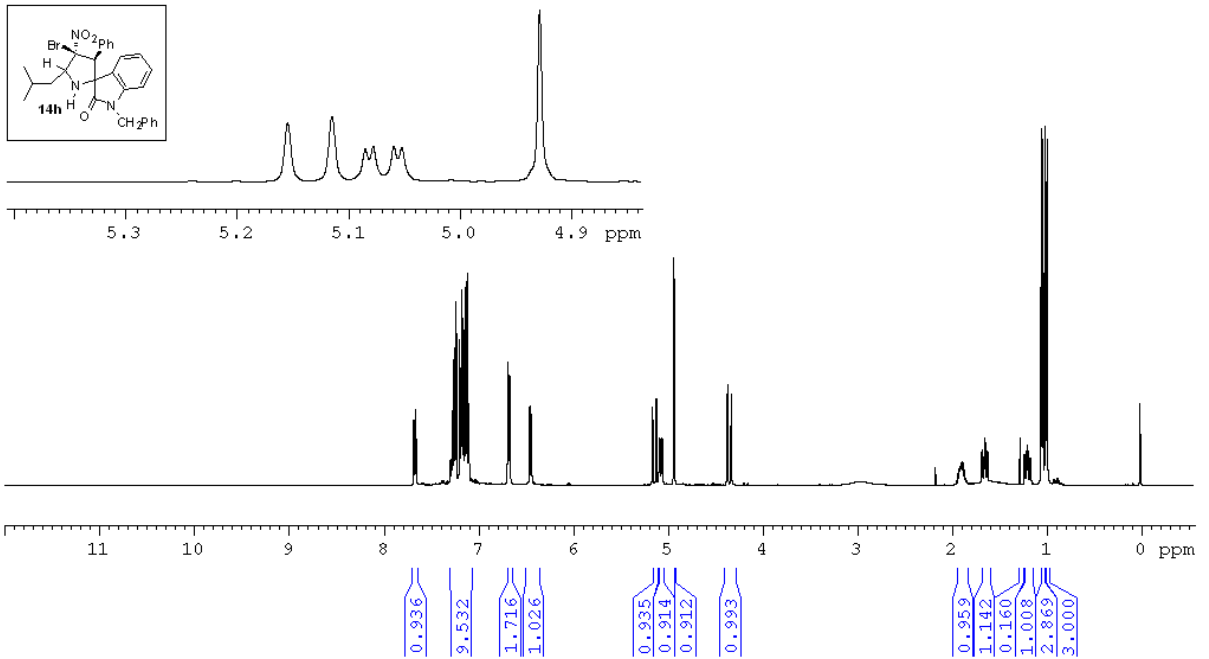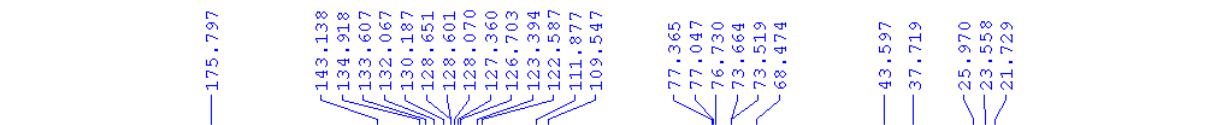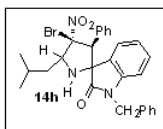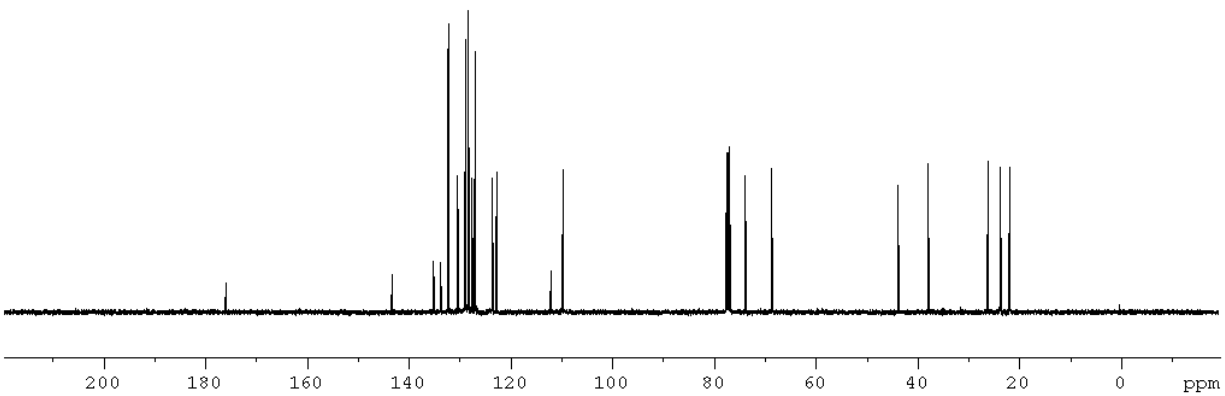

#### IV. Copies of NMR Spectra of 13l-13s

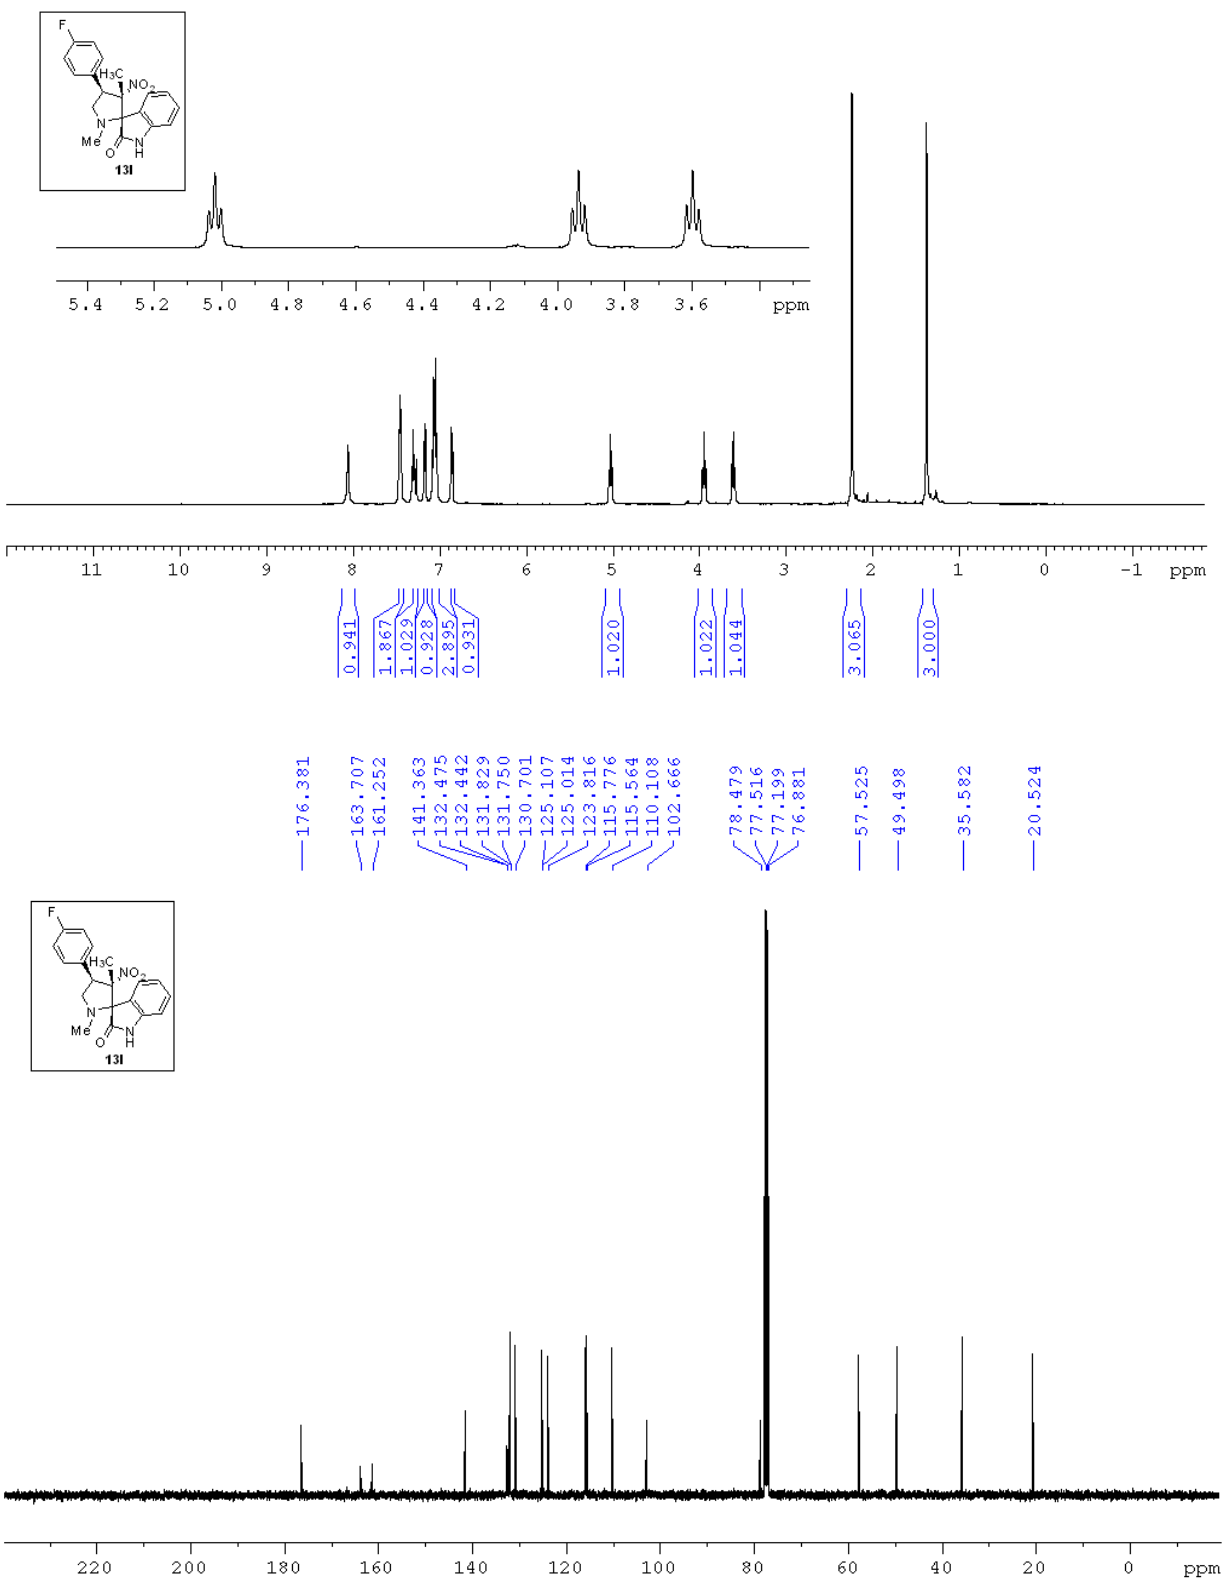

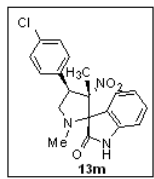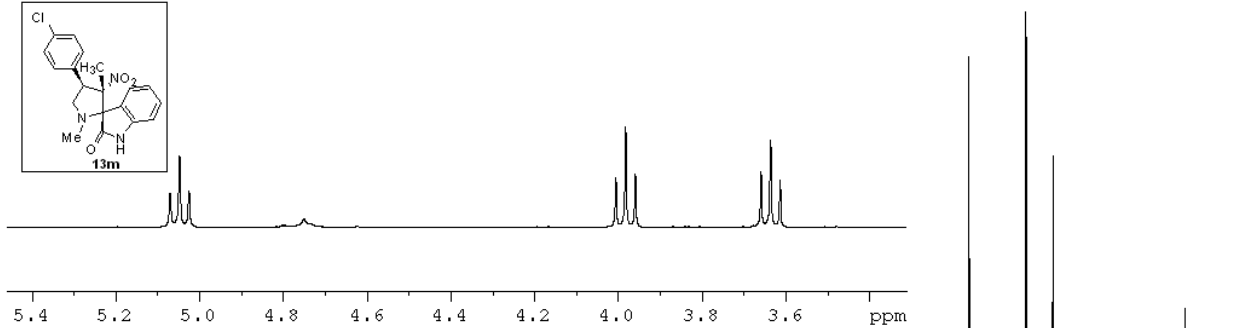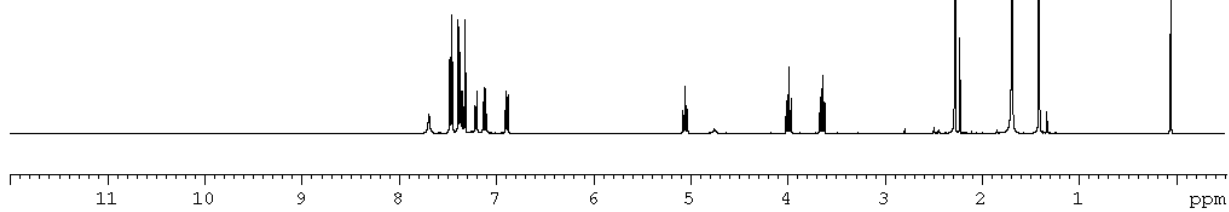

Integration values for the <sup>1</sup>H NMR spectrum:

- 0.714
- 2.035
- 3.218
- 0.971
- 0.994
- 0.867
- 1.053
- 1.105
- 1.085
- 3.000
- 3.009

Chemical shift values (ppm) for the <sup>13</sup>C NMR spectrum:

- 175.876
- 141.154
- 135.112
- 133.742
- 131.383
- 130.545
- 128.802
- 124.933
- 124.861
- 123.660
- 109.853
- 102.505
- 78.262
- 77.346
- 77.234
- 77.028
- 76.711
- 57.169
- 49.484
- 35.377
- 20.357

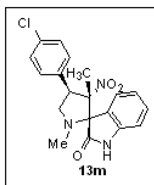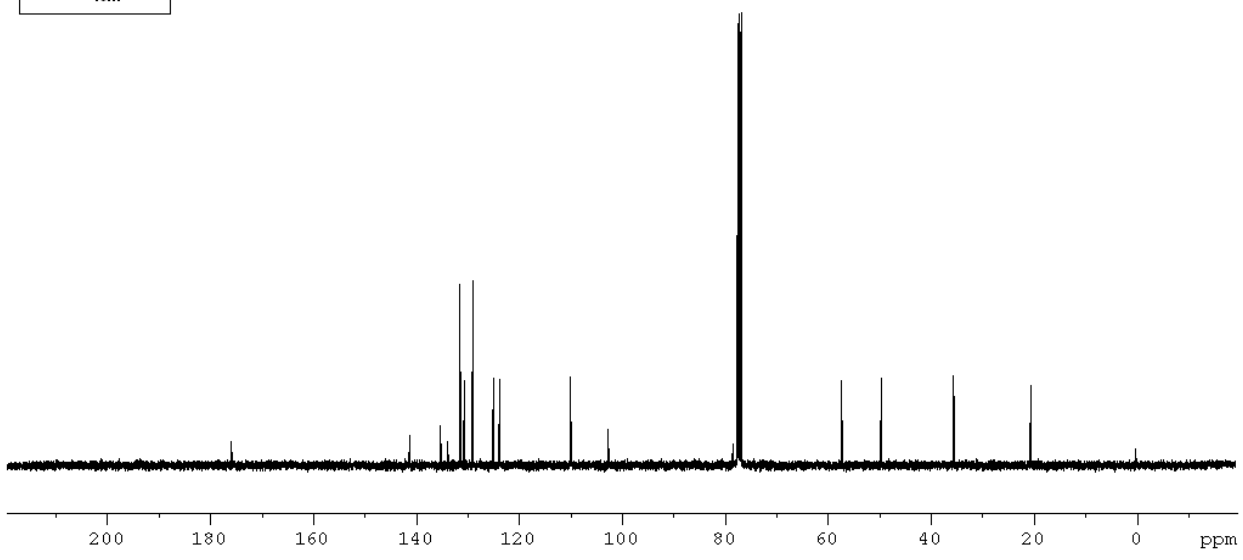

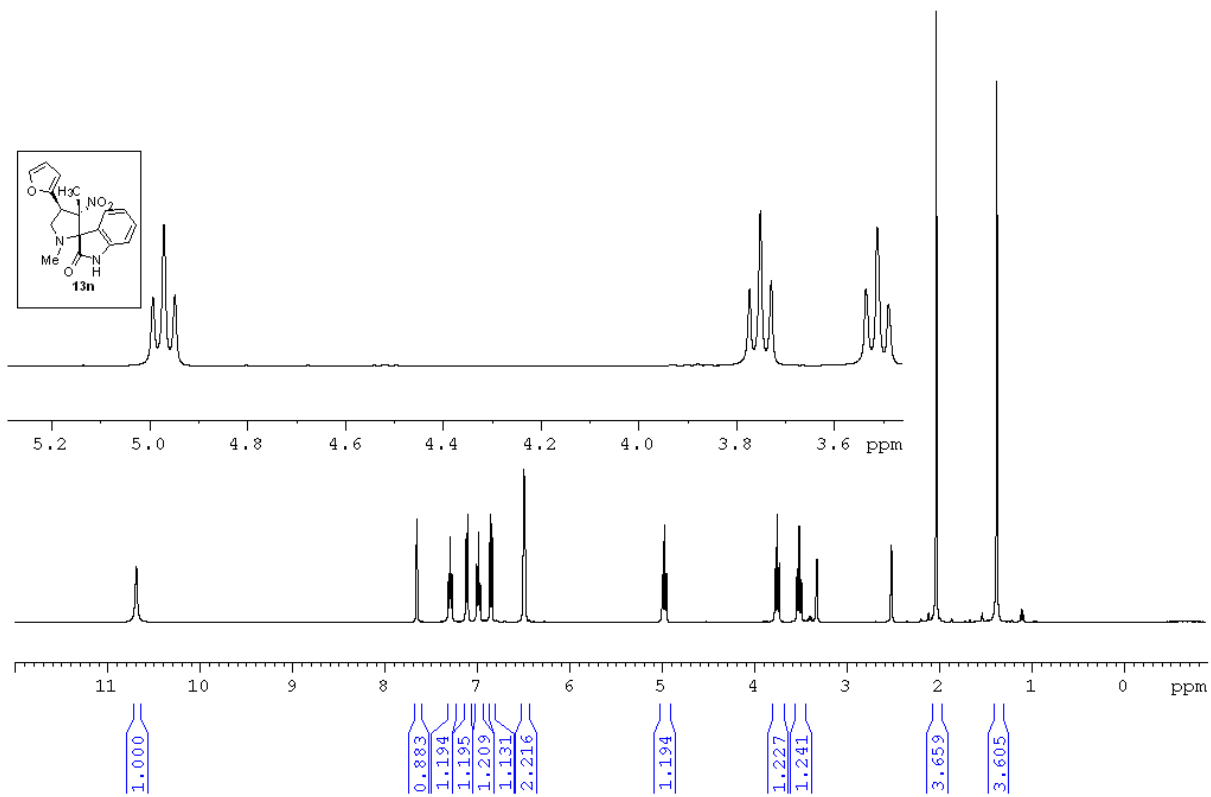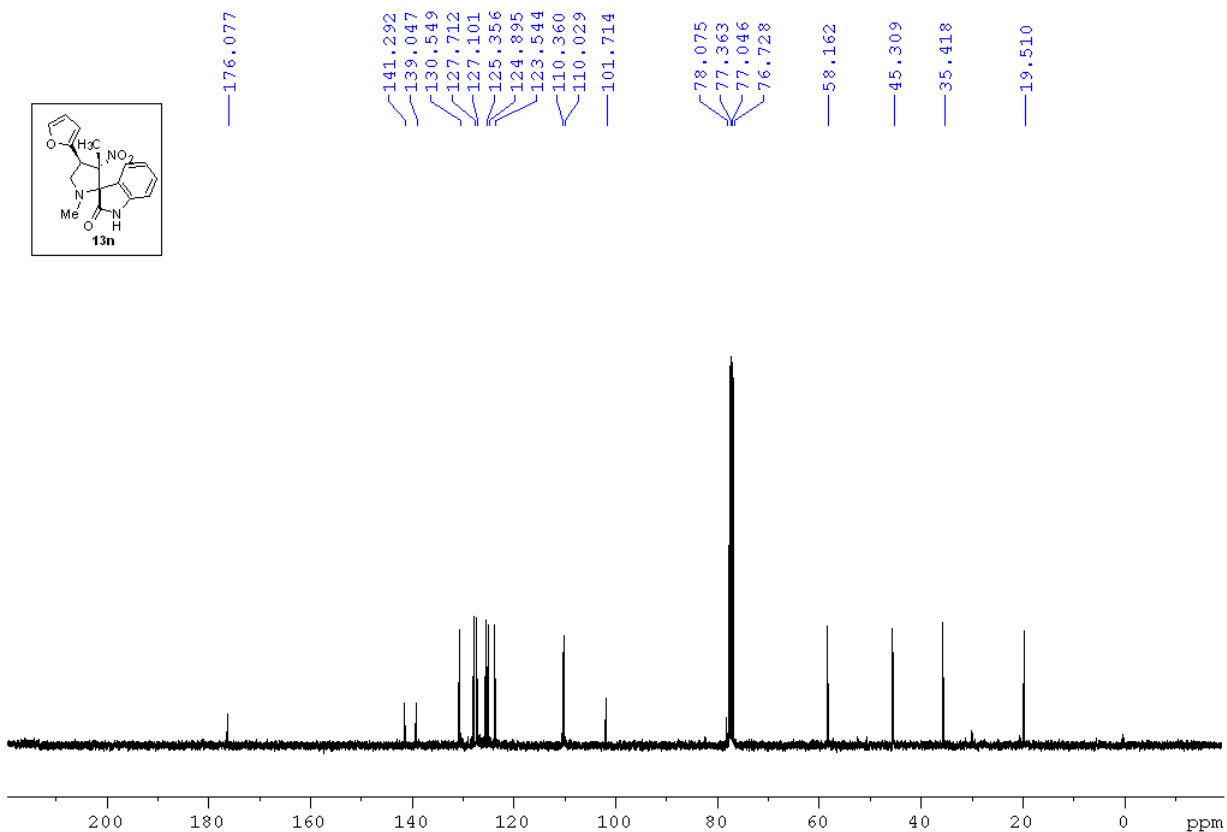

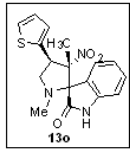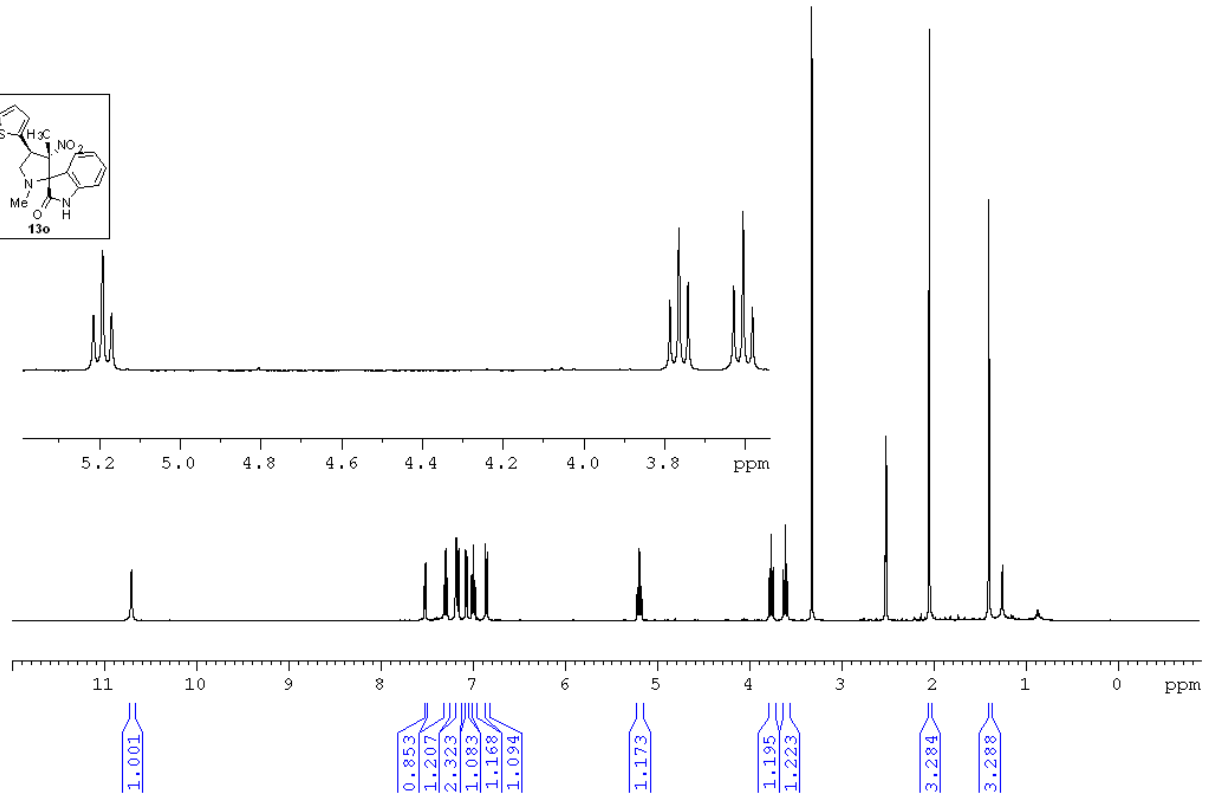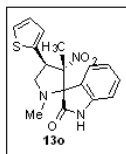

- <sup>13</sup>C NMR Spectrum (ppm):**
- 176.077
  - 141.292
  - 139.047
  - 130.549
  - 127.712
  - 127.101
  - 125.356
  - 124.895
  - 123.544
  - 110.360
  - 110.029
  - 101.714
  - 78.075
  - 77.363
  - 77.046
  - 76.728
  - 58.162
  - 45.309
  - 35.418
  - 19.510

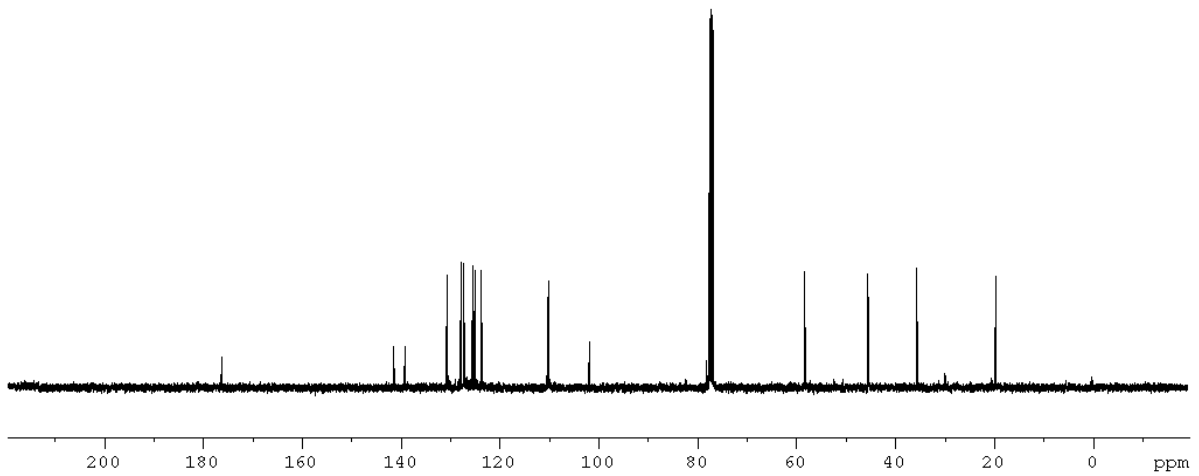

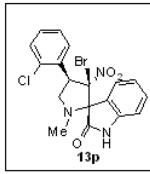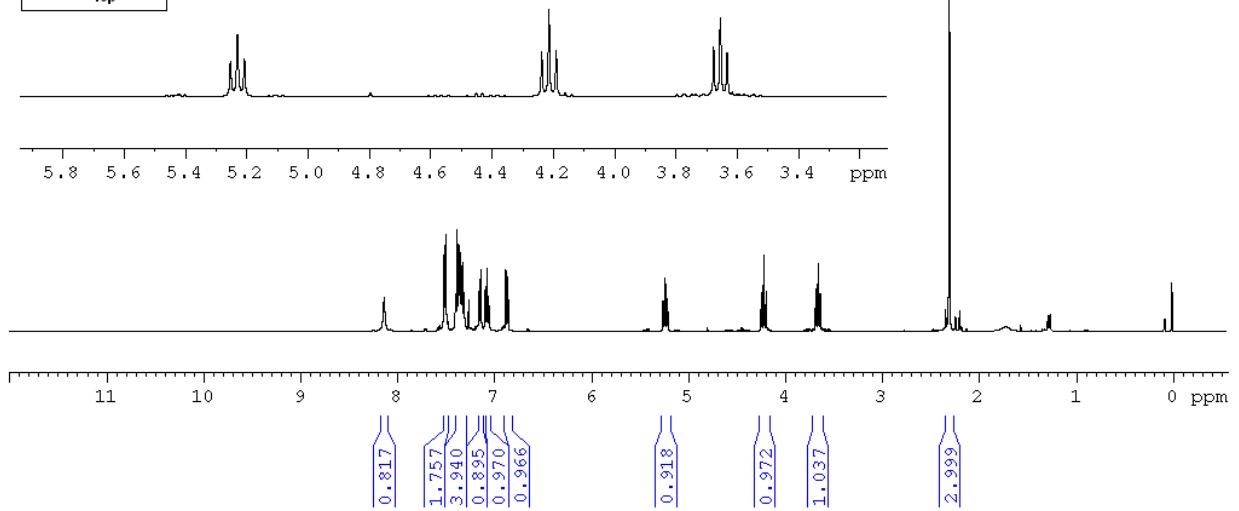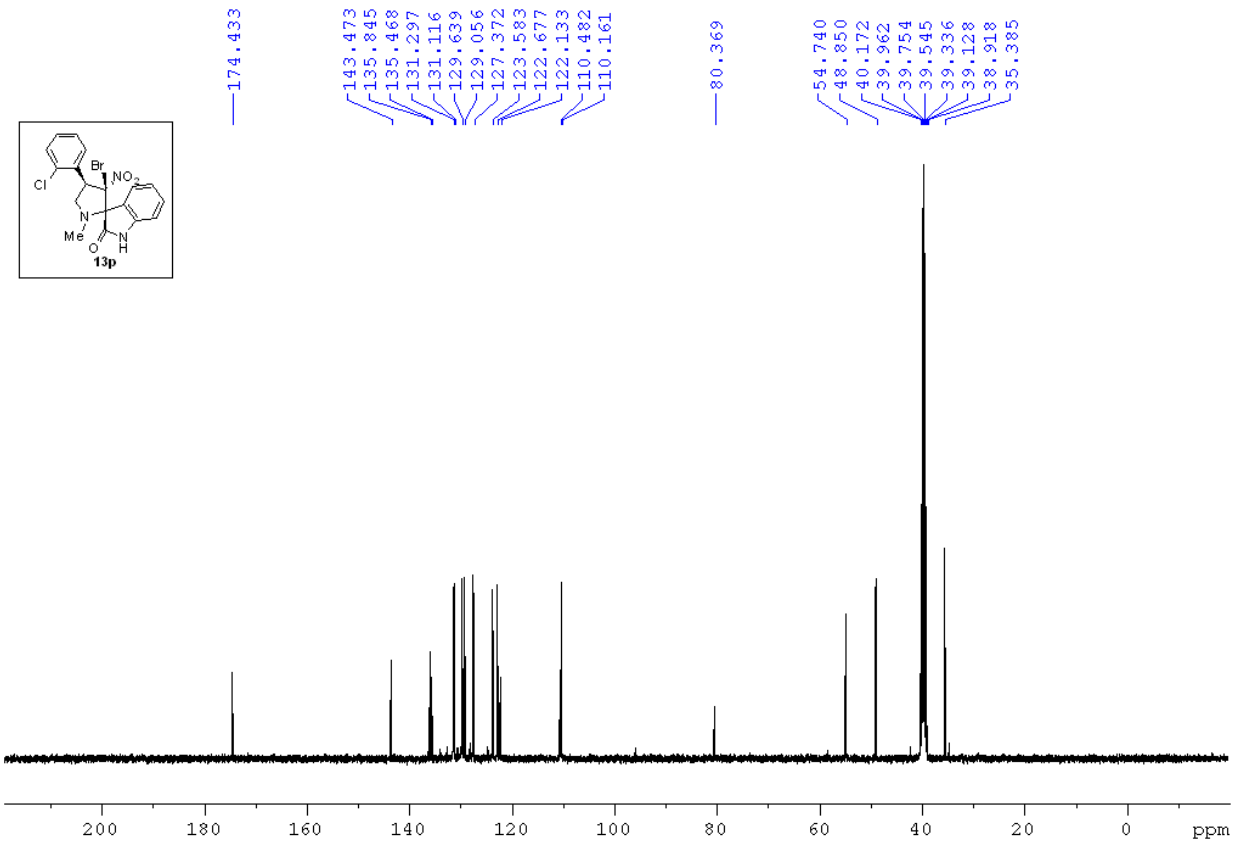

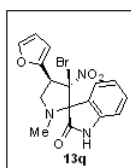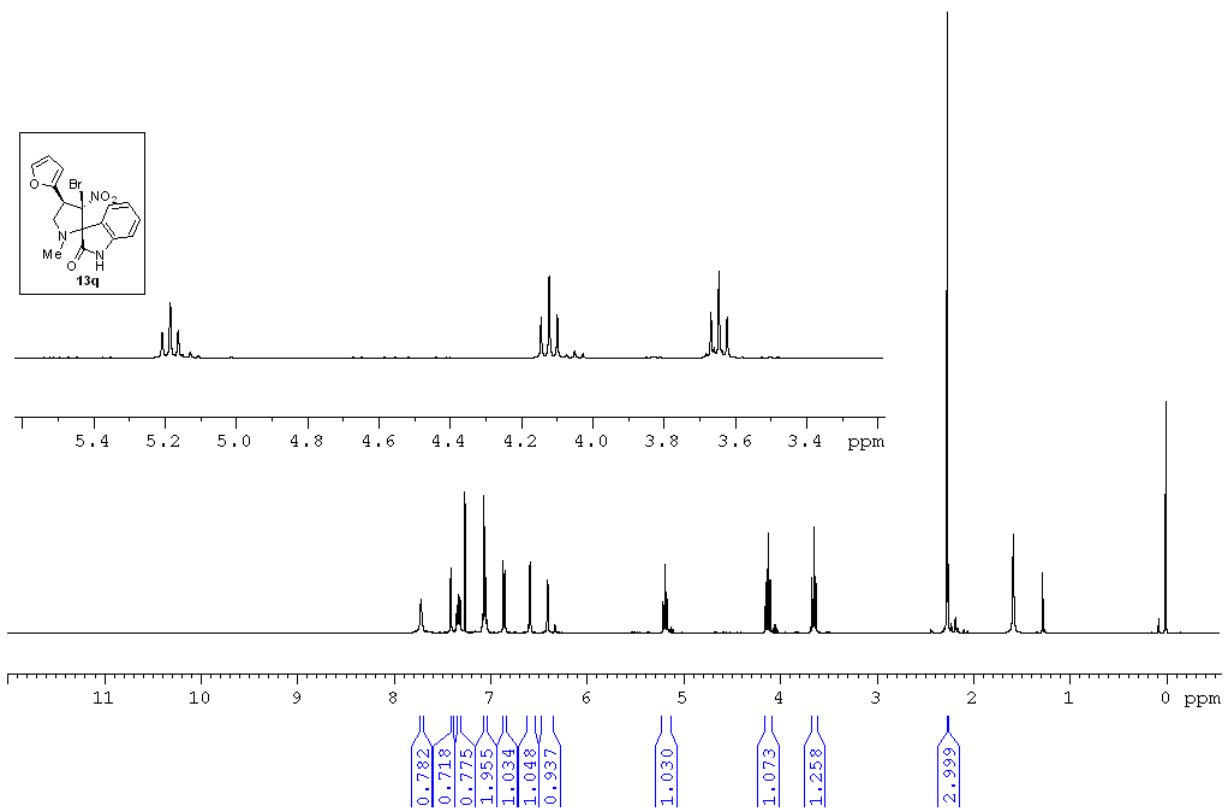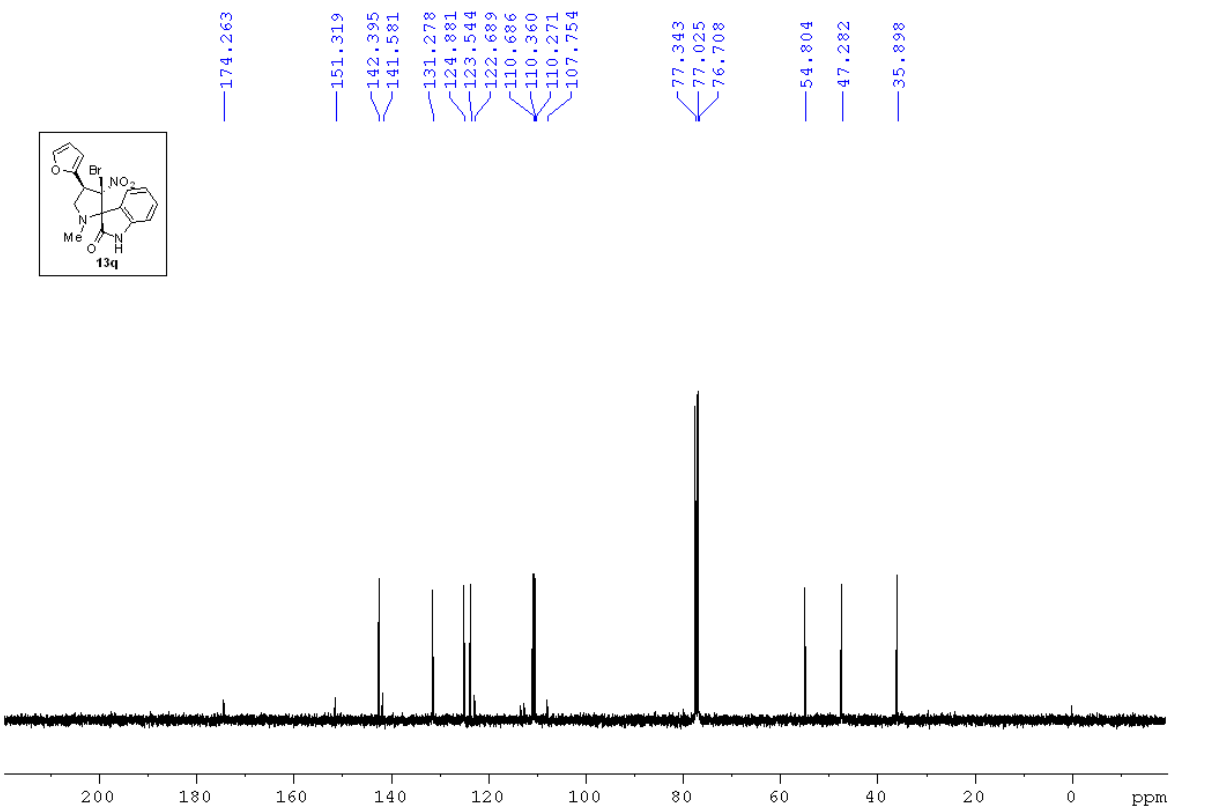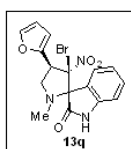



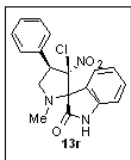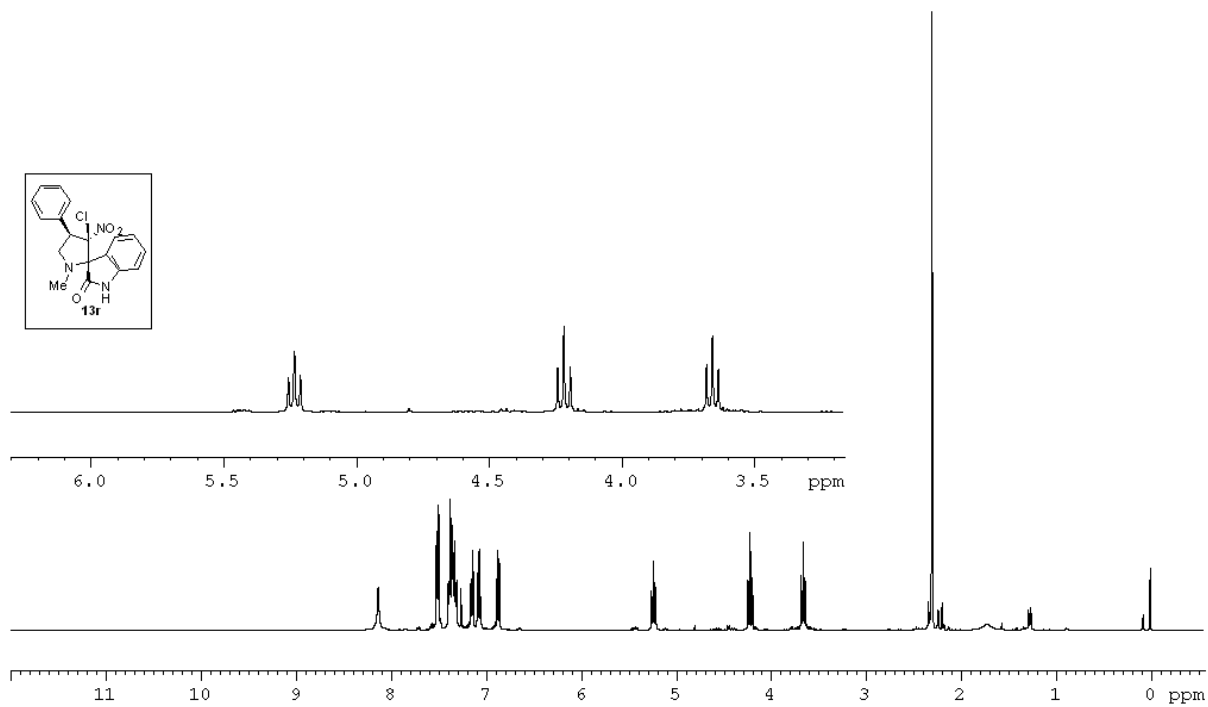

0.817  
1.757  
3.940  
0.895  
0.970  
0.966  
0.918  
0.972  
1.037  
2.999

174.659  
141.779  
135.452  
131.252  
130.863  
128.457  
128.347  
124.785  
123.729  
123.292  
115.953  
110.296  
80.481  
77.369  
77.052  
76.734  
57.165  
53.128  
35.688

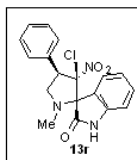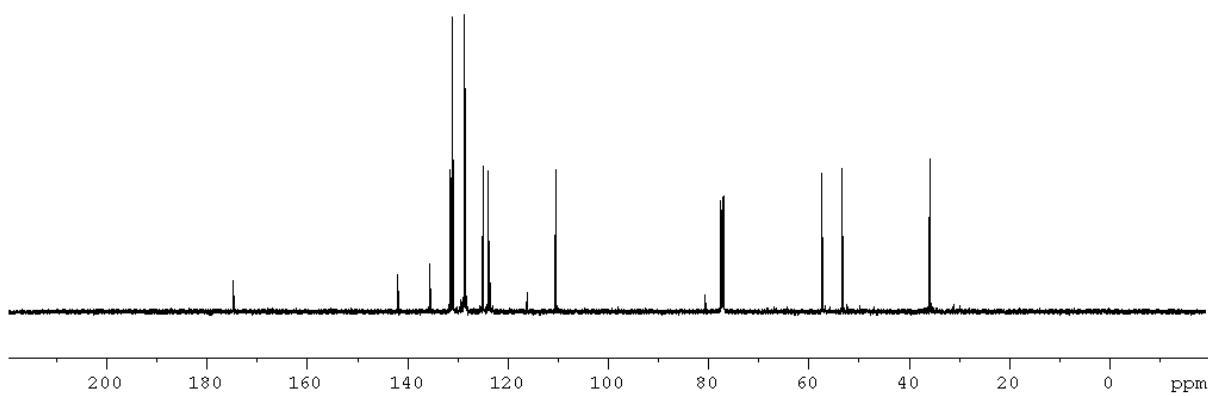

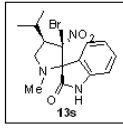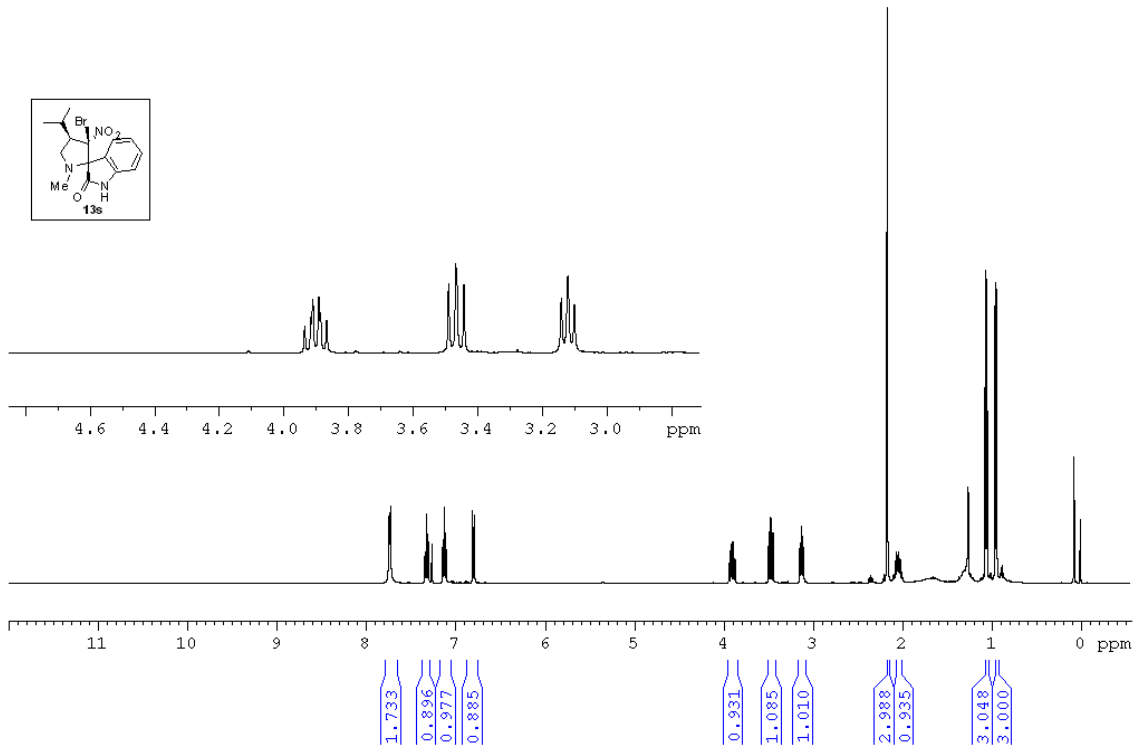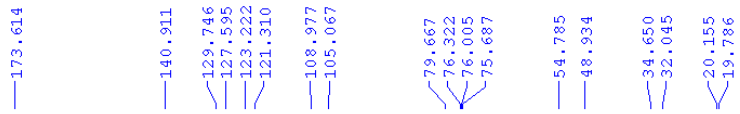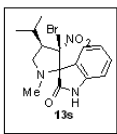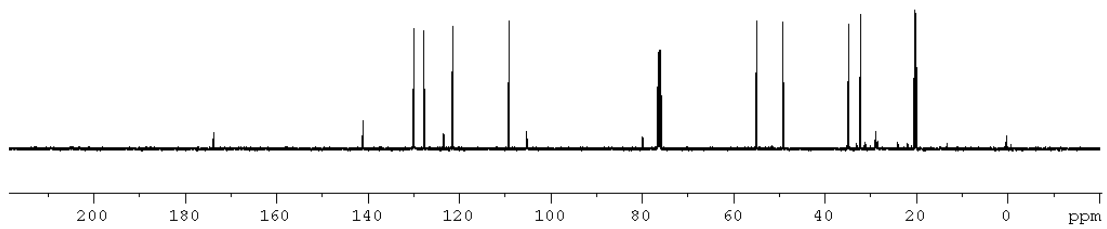

## V. Copies of NMR Spectra of 15 & 16

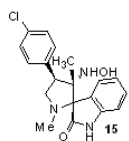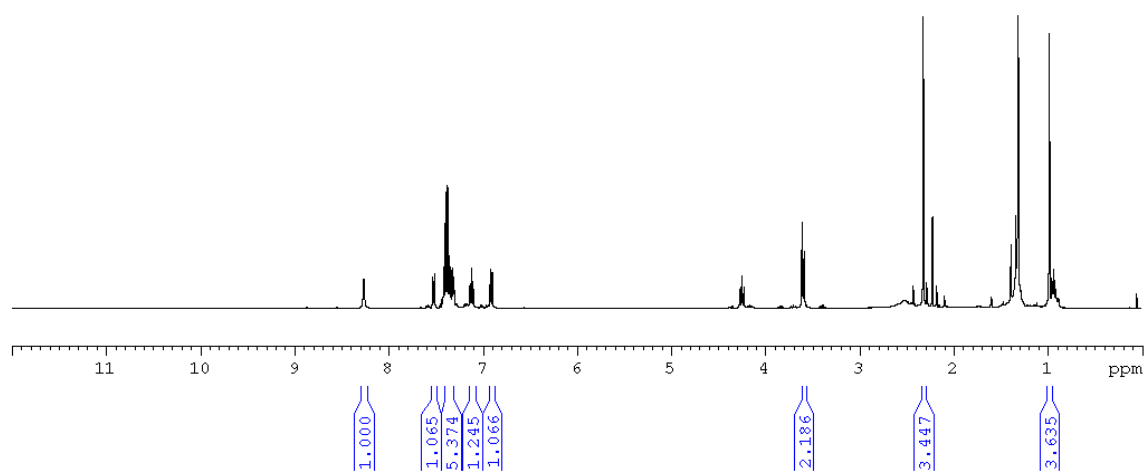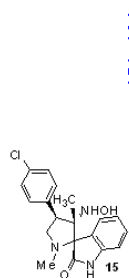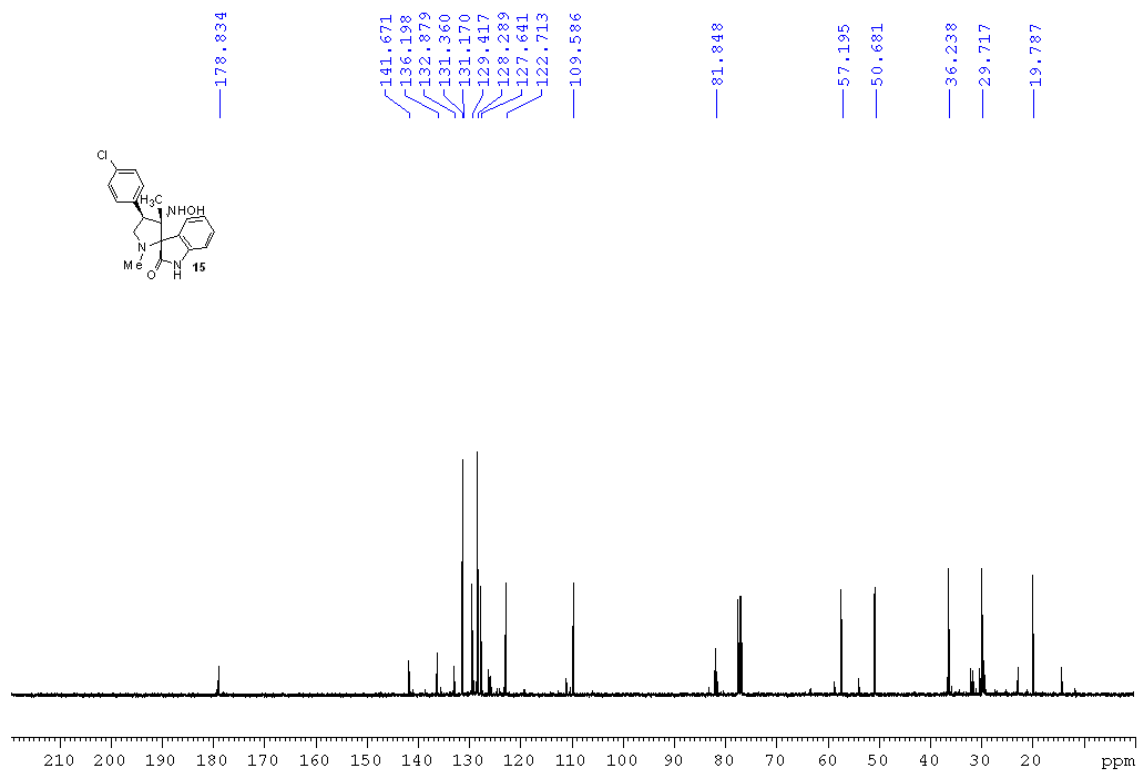

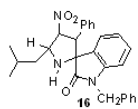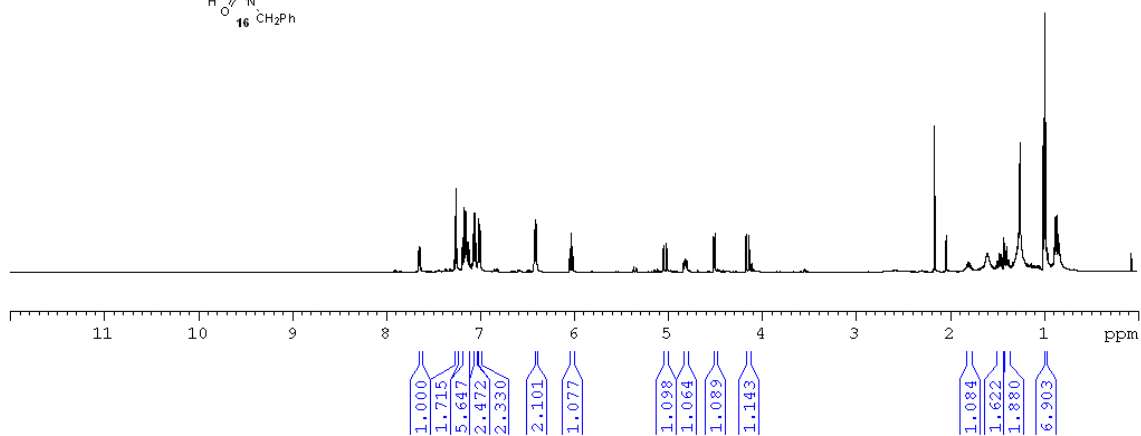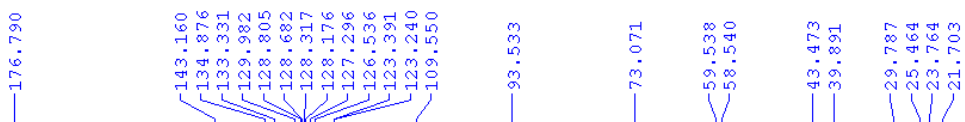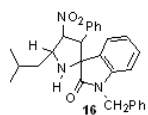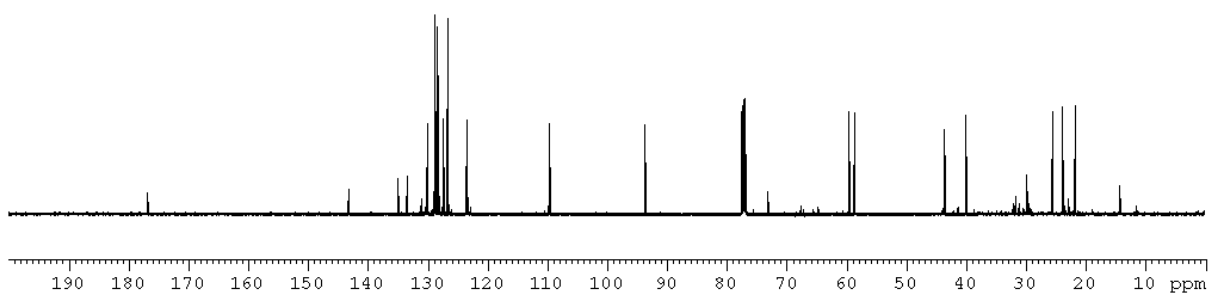

## VI. Copies of 2D-NMR spectra of 13l

### a) COSY for the compound 13l

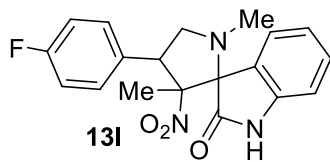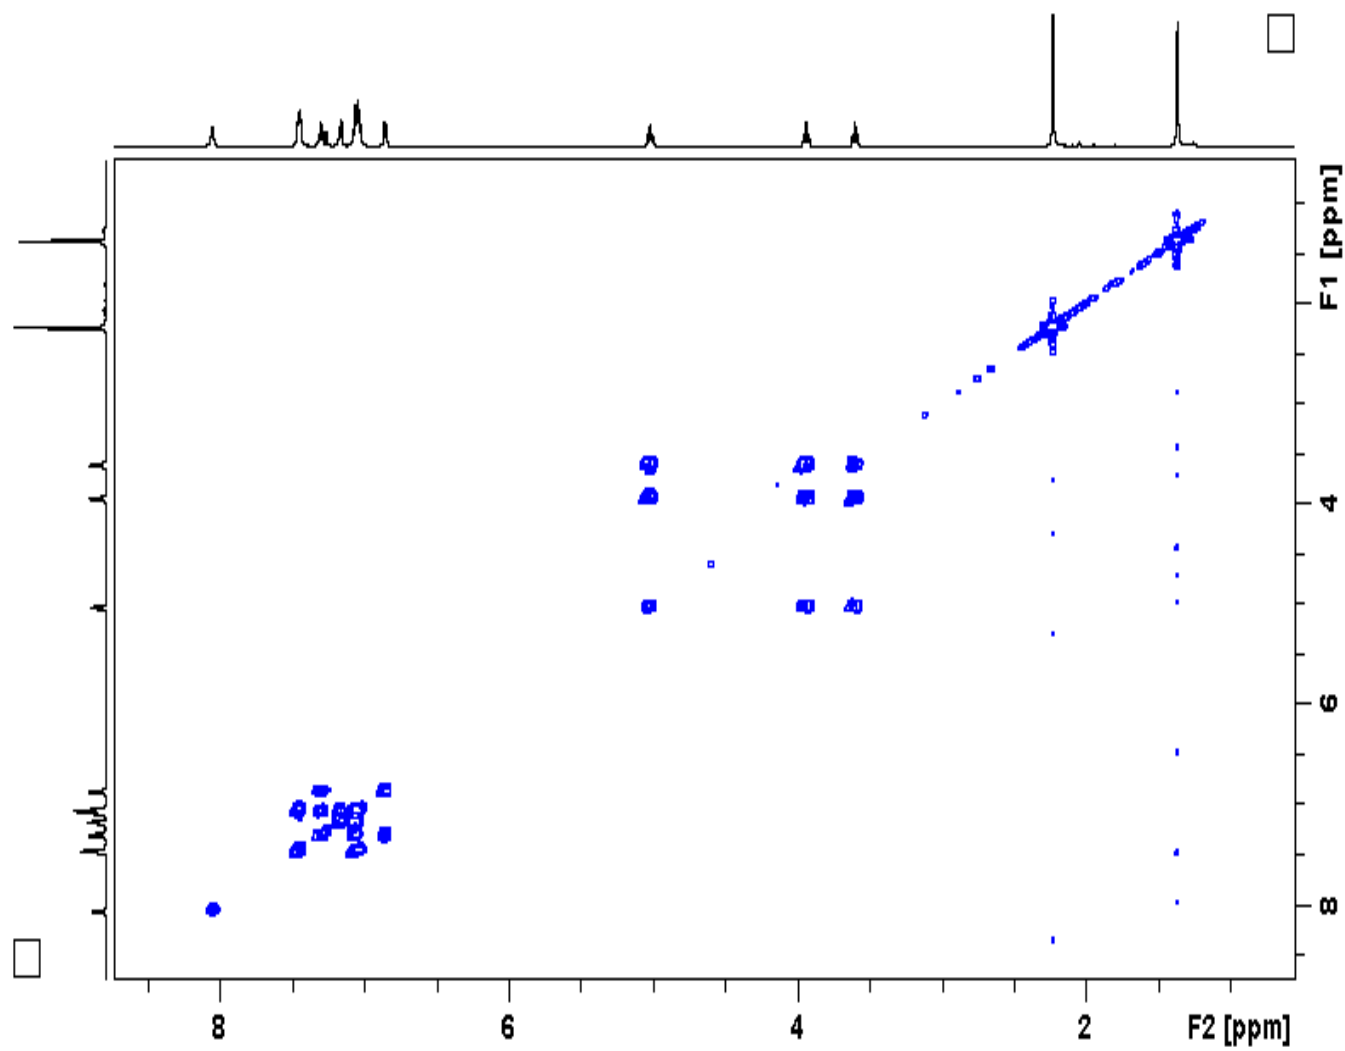

b) NOESY for the compound 13l

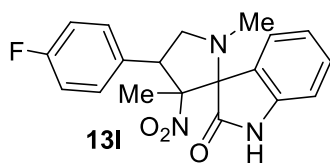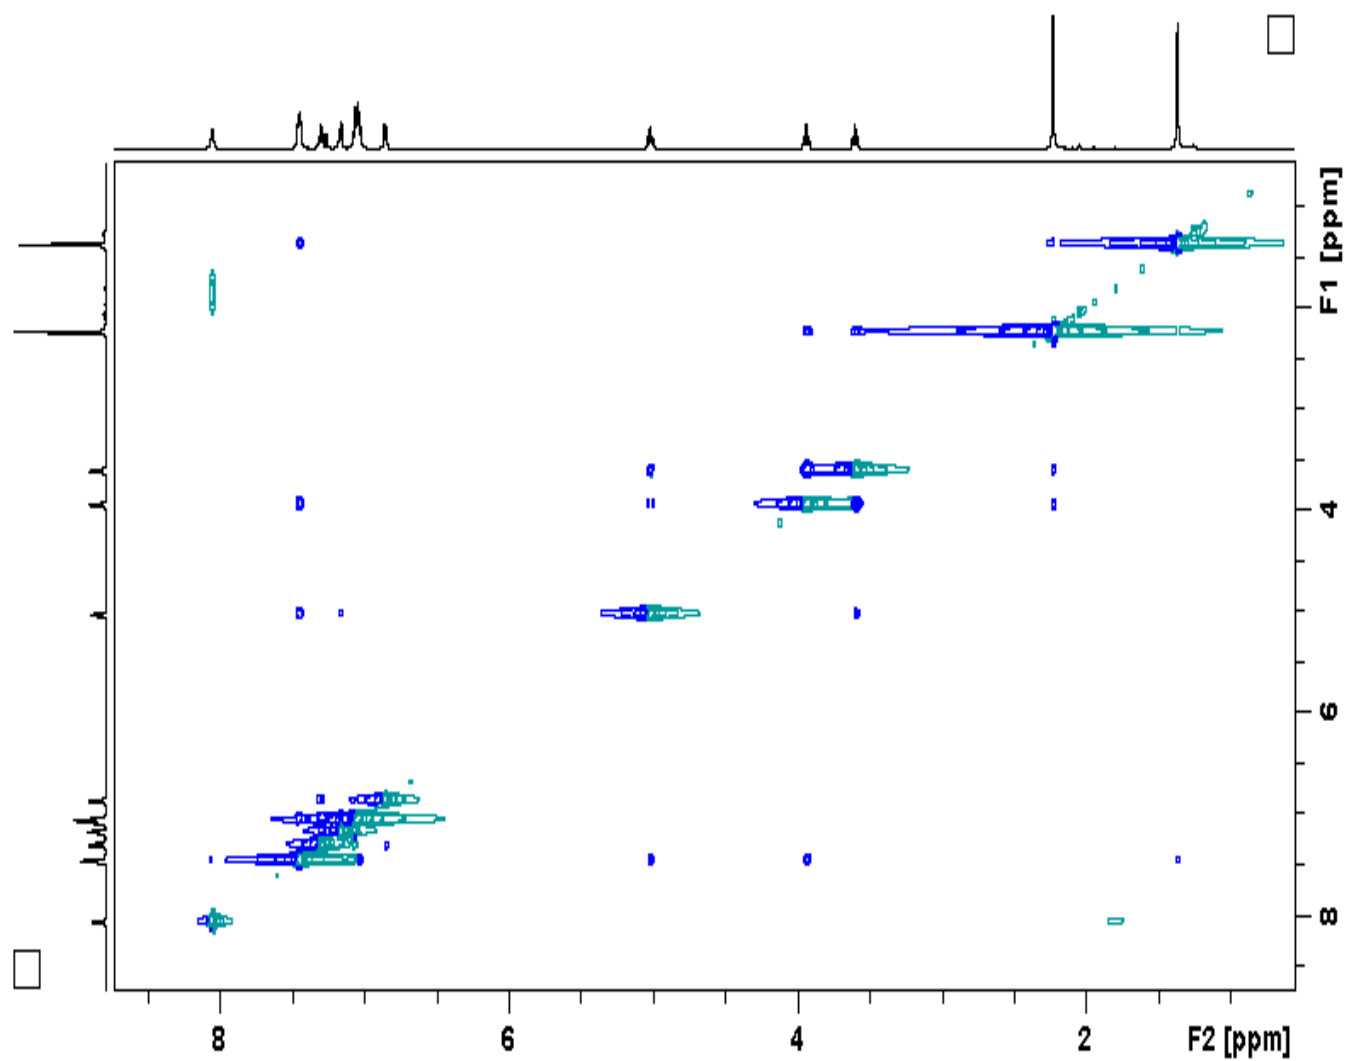

c) HSQC for the compound 13l

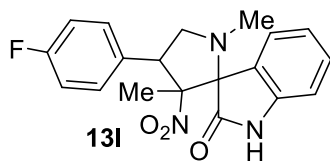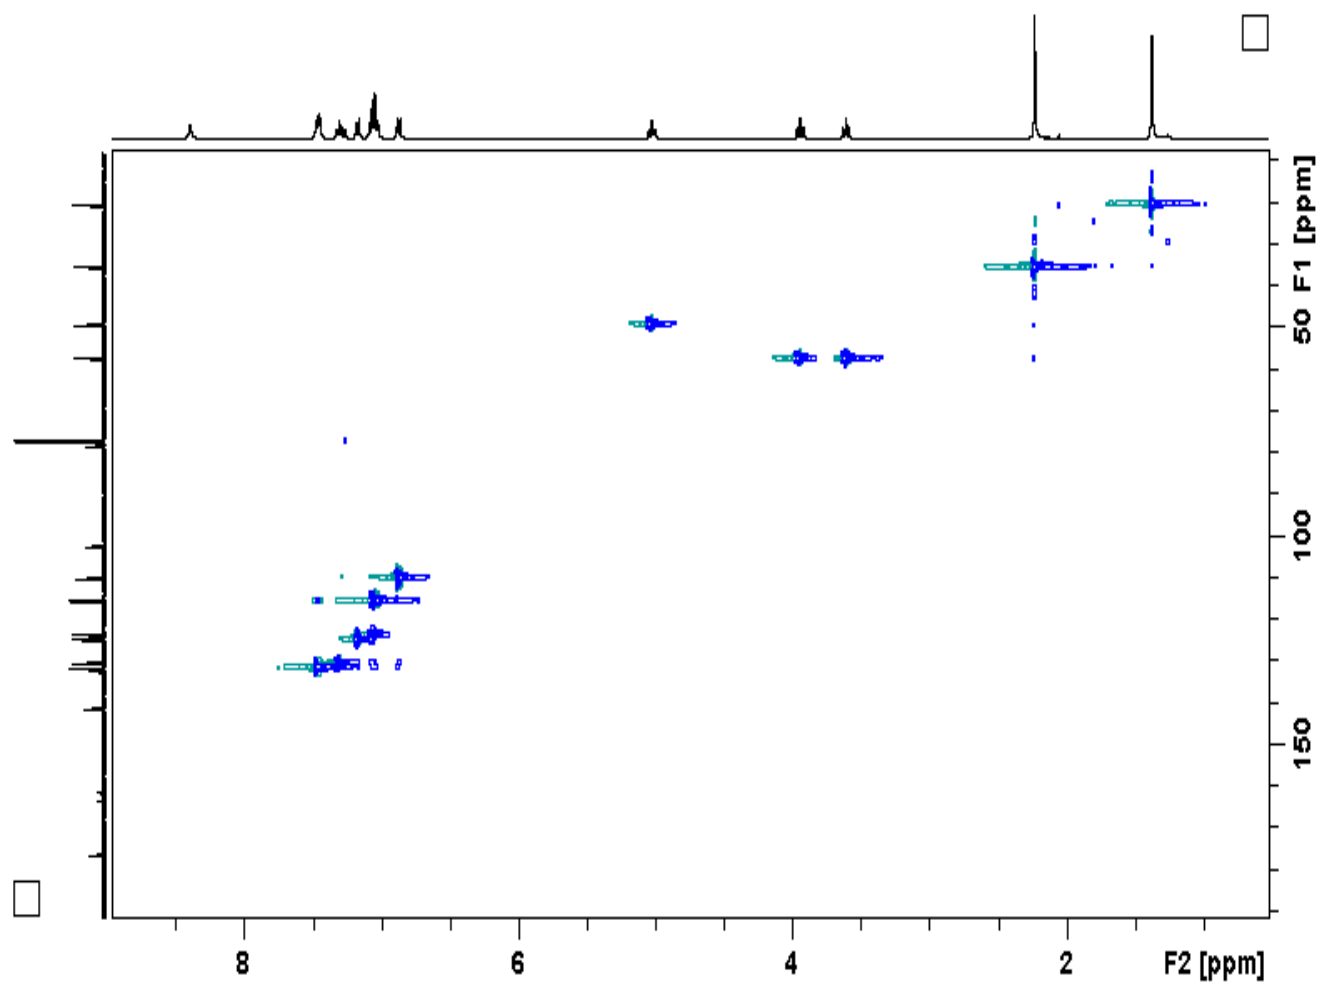

## VII. Copies of HPLC chromatograms for starting materials

### Synthesis of Starting materials

All the starting materials (**6b-6j** & **12a-12i**) were synthesized according to the procedure in the literature.<sup>1-5</sup> The purity of the compounds were confirmed by reverse-phase HPLC screening Agilent 1220 Infinity II LC instrument.

| Sl.No. | Sample code & Structure                                                                          | IUPAC Name                           | % Purity by HPLC | Reference |
|--------|--------------------------------------------------------------------------------------------------|--------------------------------------|------------------|-----------|
| 1      | 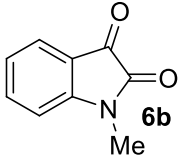<br><b>6b</b>   | 1-methylindoline-2,3-dione           | 96.88            | 1         |
| 2      | <br><b>6c</b>   | 1-ethylindoline-2,3-dione            | 99.21            | 1         |
| 3      | <br><b>6d</b>  | 1-benzylindoline-2,3-dione           | 94.83            | 1         |
| 4      | <br><b>6e</b> | 1-(3-chlorobenzyl)indoline-2,3-dione | 98.08            | 1         |
| 5      | <br><b>6f</b> | 5-fluoroindoline-2,3-dione           | 99.83            | 2         |
| 6      | <br><b>6g</b> | 5-chloroindoline-2,3-dione           | 95.50            | 2         |
| 7      | <br><b>6h</b> | 5-bromoindoline-2,3-dione            | 96.76            | 2         |



|    |                                                                                     |                                              |       |   |
|----|-------------------------------------------------------------------------------------|----------------------------------------------|-------|---|
| 8  | 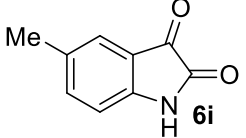   | 5-methylindoline-2,3-dione                   | 96.68 | 2 |
| 9  |    | 7-chloroindoline-2,3-dione                   | 91.59 | 2 |
| 10 |    | (Z)-2-(2-bromo-2-nitrovinyl)benzene          | 96.59 | 5 |
| 11 |    | (E)-1-fluoro-4-(2-nitroprop-1-enyl)benzene   | 99.81 | 3 |
| 12 |    | (E)-1-chloro-4-(2-nitroprop-1-enyl)benzene   | 97.65 | 3 |
| 13 |   | (E)-2-(2-nitroprop-1-enyl)furan              | 99.86 | 3 |
| 14 |  | (E)-2-(2-nitroprop-1-enyl)thiophene          | 91.72 | 3 |
| 15 |  | (Z)-1-(2-bromo-2-nitrovinyl)-2-chlorobenzene | 92.56 | 5 |
| 16 |  | (Z)-2-(2-bromo-2-nitrovinyl)furan            | 91.30 | 5 |
| 17 |  | (Z)-2-(2-chloro-2-nitrovinyl)benzene         | 92.56 | 4 |
| 18 |  | (Z)-1-bromo-3-methyl-1-nitrobut-1-ene        | 91.85 | 5 |

RP-HPLC analysis were carried out on Agilent HPLC (autosampler) on C-18 column using MeOH- H<sub>2</sub>O binary solvent (90:10)

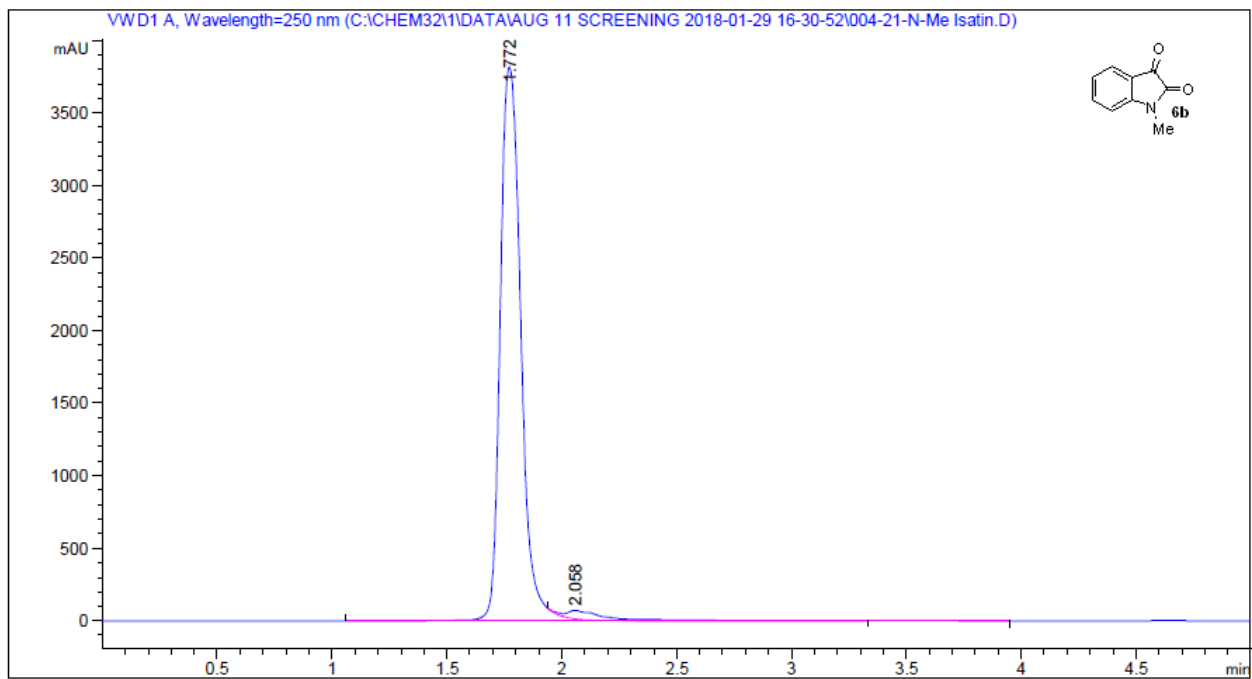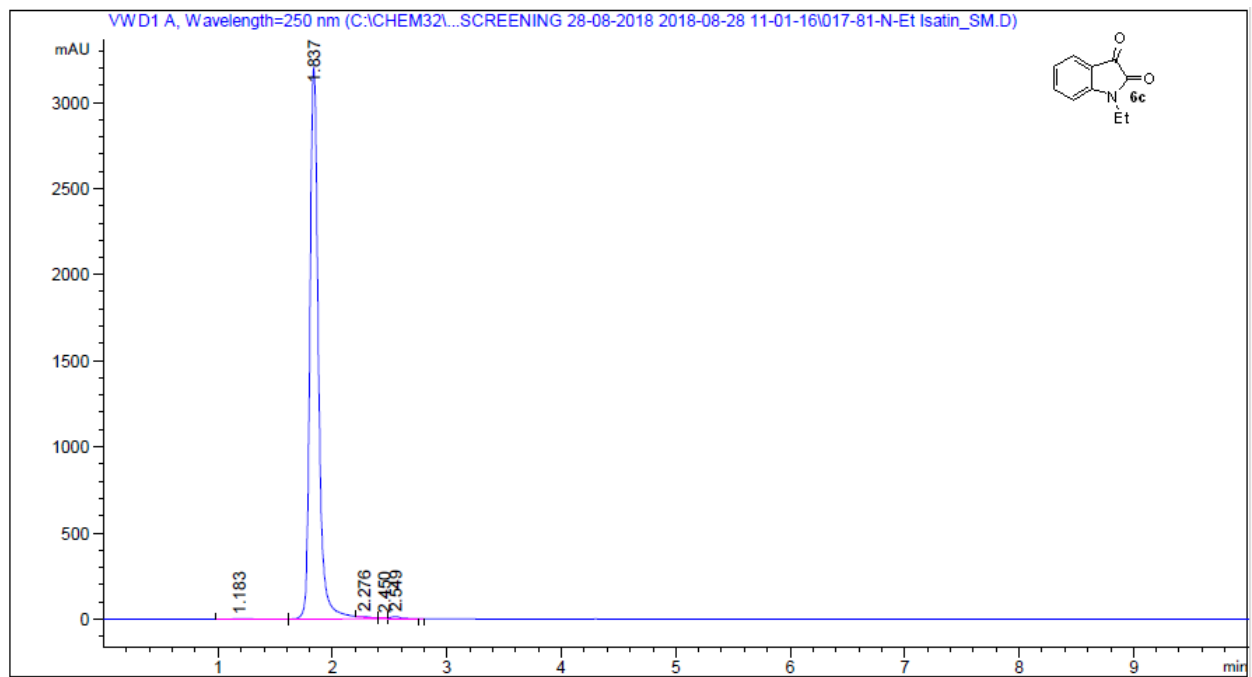

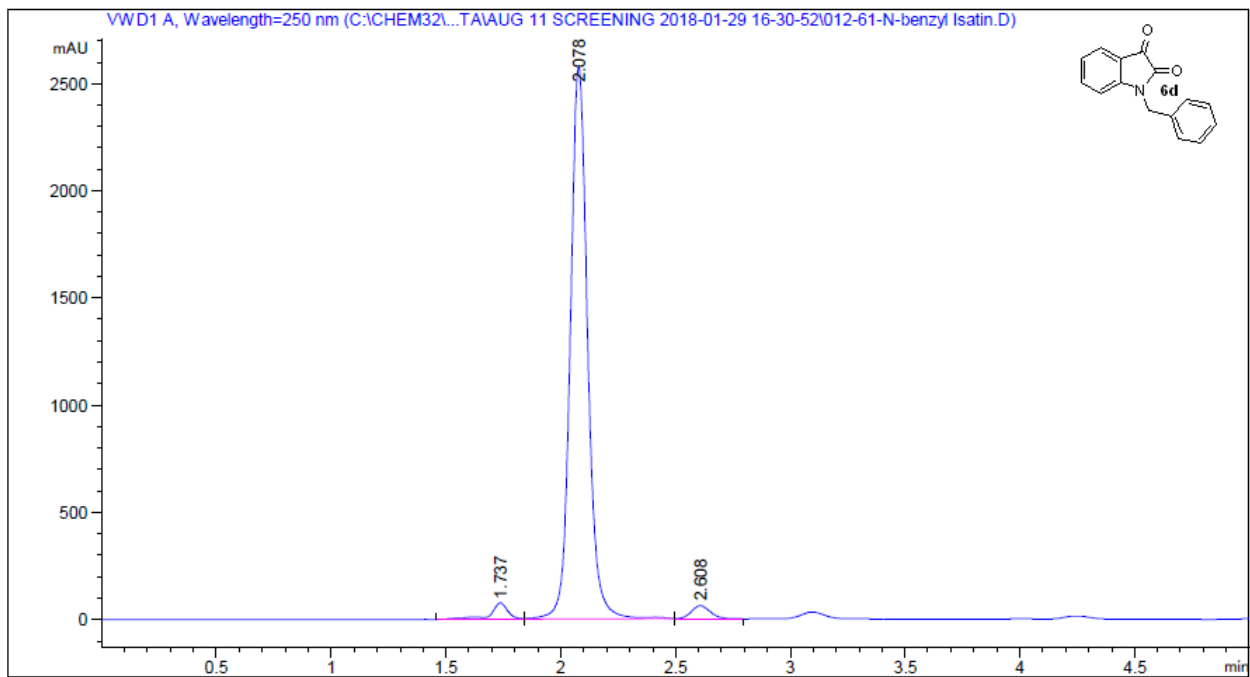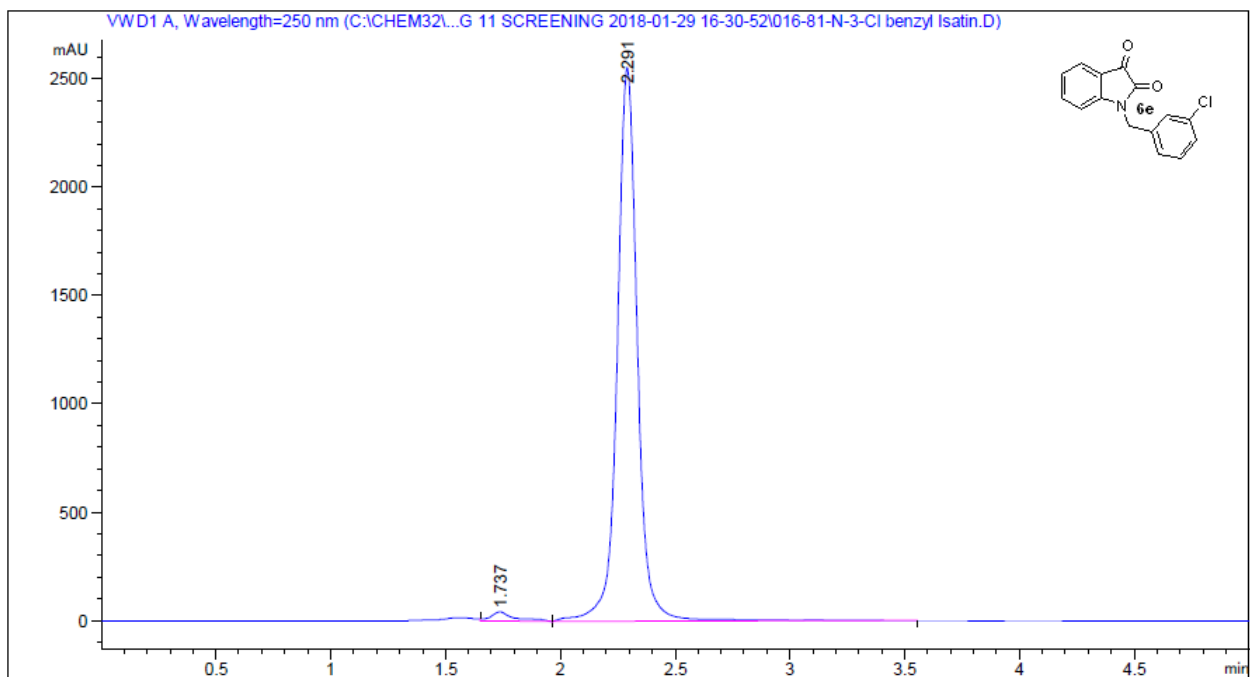

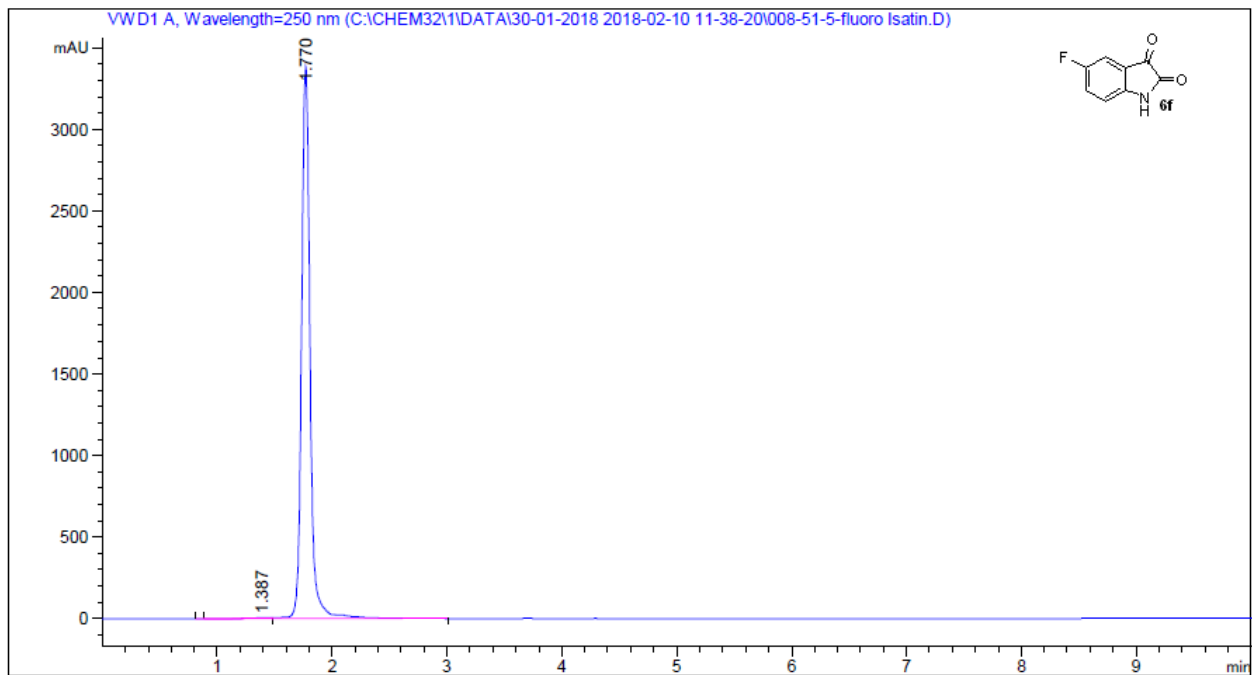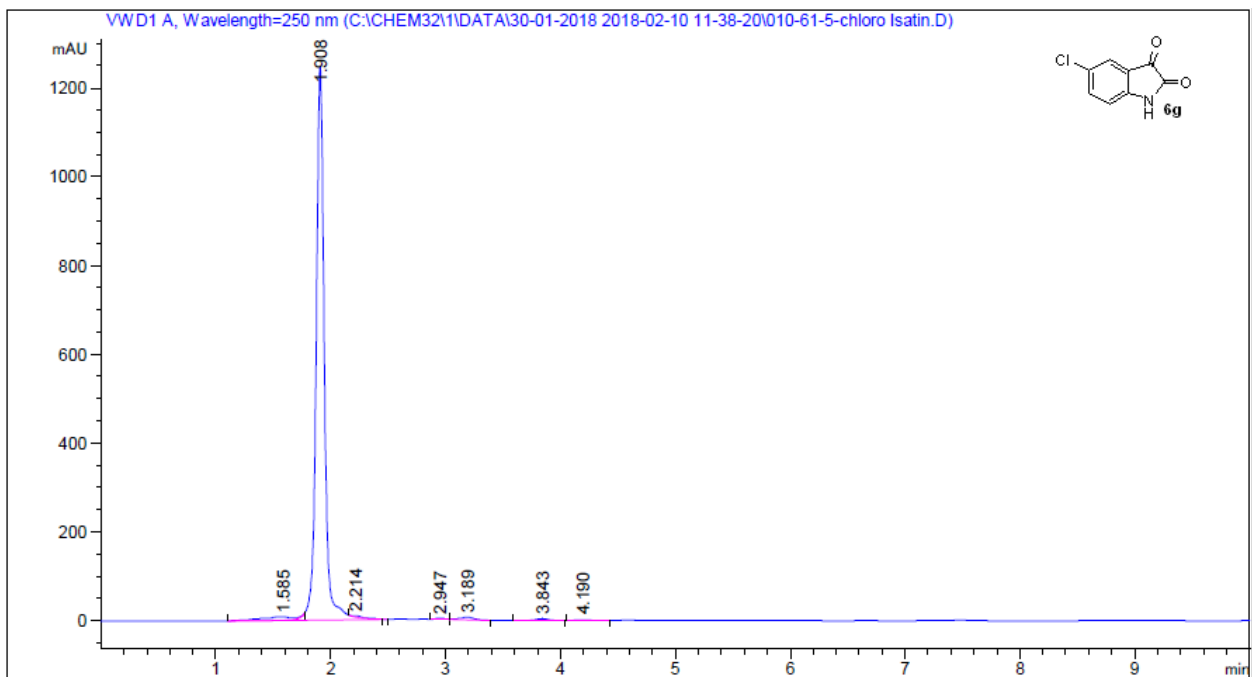

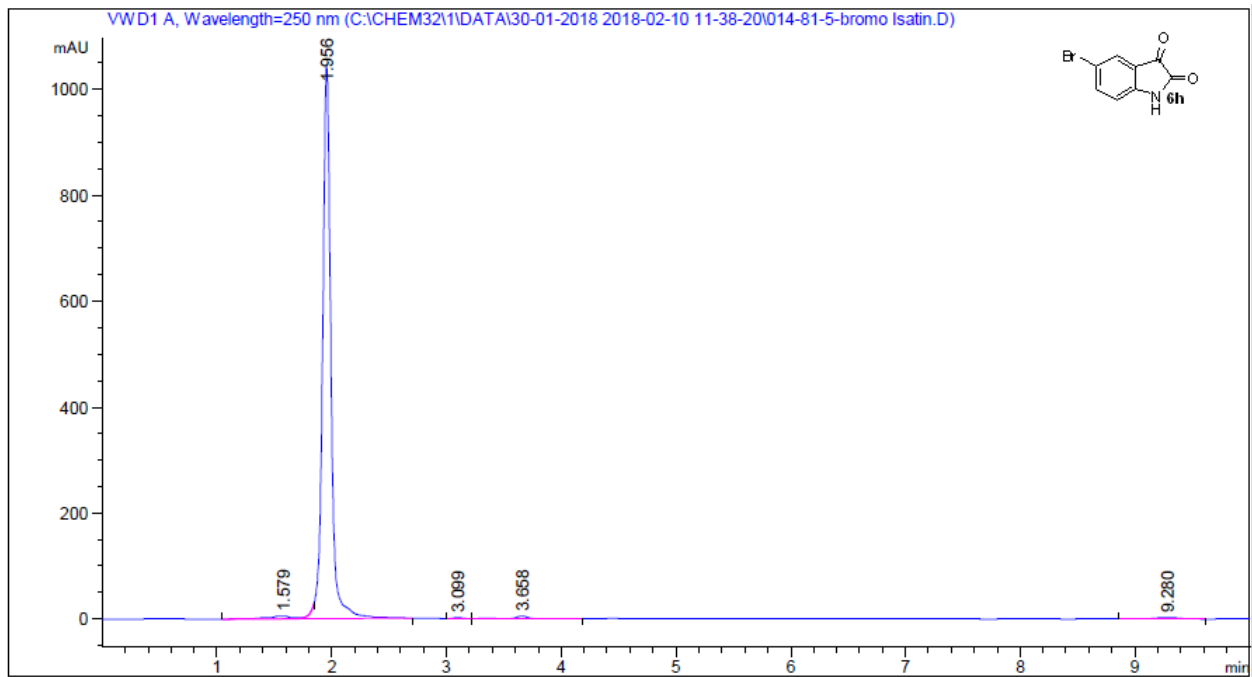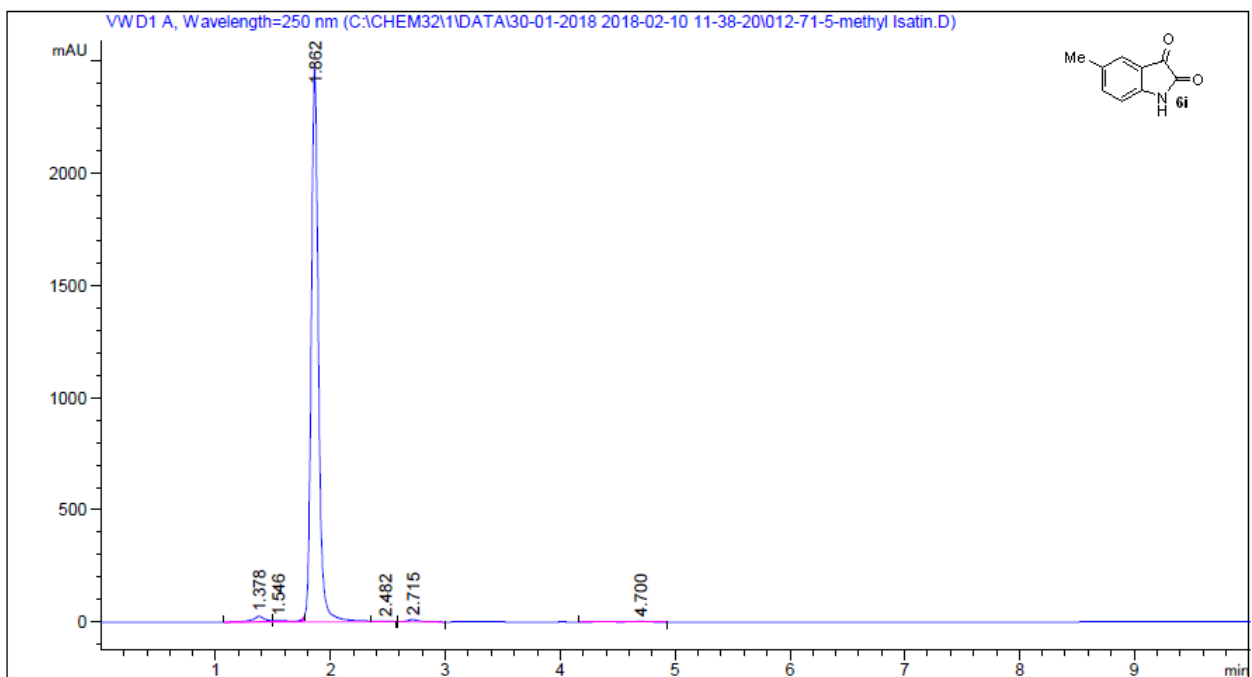

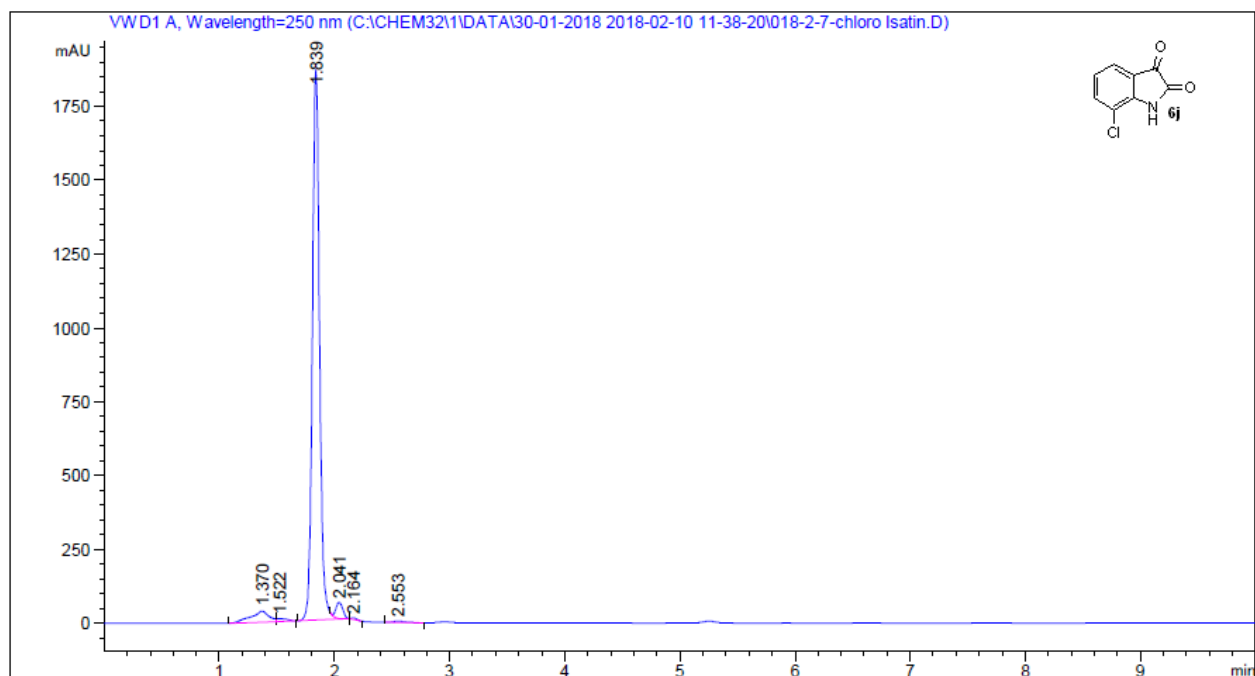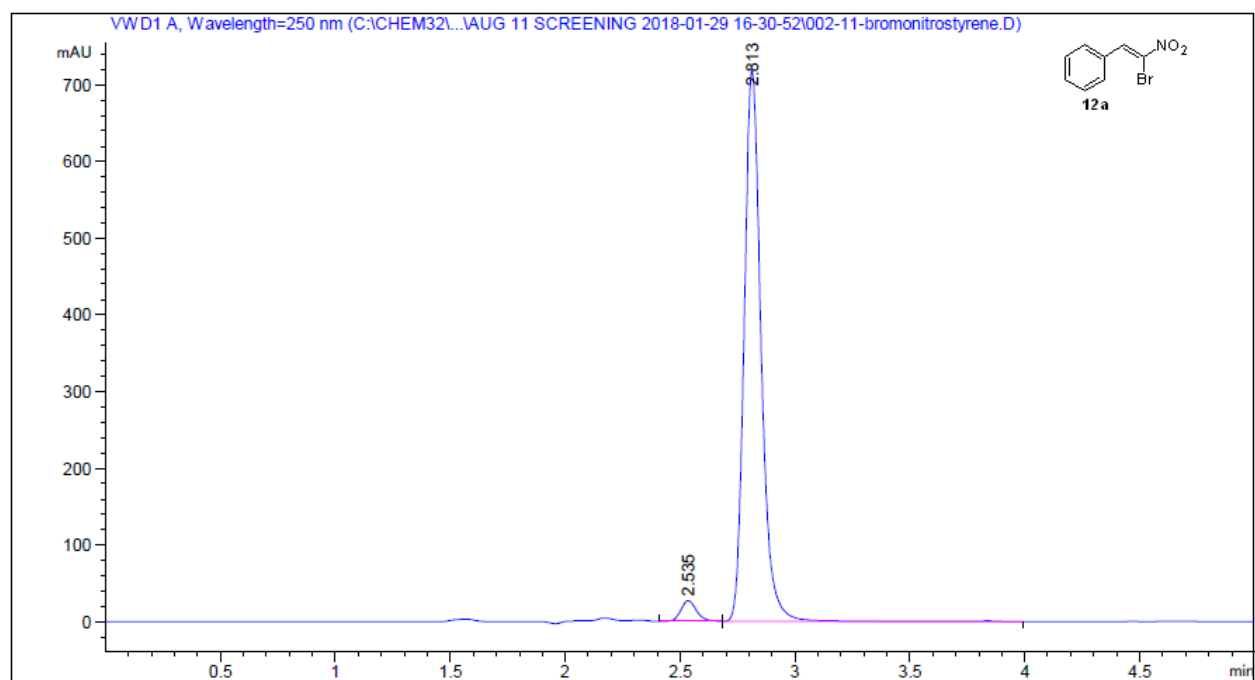

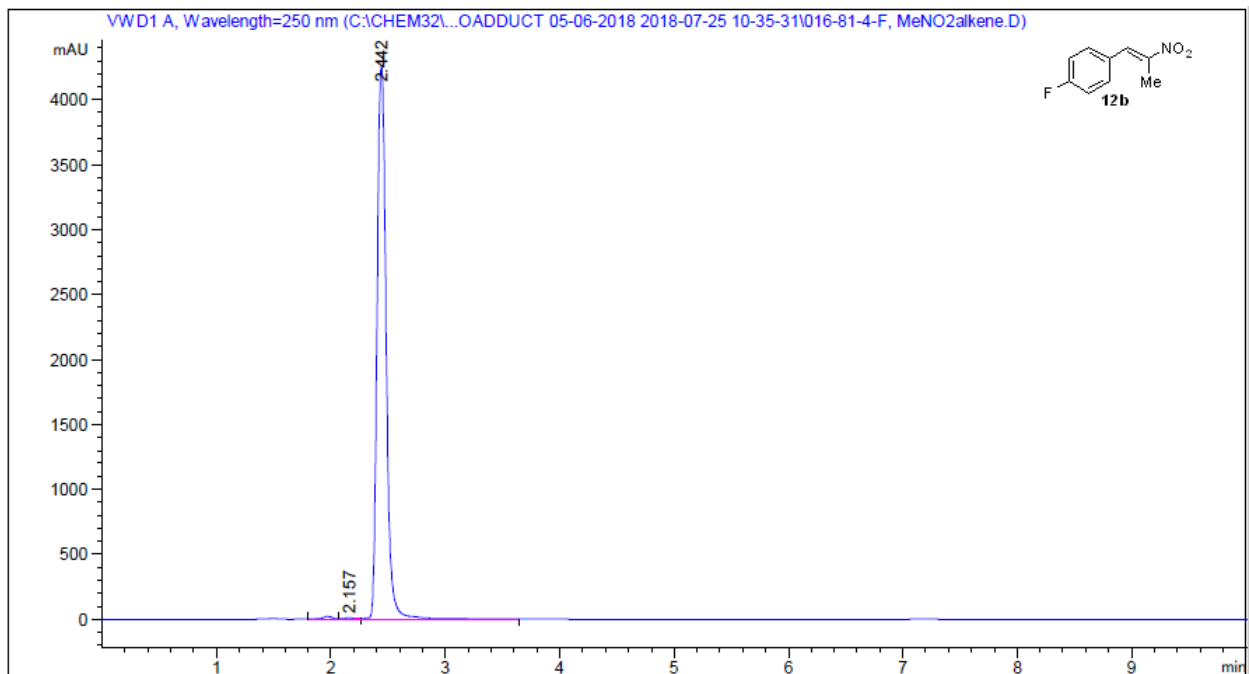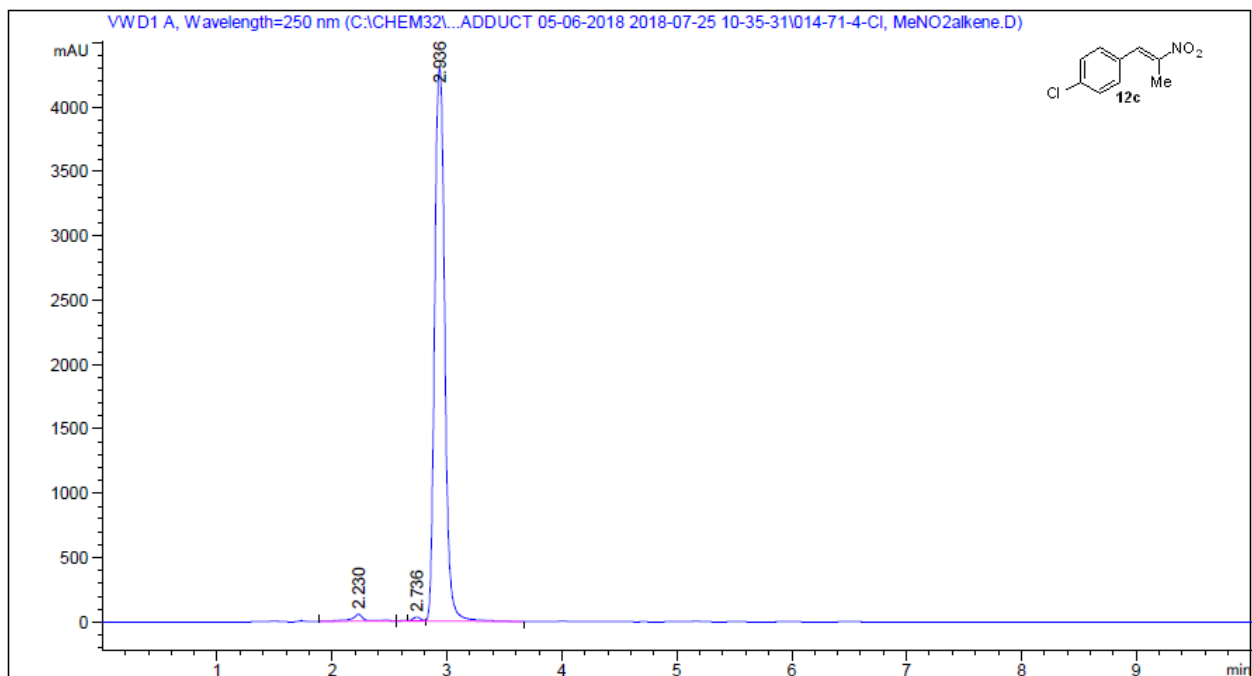

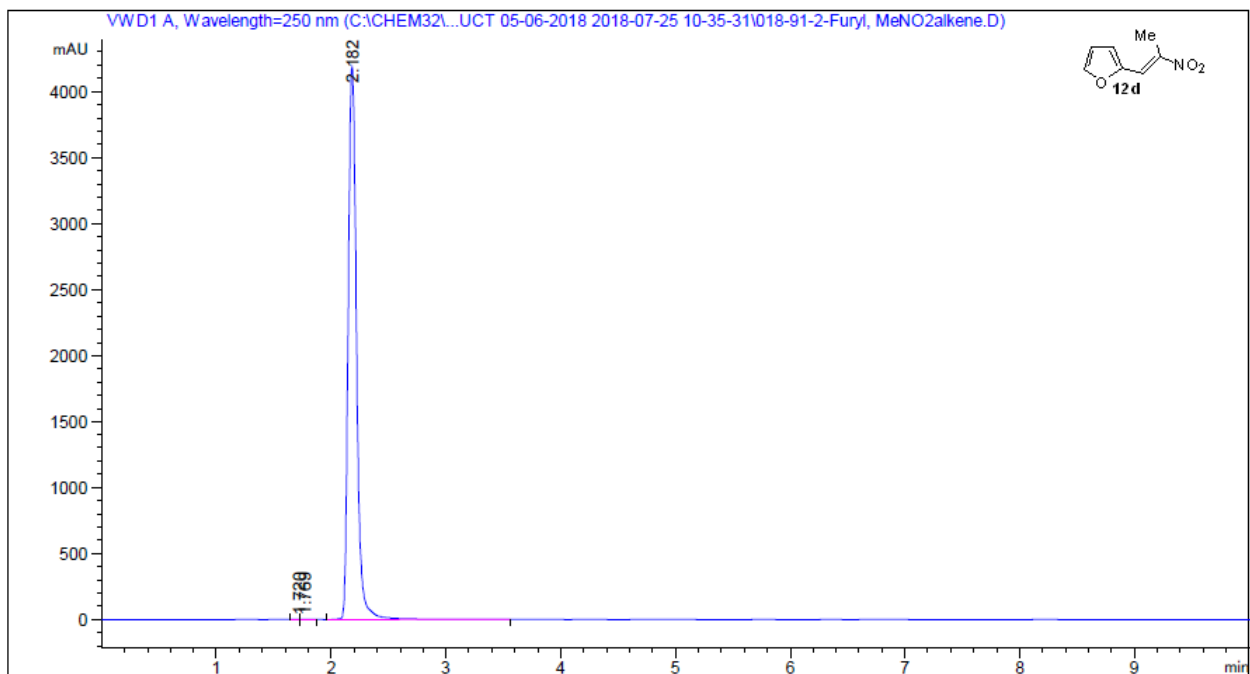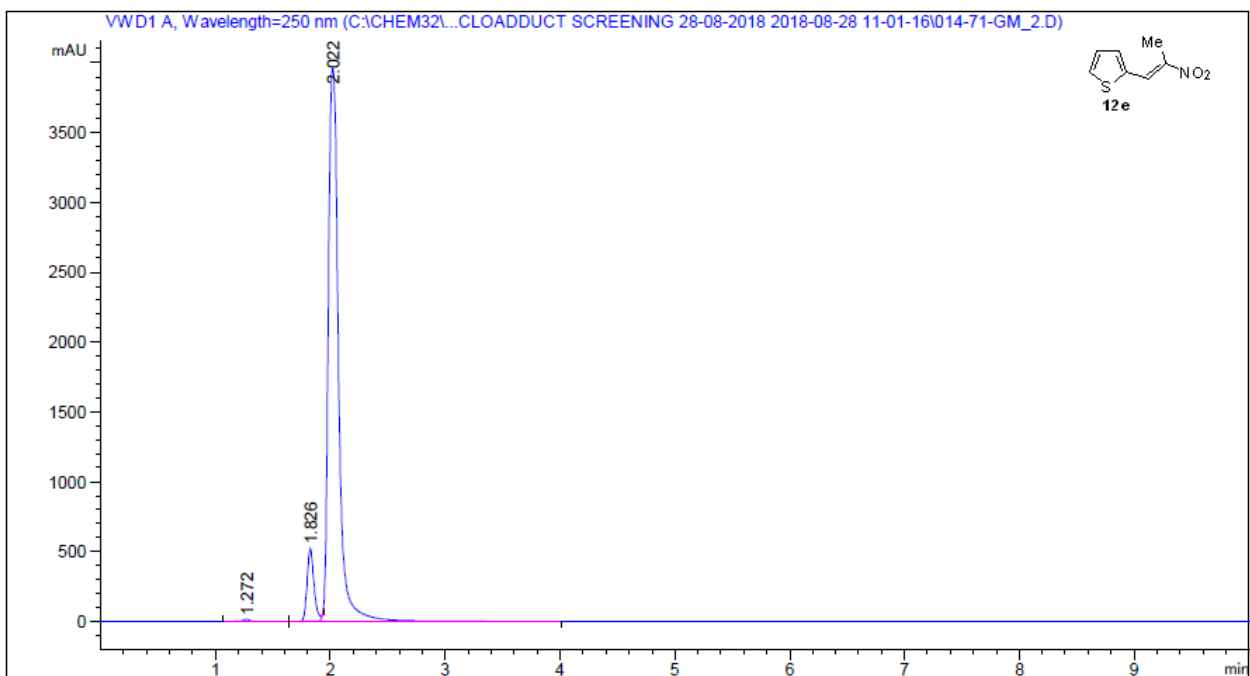



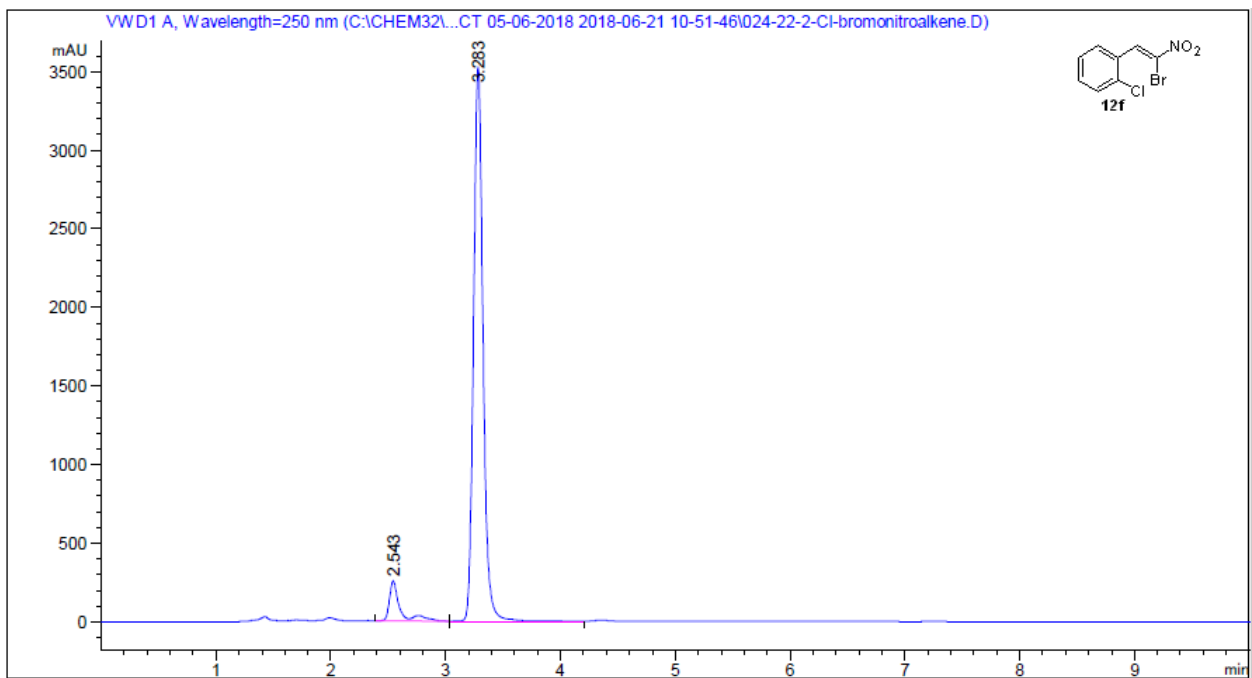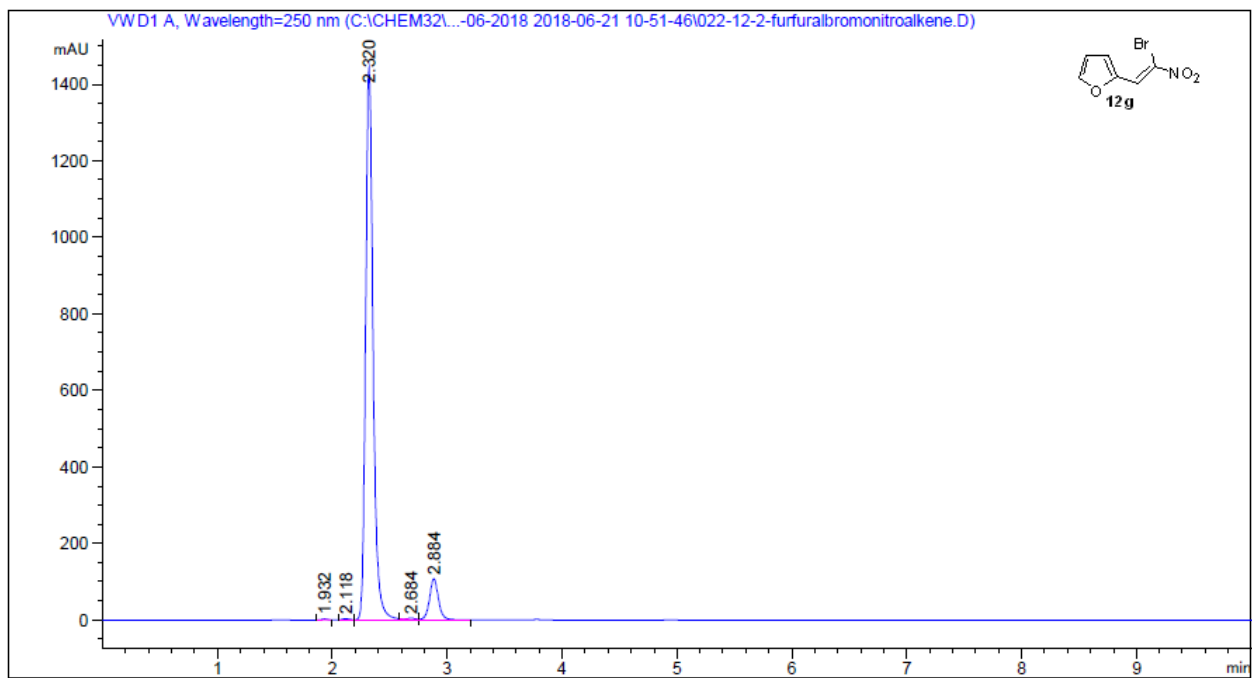

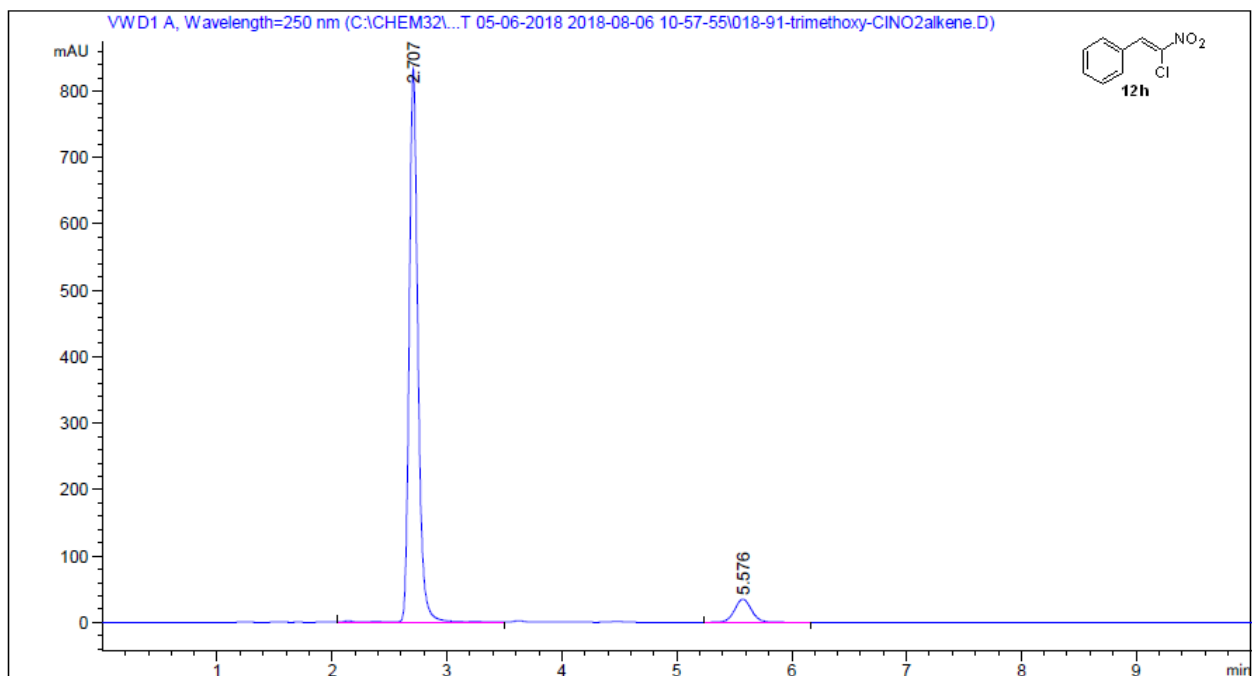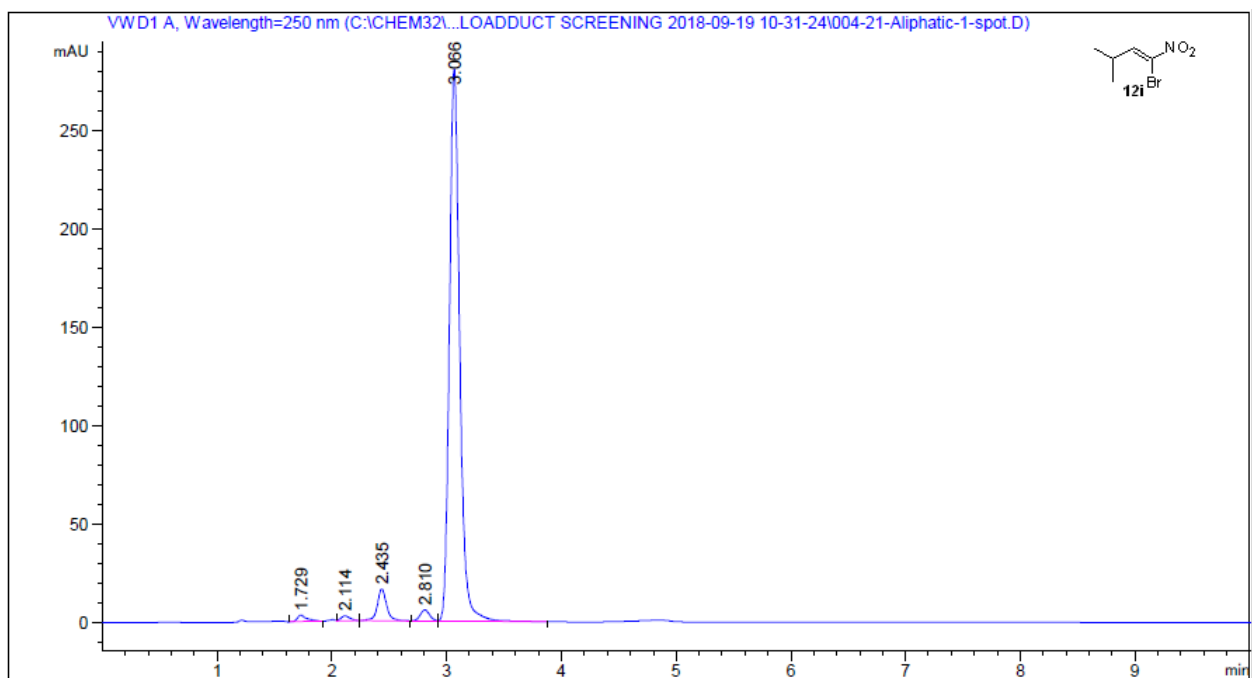

## VIII. Chem3D GS Single point MM2 Calculations on the Intermediate Structures

| Chem3D GS Single point MM2 Calculations on the Intermediate Structures<br>(stepwise mechanism, presumably of highest occupied molecular orbital of the iminium)                                                                                                                                                                                                                                                                                                                                                                                                                                                                                                                                                                                                                                                                                                                                                                                                                                                                                                                               |                                                                                                                            |         |             |             |                   |
|-----------------------------------------------------------------------------------------------------------------------------------------------------------------------------------------------------------------------------------------------------------------------------------------------------------------------------------------------------------------------------------------------------------------------------------------------------------------------------------------------------------------------------------------------------------------------------------------------------------------------------------------------------------------------------------------------------------------------------------------------------------------------------------------------------------------------------------------------------------------------------------------------------------------------------------------------------------------------------------------------------------------------------------------------------------------------------------------------|----------------------------------------------------------------------------------------------------------------------------|---------|-------------|-------------|-------------------|
|                                                                                                                                                                                                                                                                                                                                                                                                                                                                                                                                                                                                                                                                                                                                                                                                                                                                                                                                                                                                                                                                                               |                                                                                                                            |         |             |             |                   |
| <p>Although the total energy of these conformations do not actually reflect the reaction pathway nor the energy of the transition states, it provides an input on ground state energies of these intermediates. As far as the intermediates <b>I-IV</b> are concerned, it is apparent that the nitronate resulted from 're' facial or 'si' facial additions of (S)-shaped ylide <b>8a</b> has relatively lower energies compared to (U)-shaped ylide <b>8b</b>. More importantly, the corresponding energies of intermediates <b>V-VIII</b> of either (S)-shaped ylide <b>8a</b> or (U)-shaped ylide <b>8b</b> resulted from addition of azo-methine ylide of <math>\alpha</math>-methyl glycine has resulted in higher energy structures. This leads to speculation that azo-methine ylide of <math>\alpha</math>-methyl glycine adds <i>via</i> carbanion <b>8a'</b> to 're' facial 1-bromo-nitrostyrene to result in opposite regioisomer. Grossly these energy values agree with the stereochemical outcome with regard to regioselectivity of the reaction (<math>R^2=H, Me</math>).</p> |                                                                                                                            |         |             |             |                   |
| Intermediate Structure                                                                                                                                                                                                                                                                                                                                                                                                                                                                                                                                                                                                                                                                                                                                                                                                                                                                                                                                                                                                                                                                        | Chem3D GS Single point MM2 minimized structures                                                                            | Torsion | Non-1,4 VDW | 1,4 VDW     | Total Energy      |
| (KCal/mol)                                                                                                                                                                                                                                                                                                                                                                                                                                                                                                                                                                                                                                                                                                                                                                                                                                                                                                                                                                                                                                                                                    |                                                                                                                            |         |             |             |                   |
| <b>I</b>                                                                                                                                                                                                                                                                                                                                                                                                                                                                                                                                                                                                                                                                                                                                                                                                                                                                                                                                                                                                                                                                                      | <p>'Re' facial addition to nitroalkene (E)-<b>12a</b> <i>via</i> (S)-Shaped ylide <b>8a</b>; (<math>R^2=R^4=H</math>)</p>  | -6.0915 | 100.8209    | 17.419<br>0 | -<br>337.058<br>6 |
| <b>II</b>                                                                                                                                                                                                                                                                                                                                                                                                                                                                                                                                                                                                                                                                                                                                                                                                                                                                                                                                                                                                                                                                                     | <p>'Re' facial addition to nitroalkene (E)-<b>12a</b> <i>via</i> (U)-shaped ylide <b>8b</b>; (<math>R^2=R^4=Me</math>)</p> | -6.2391 | 102.9775    | 17.065<br>1 | -<br>335.387<br>6 |

|                                                                                                      |                                                                                                                                                                                                                                                  |         |          |             |                   |
|------------------------------------------------------------------------------------------------------|--------------------------------------------------------------------------------------------------------------------------------------------------------------------------------------------------------------------------------------------------|---------|----------|-------------|-------------------|
|                                                                                                      | <b>12a</b> via ( <i>U</i> )-Shaped ylide <b>8b</b> ;<br>( $R^2=R^4=H$ )                                                                                                                                                                          |         |          |             |                   |
| <p><b>III</b></p> 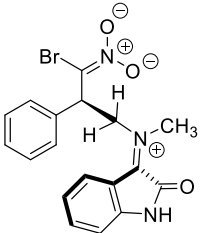  |  <p>'<i>Si</i>' facial addition to nitroalkene (<i>E</i>)-<b>12a</b><br/>via (<i>S</i>)-Shaped ylide <b>8a</b>; (<math>R^2=R^4=H</math>)</p>                    | -6.0869 | 100.8038 | 17.419<br>3 | -<br>337.058<br>5 |
| <p><b>IV</b></p>    |  <p>'<i>Si</i>' facial addition to nitroalkene (<i>E</i>)-<b>12a</b><br/>via (<i>U</i>)-Shaped ylide <b>8b</b>; (<math>R^2=R^4=H</math>)</p>                    | -6.1971 | 102.9784 | 17.056<br>4 | -<br>335.388<br>9 |
| <p><b>V</b></p>   |  <p>'<i>Re</i>' facial addition to nitroalkene (<i>E</i>)-<b>12a</b> via (<i>S</i>)-Shaped ylide <b>8a</b>; (<math>R^2=Me</math>,<br/><math>R^4=H</math>)</p> | 4.2126  | 73.2864  | 28.250<br>2 | -<br>209.629<br>9 |
| <p><b>VI</b></p>  |  <p>'<i>Re</i>' facial addition to nitroalkene (<i>E</i>)-</p>                                                                                                | 1.1283  | 72.6976  | 26.984<br>6 | -<br>202.799<br>7 |

|                                                                                                      |                                                                                                                                                                                                                                                        |         |          |             |                   |
|------------------------------------------------------------------------------------------------------|--------------------------------------------------------------------------------------------------------------------------------------------------------------------------------------------------------------------------------------------------------|---------|----------|-------------|-------------------|
|                                                                                                      | <b>12a</b> via ( <i>U</i> )-Shaped ylide <b>8b</b> ; ( $R^2=Me$ , $R^4=H$ )                                                                                                                                                                            |         |          |             |                   |
| 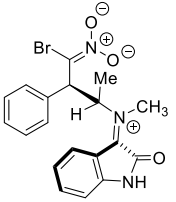 <p><b>VII</b></p>  |  <p>'<i>Si</i>' facial addition to nitroalkene (<i>E</i>)-<b>12a</b><br/>via (<i>S</i>)-Shaped ylide <b>8a</b>; (<math>R^2=Me</math>, <math>R^4=H</math>)</p>         | 2.5241  | 73.1824  | 25.911<br>4 | -<br>205.239<br>7 |
|  <p><b>VIII</b></p> |  <p>'<i>Si</i>' facial addition to nitroalkene (<i>E</i>)-<b>12a</b><br/>via (<i>U</i>)-Shaped ylide <b>8b</b>; (<math>R^2=Me</math>, <math>R^4=H</math>)</p>         | 2.0156  | 104.5159 | 18.582<br>2 | -<br>321.888<br>9 |
|  <p><b>IX</b></p> |  <p>'<i>Re</i>' facial addition to nitroalkene (<i>E</i>)-<b>12a</b> via (<i>S</i>)-Shaped benzylic anion <b>8a</b>?; (<math>R^2=Me</math>, <math>R^4=H</math>)</p> | -5.5806 | 100.8601 | 17.032<br>6 | -<br>328.663<br>5 |
|  <p><b>X</b></p>  |                                                                                                                                                                     | -5.1472 | 101.3293 | 17.443<br>1 | -<br>325.784<br>4 |

|  |                                                                                                                                                          |  |  |  |  |
|--|----------------------------------------------------------------------------------------------------------------------------------------------------------|--|--|--|--|
|  | 'Si' facial addition to nitroalkene ( <i>E</i> )- <b>12a</b> via ( <i>S</i> )-Shaped benzylic anion <b>8a'</b> ; (R <sup>2</sup> =Me, R <sup>4</sup> =H) |  |  |  |  |
|--|----------------------------------------------------------------------------------------------------------------------------------------------------------|--|--|--|--|
